# Supplementary material for: Eco-Friendly Synthesis of a New Class of Pyridinium-Based Ionic Liquids with Attractive Antimicrobial Activity
Source: PubMed Central journal article supplement (PMC6331848; doi:10.3390/molecules200814936), 2015-08-14

MS 764  
MS 264

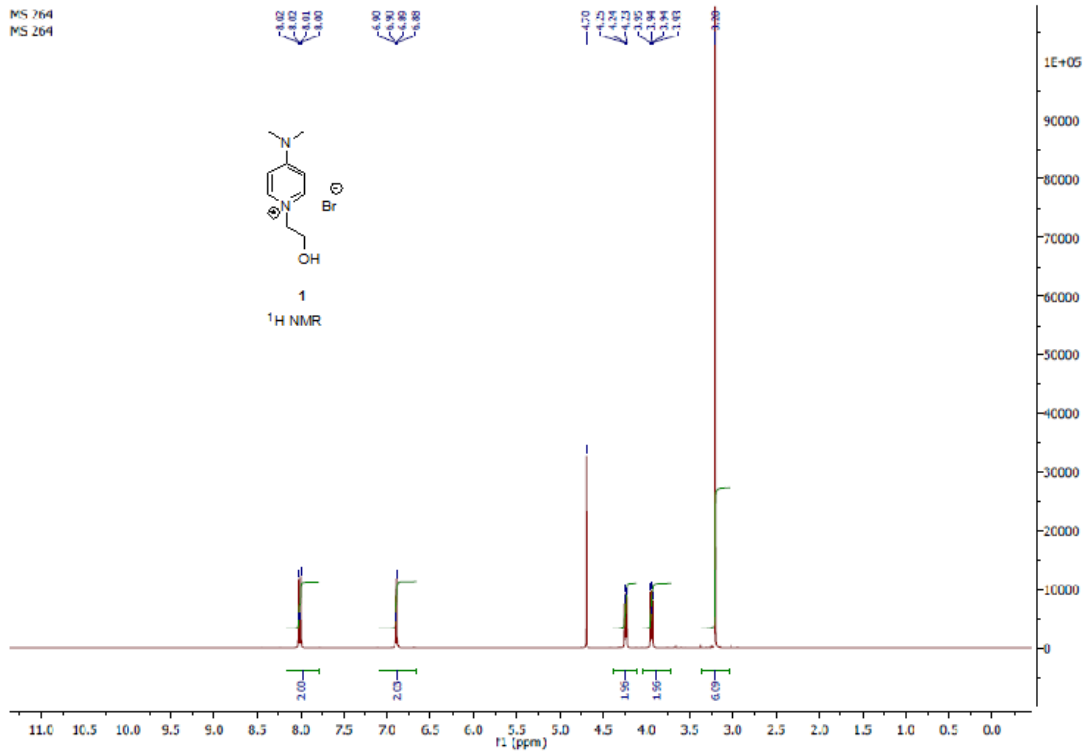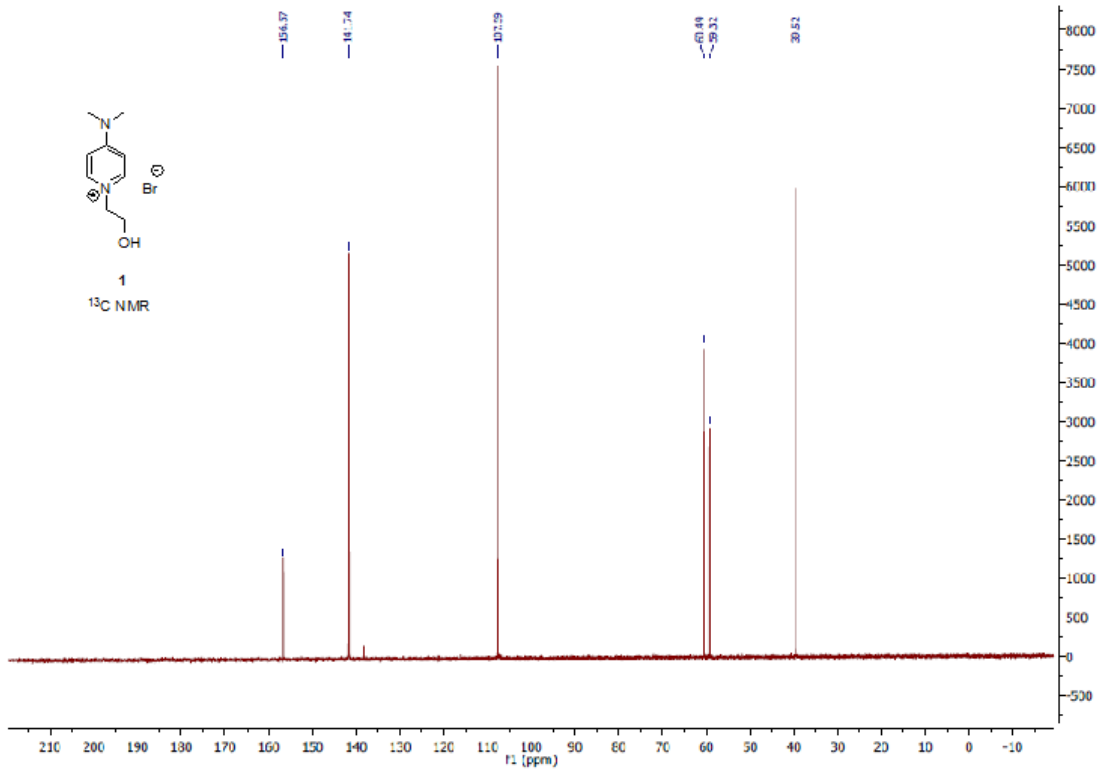

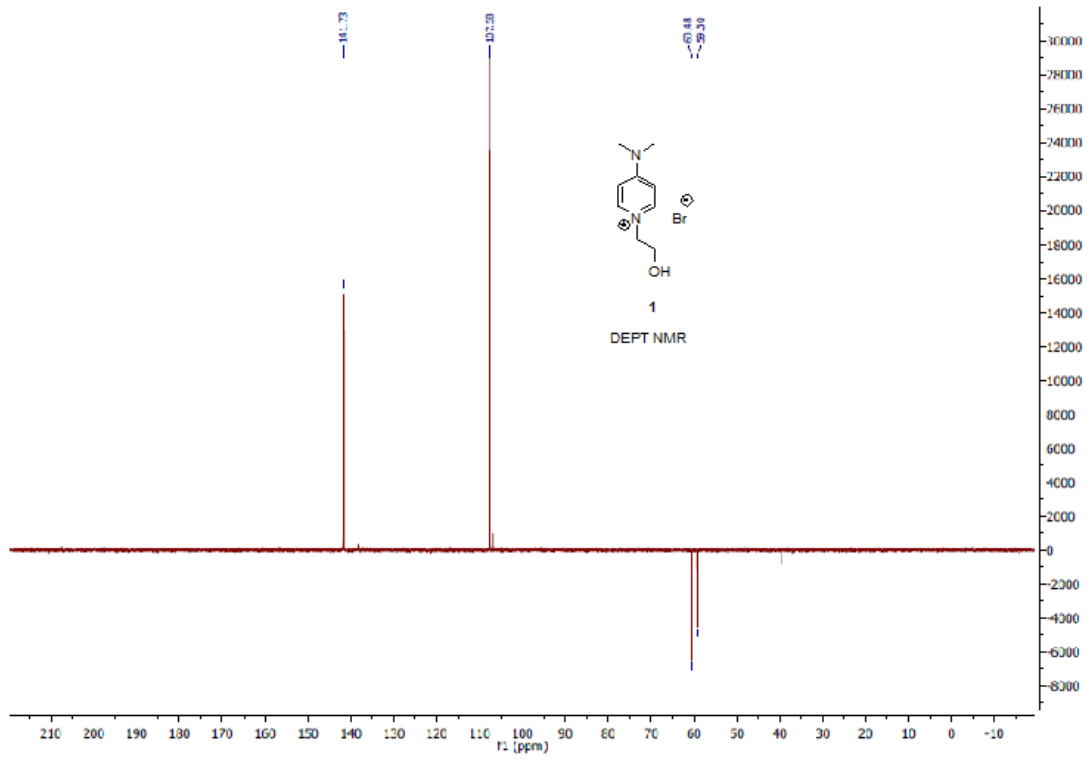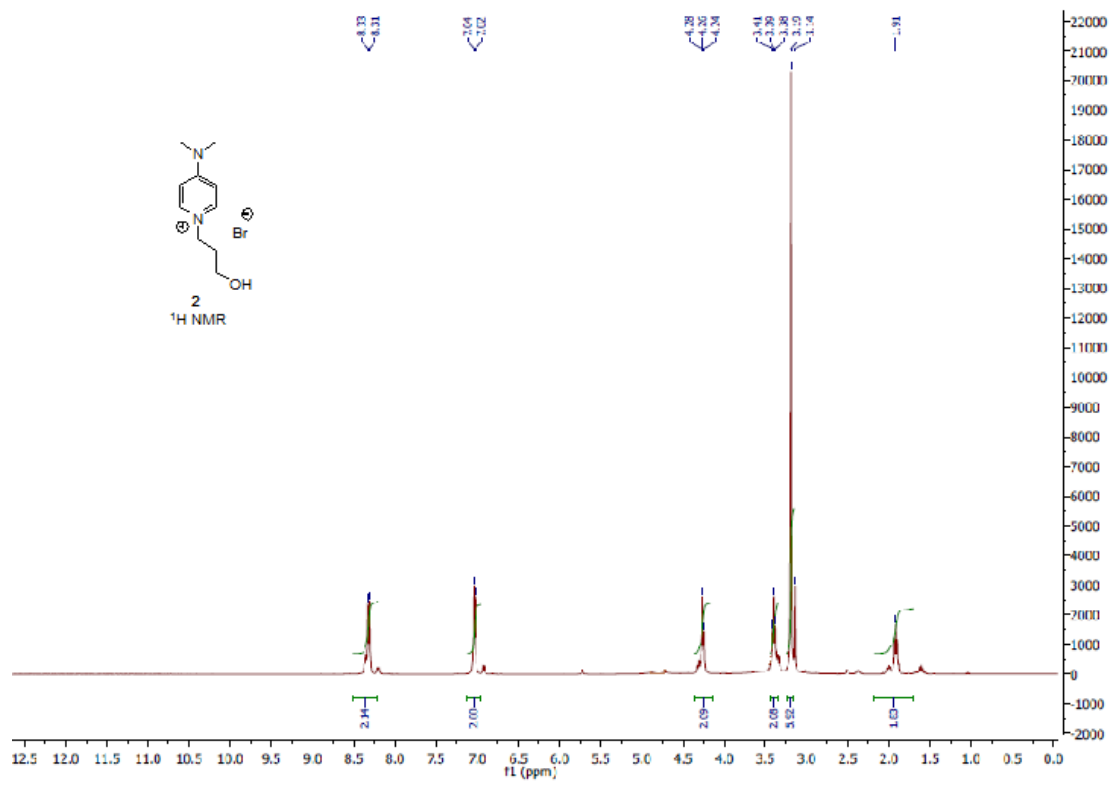

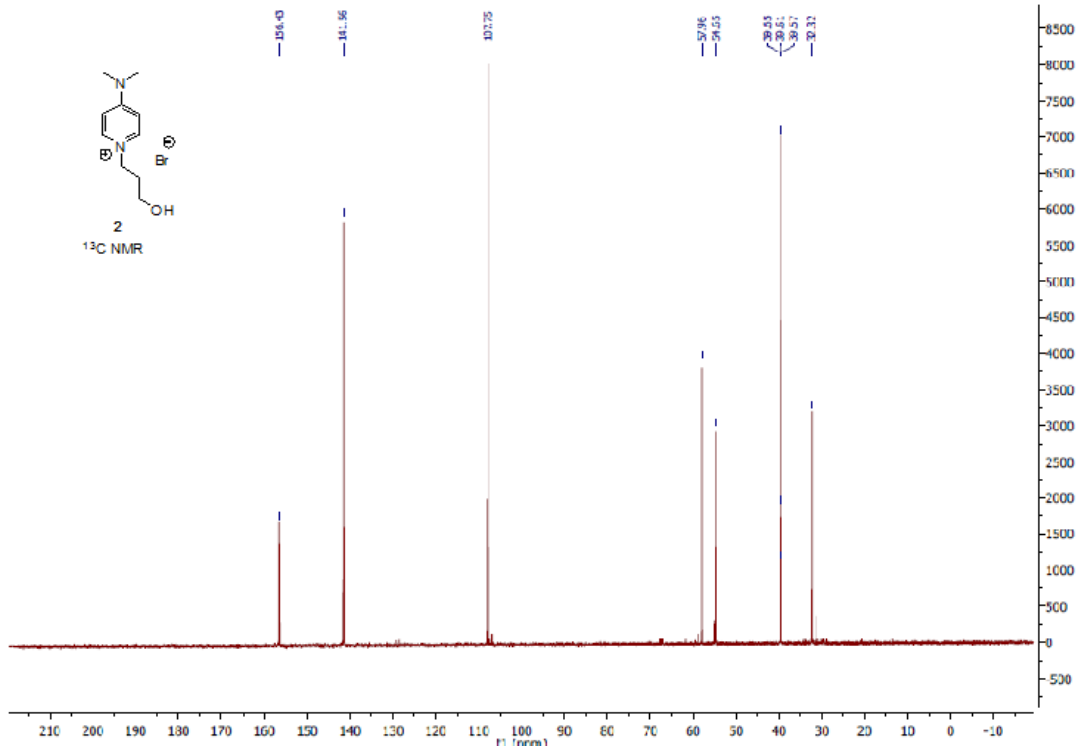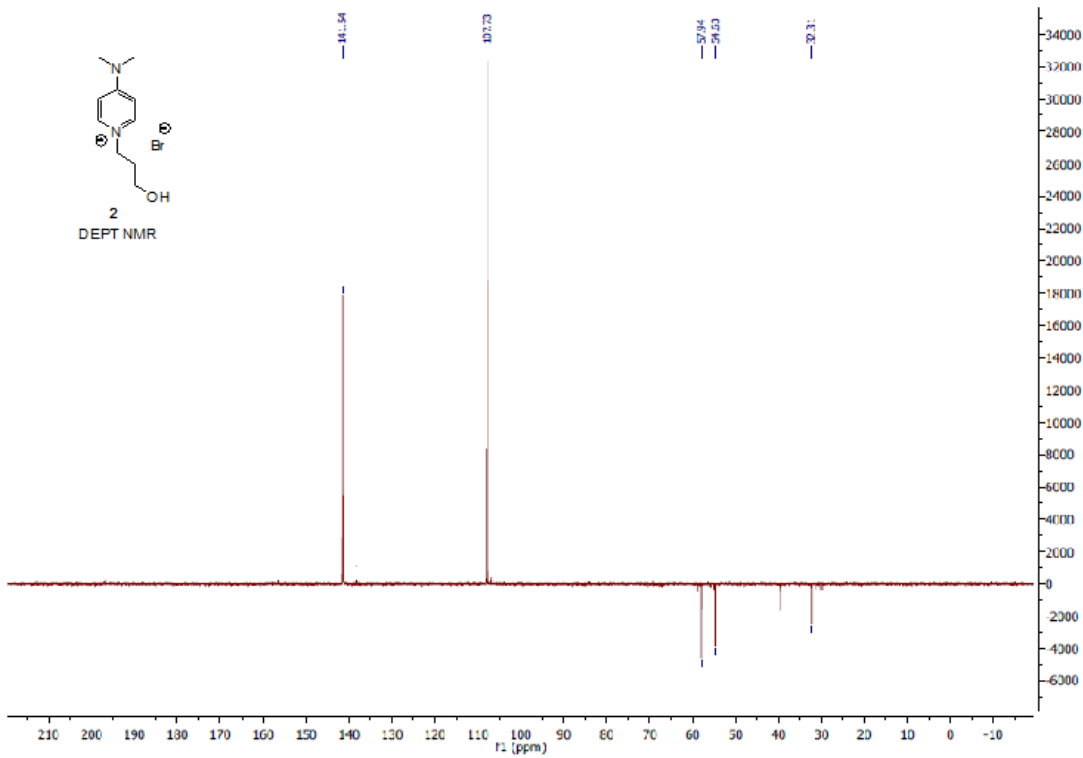

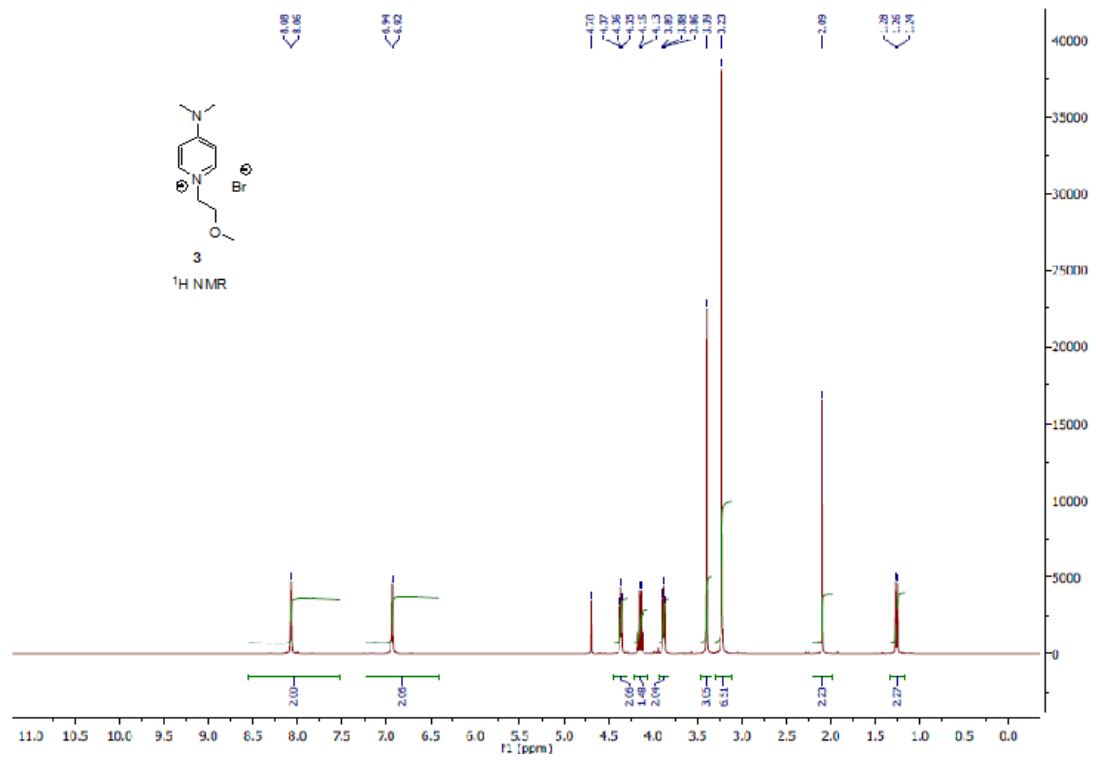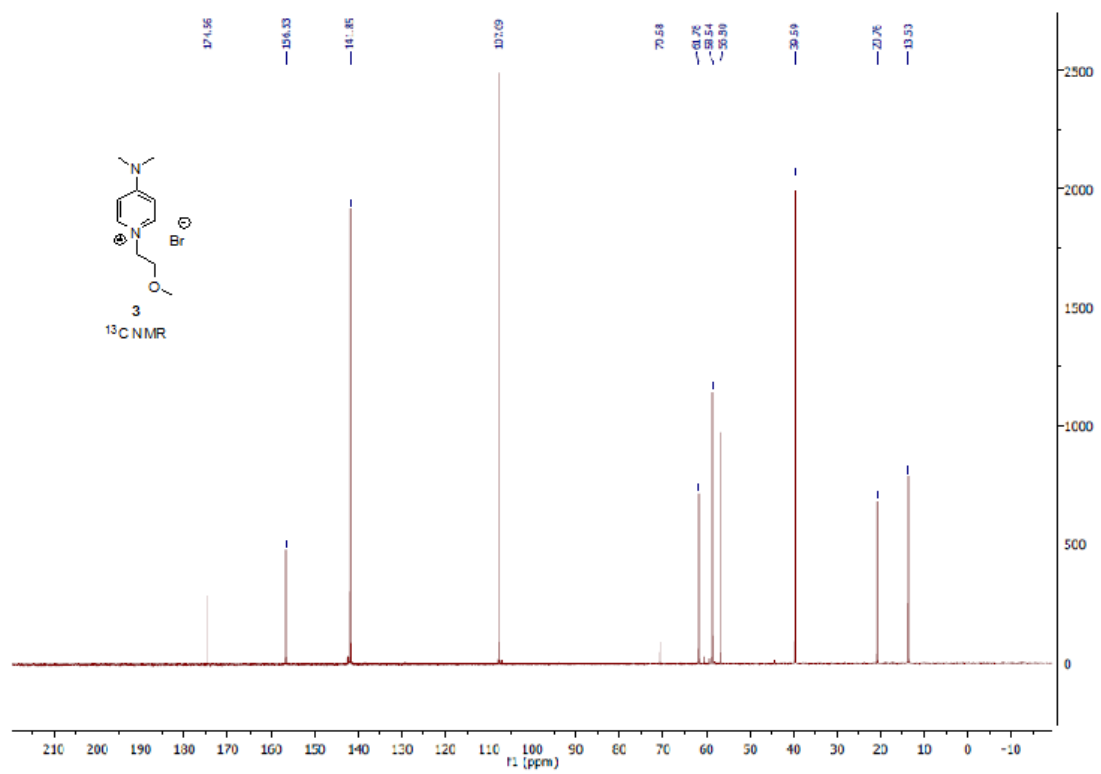

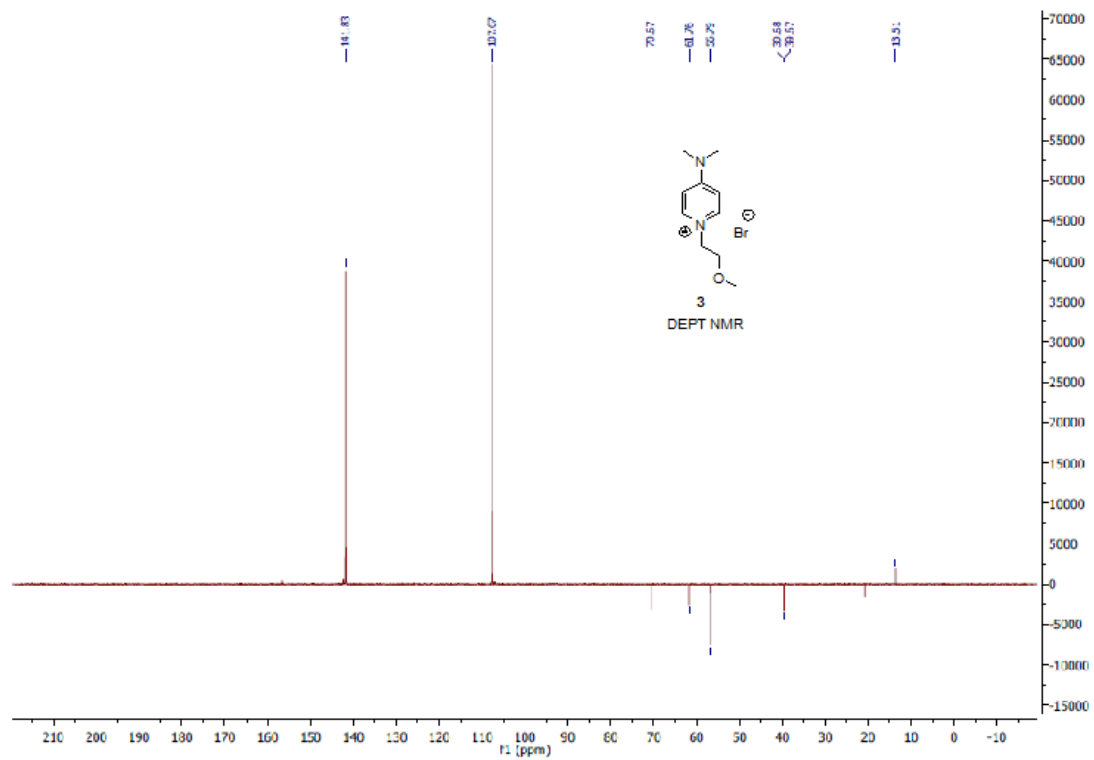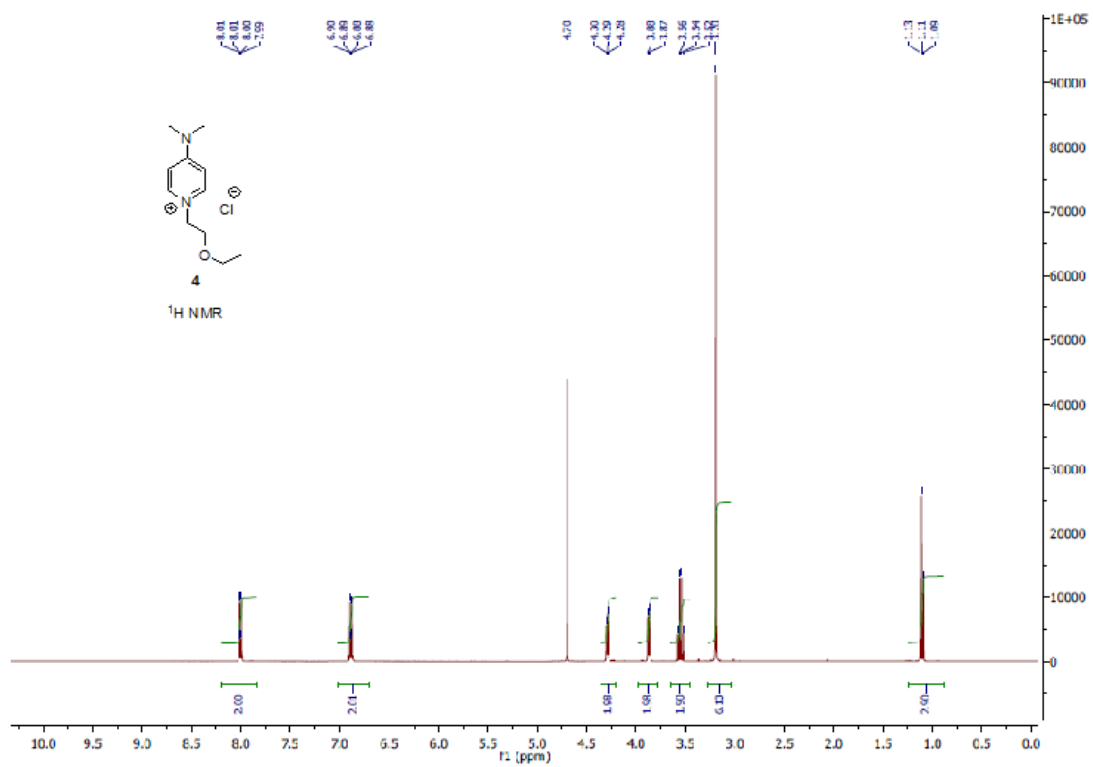

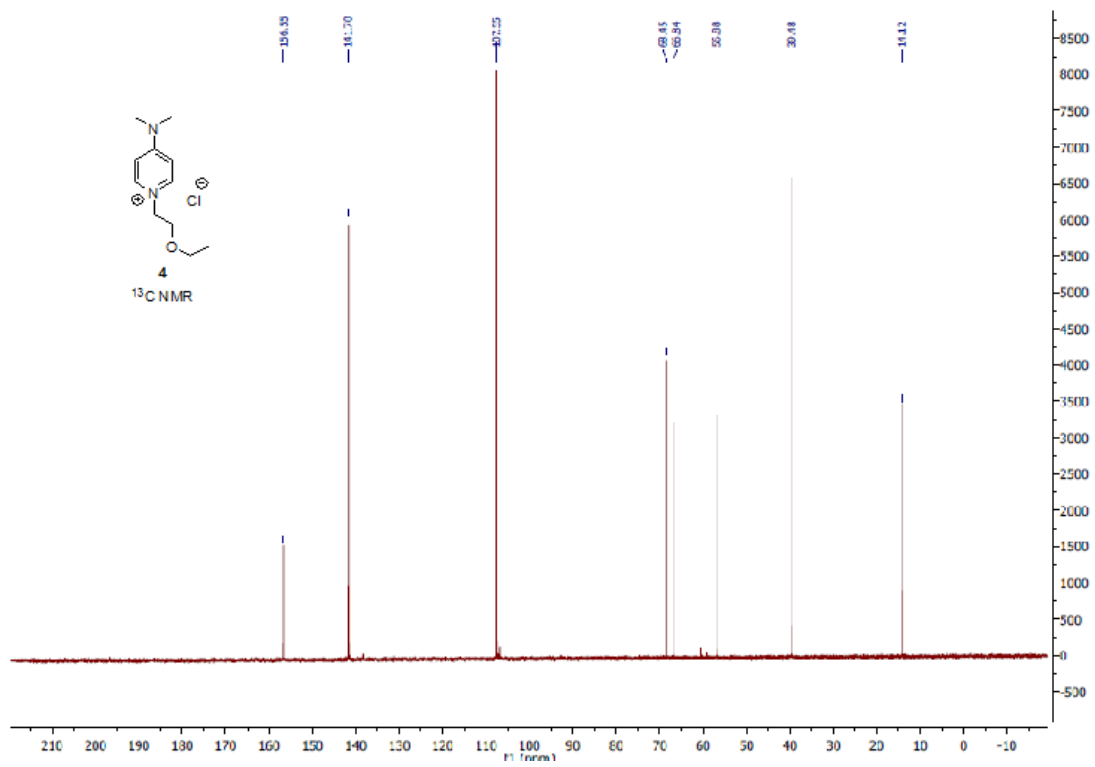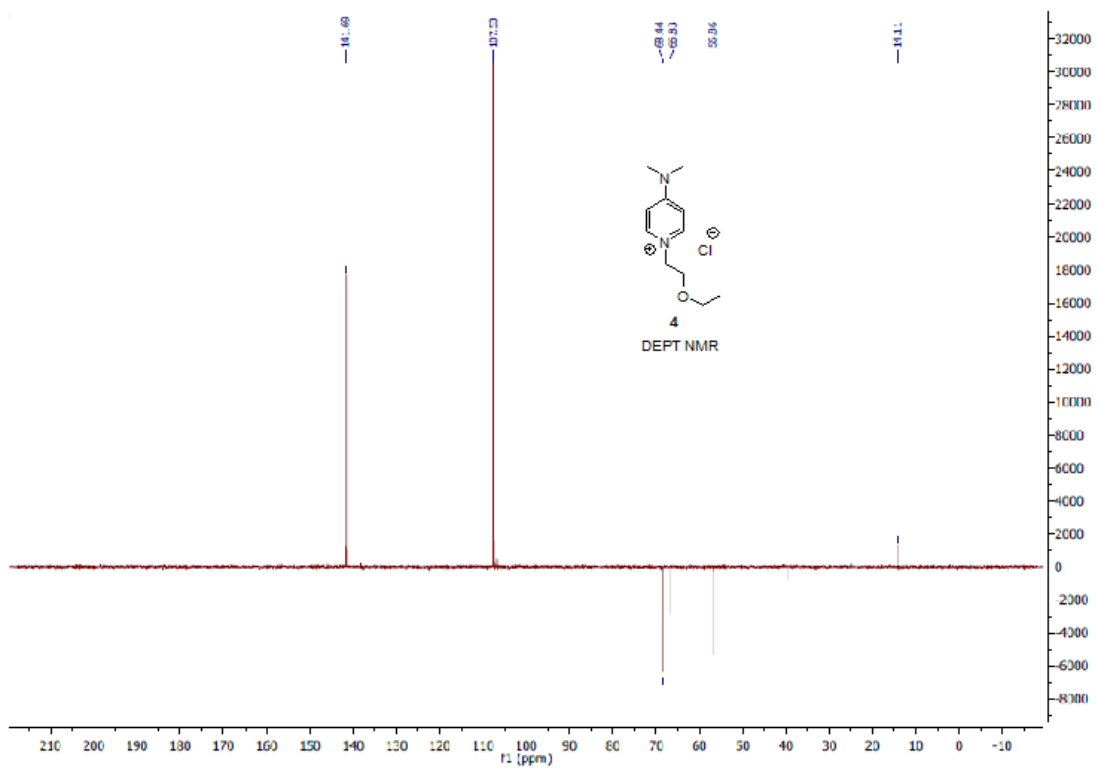

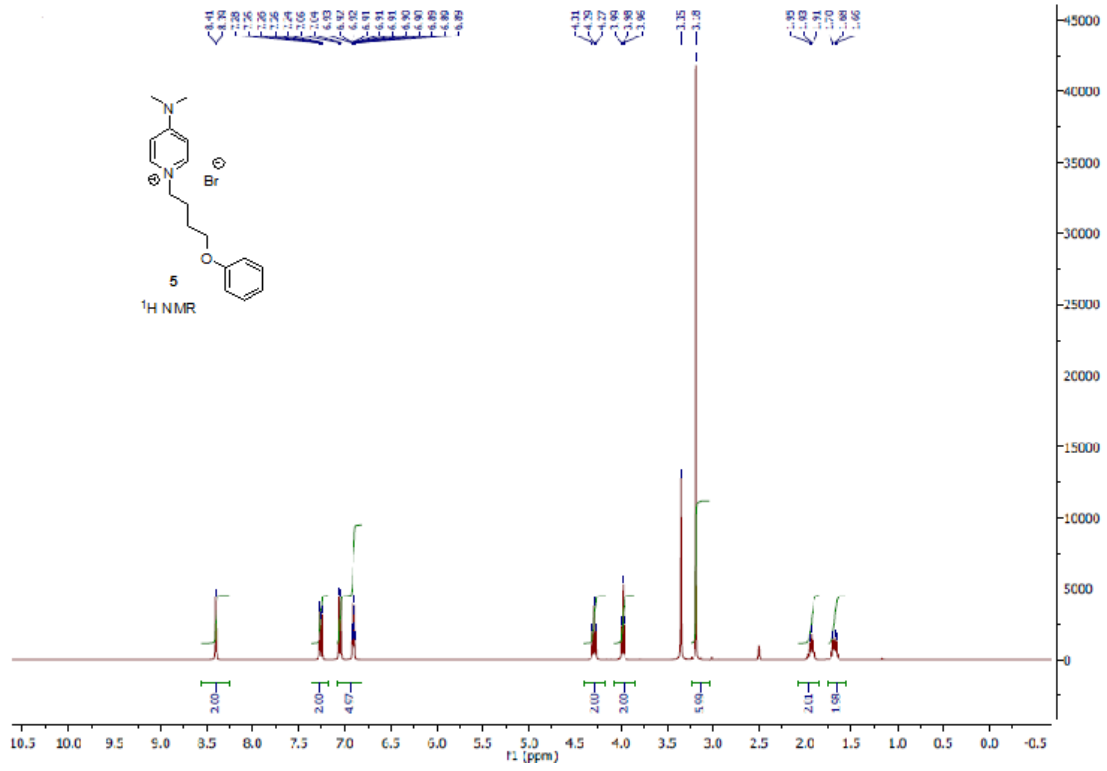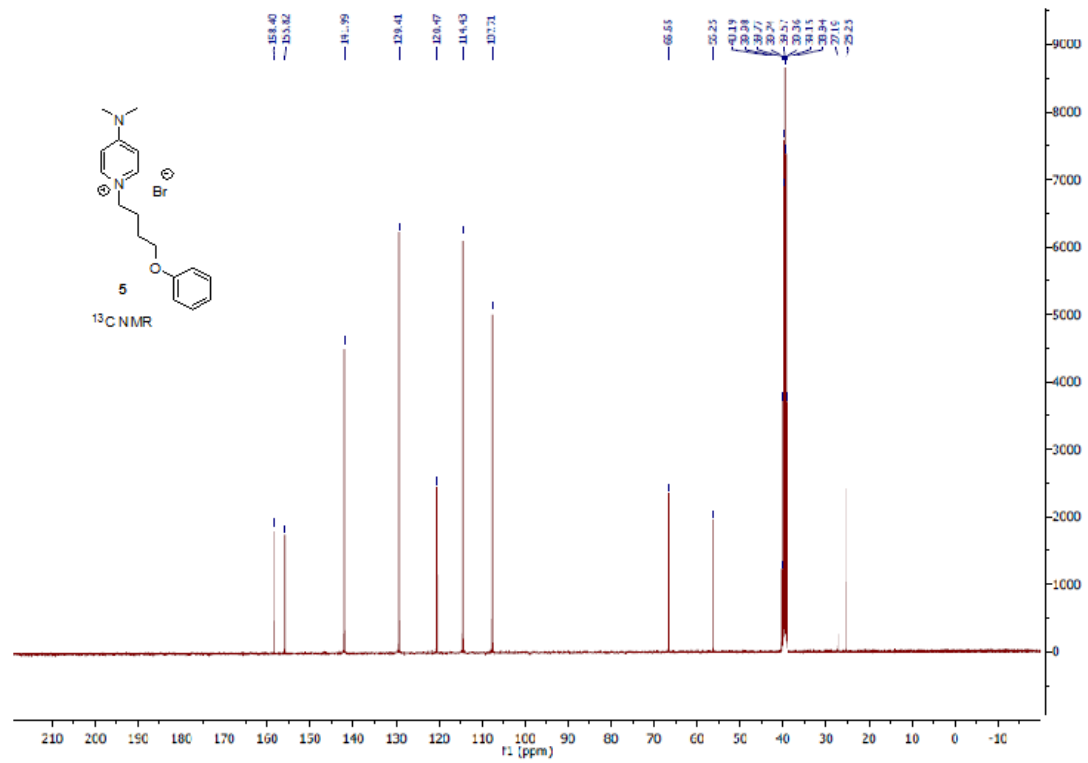

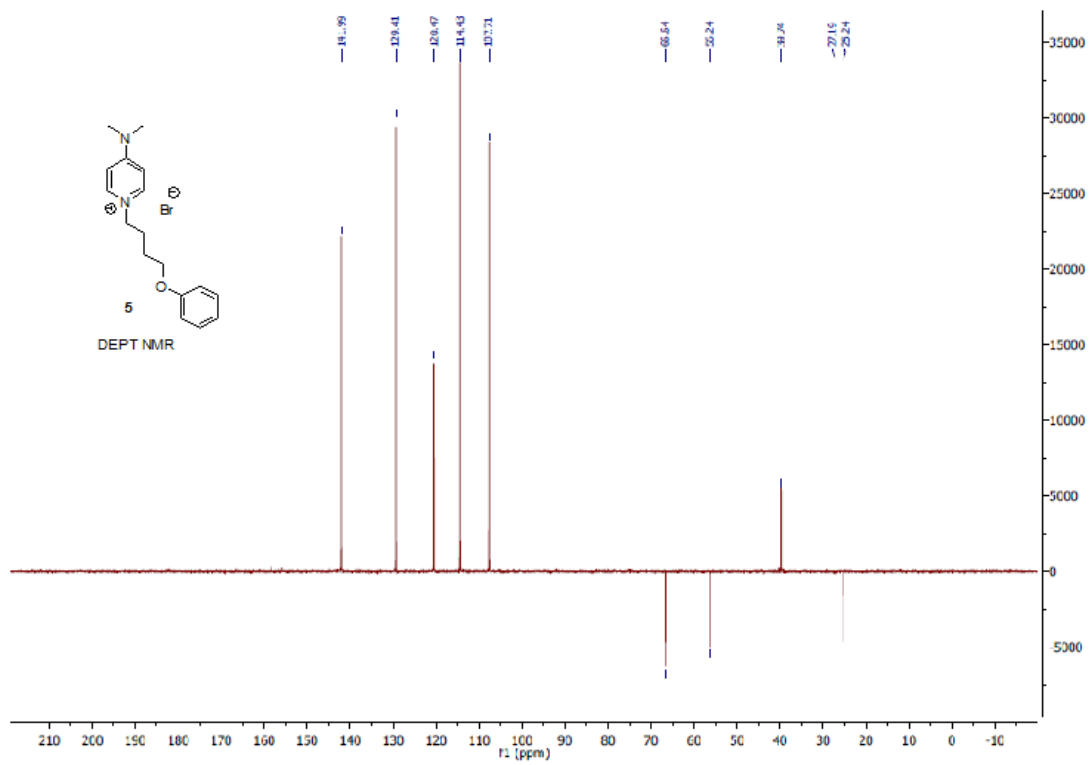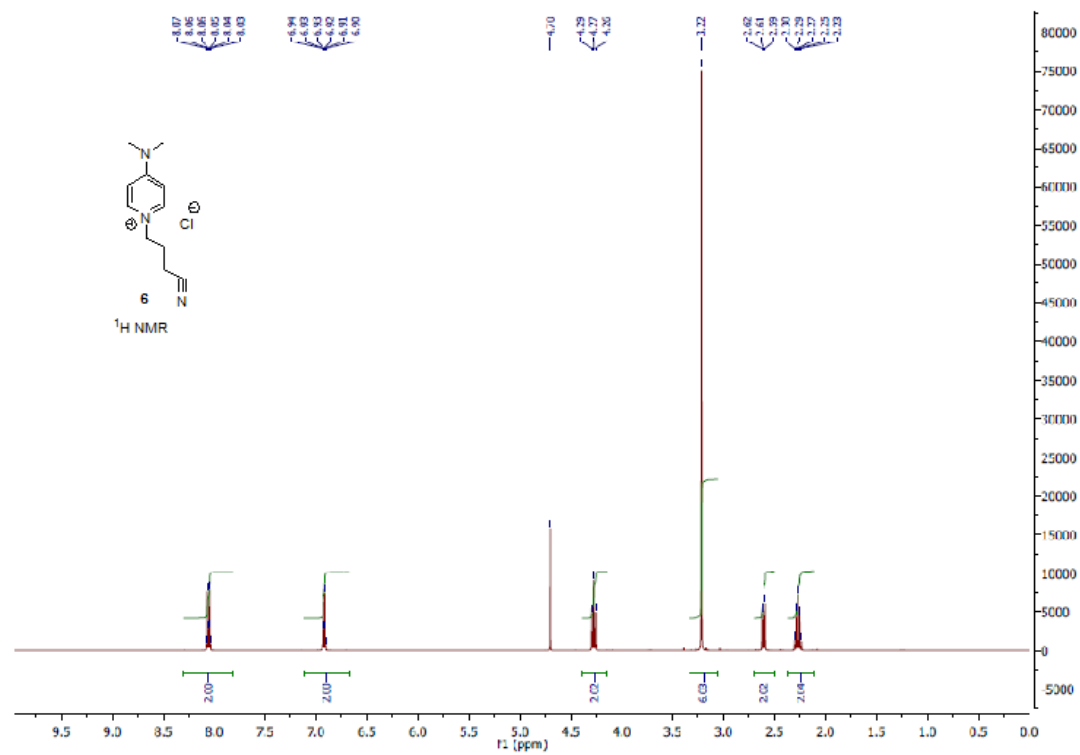



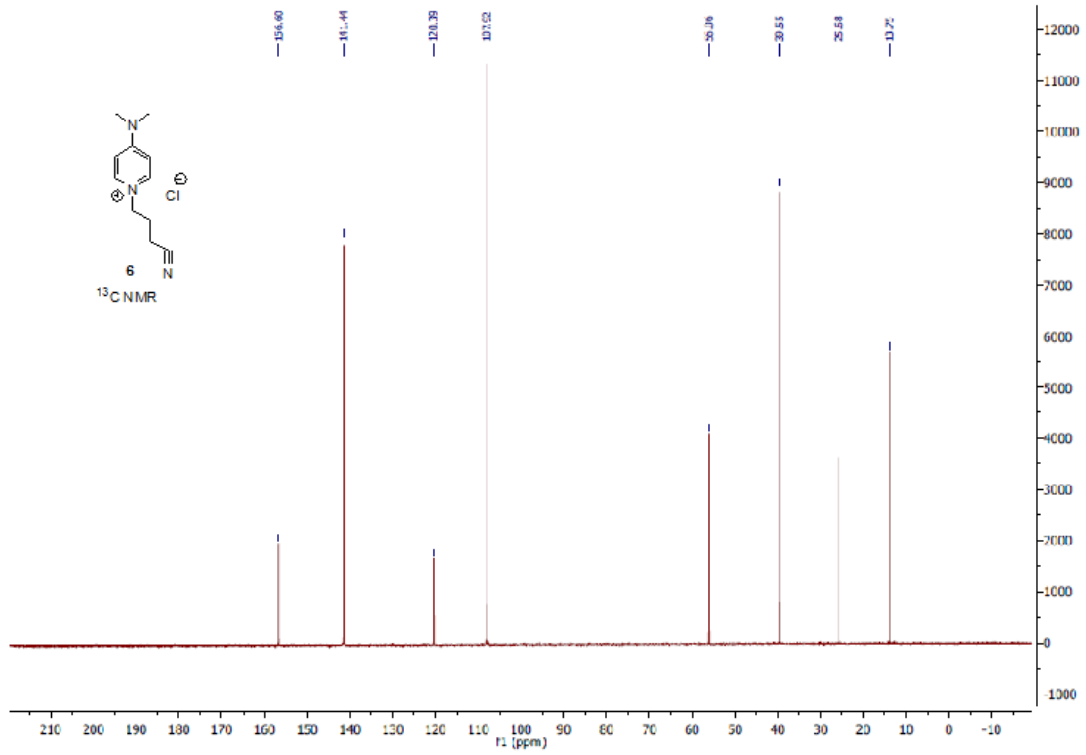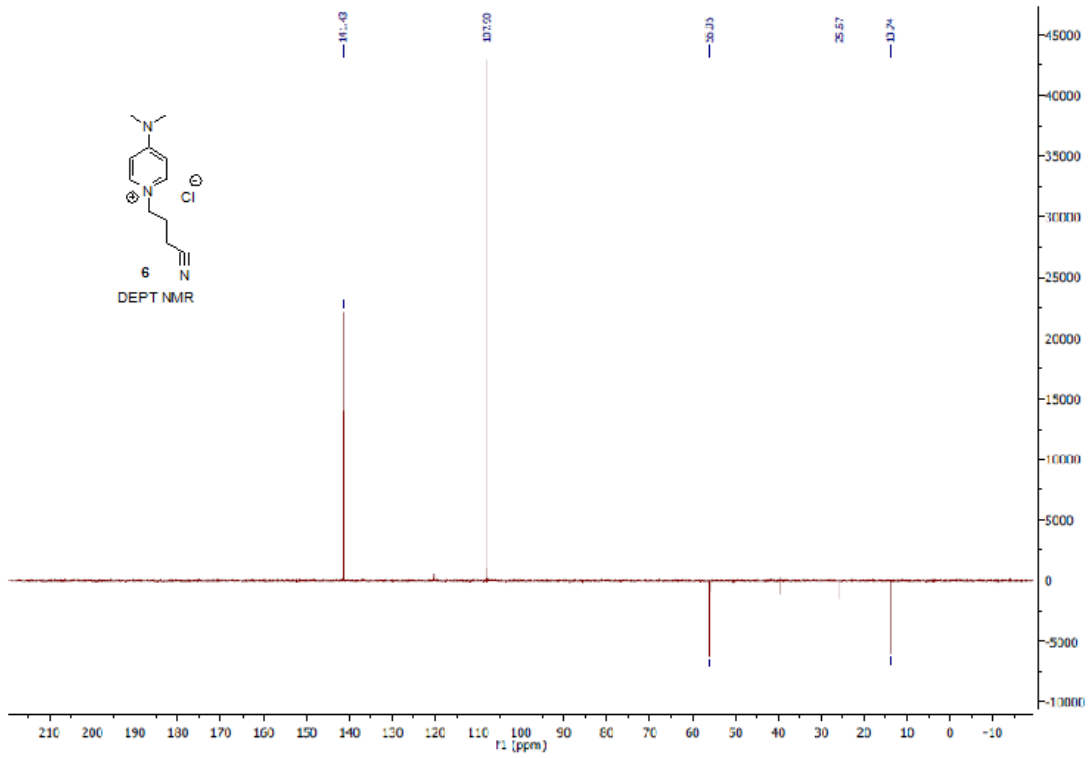

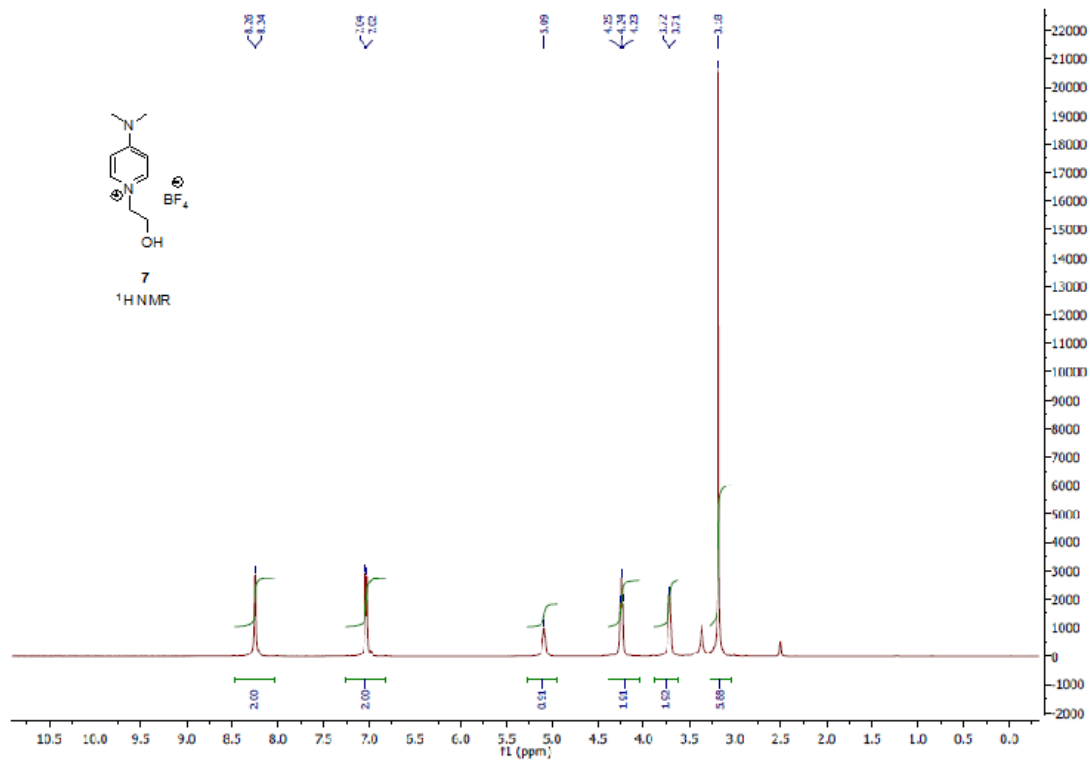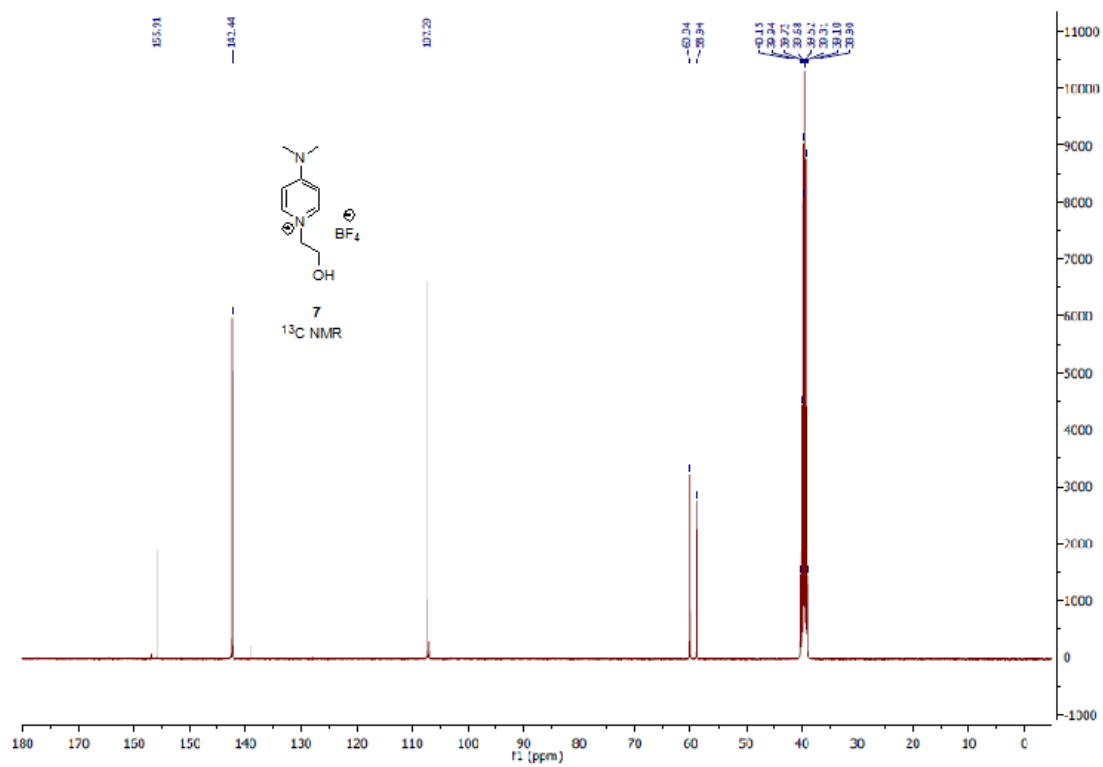

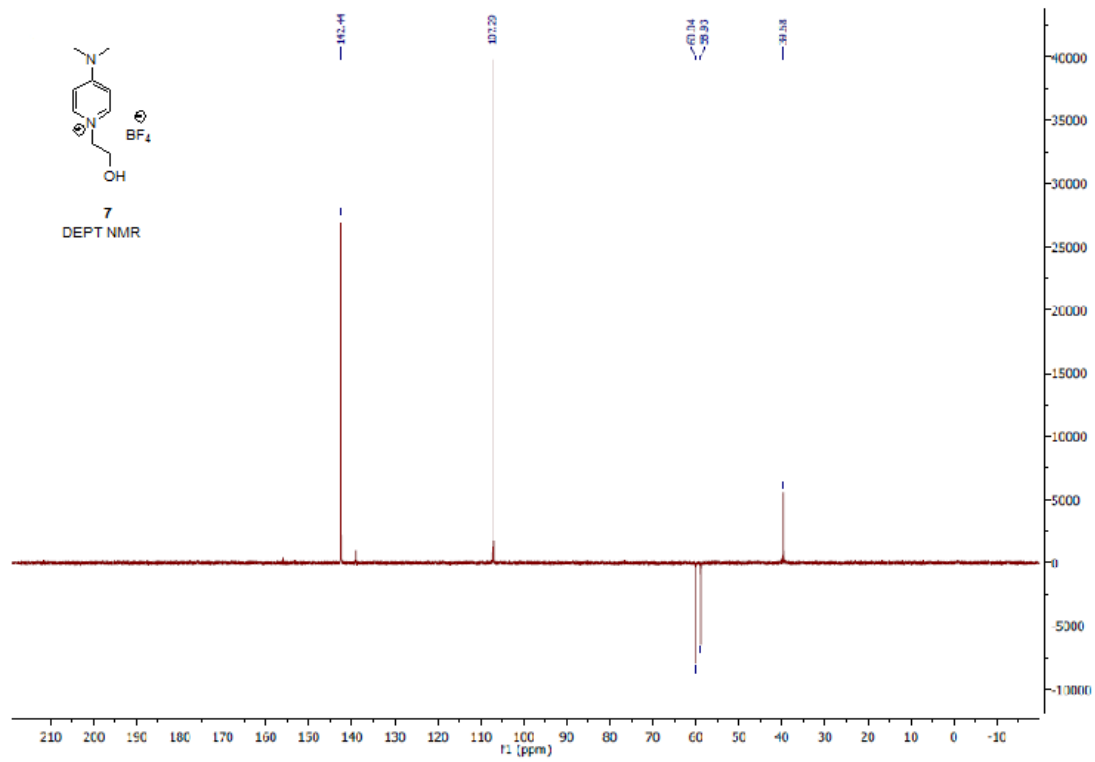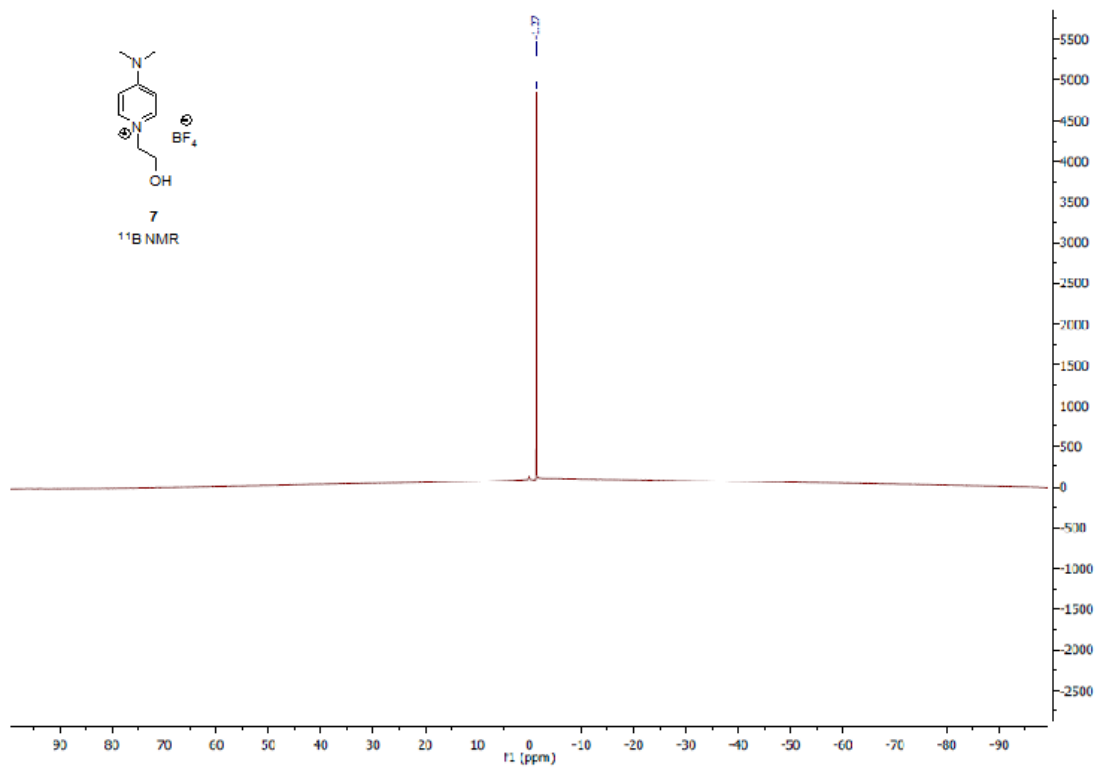

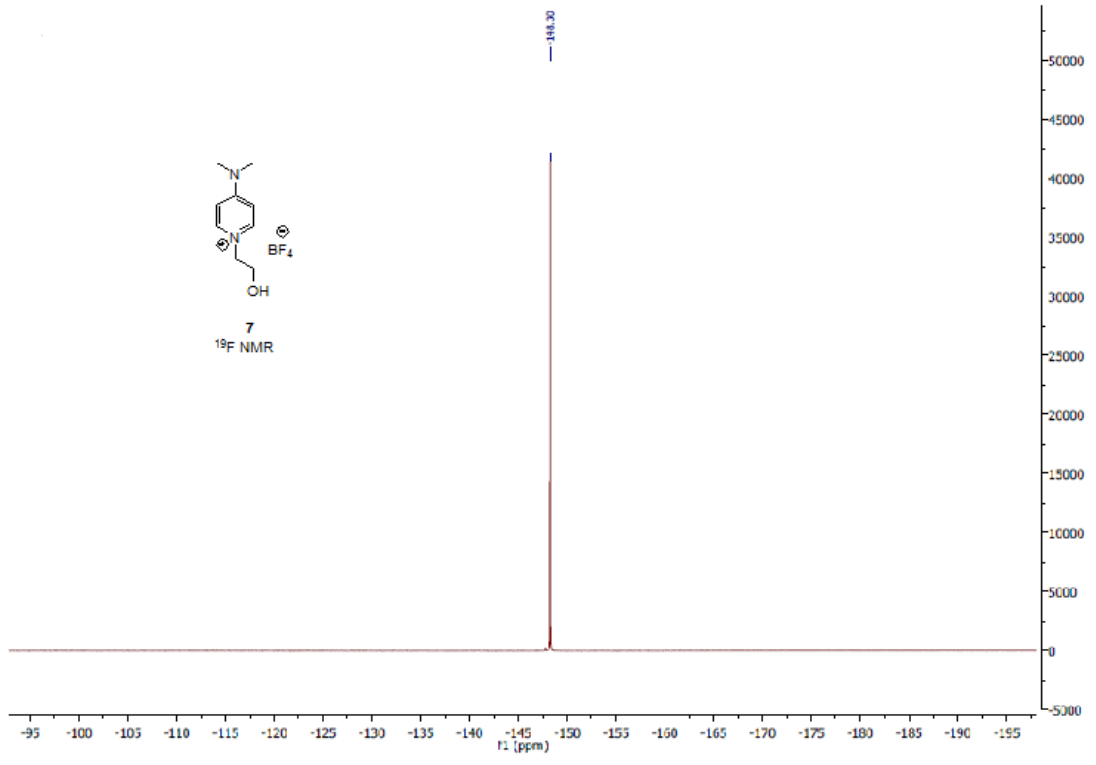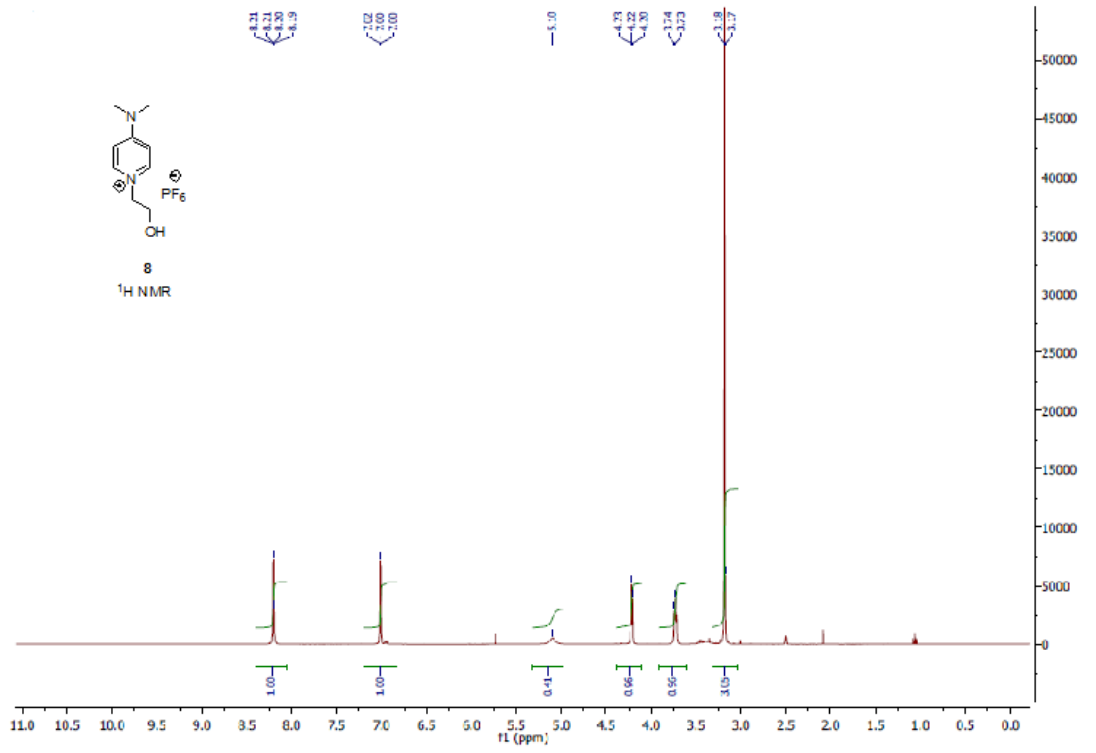

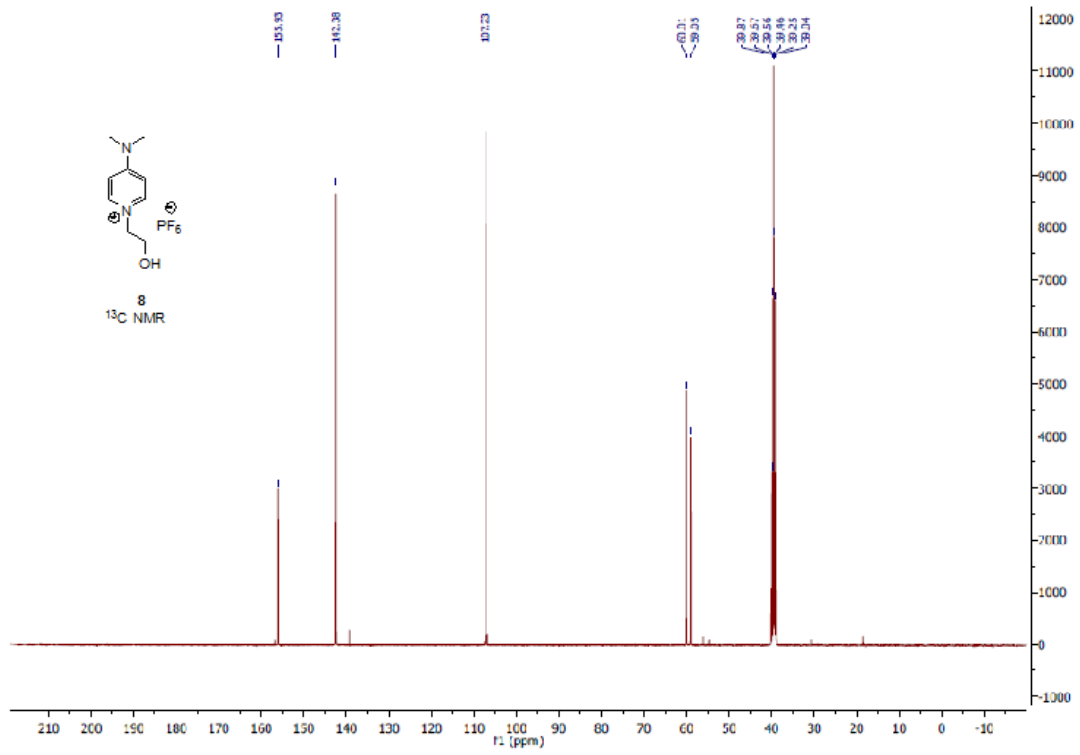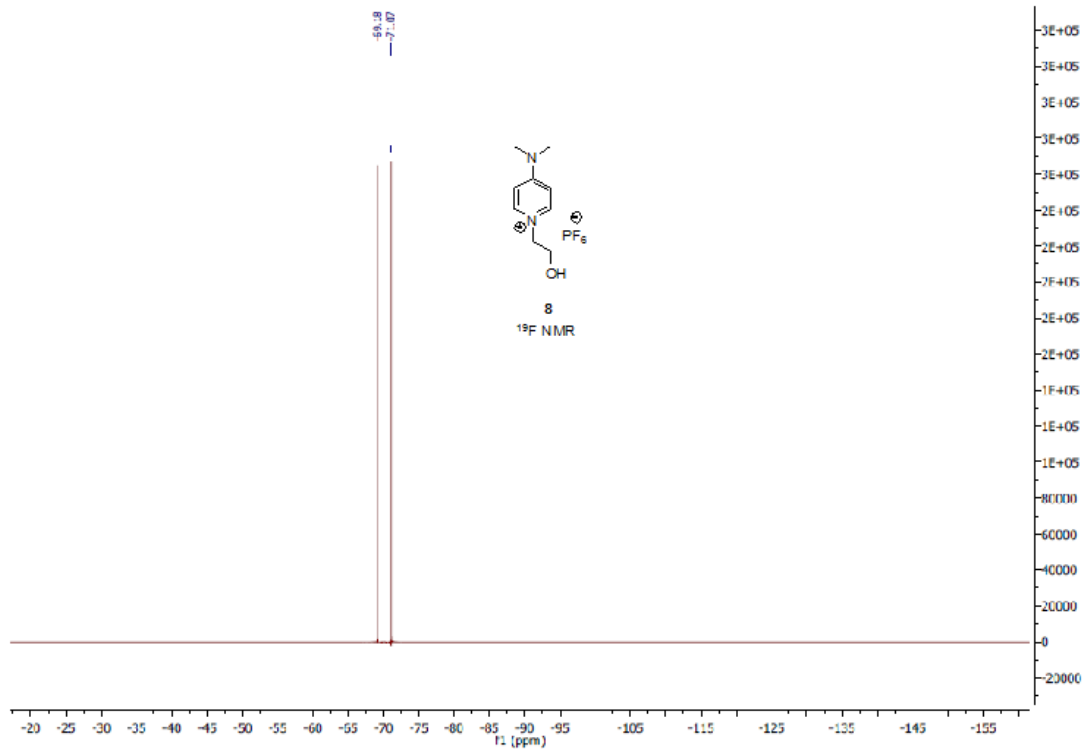

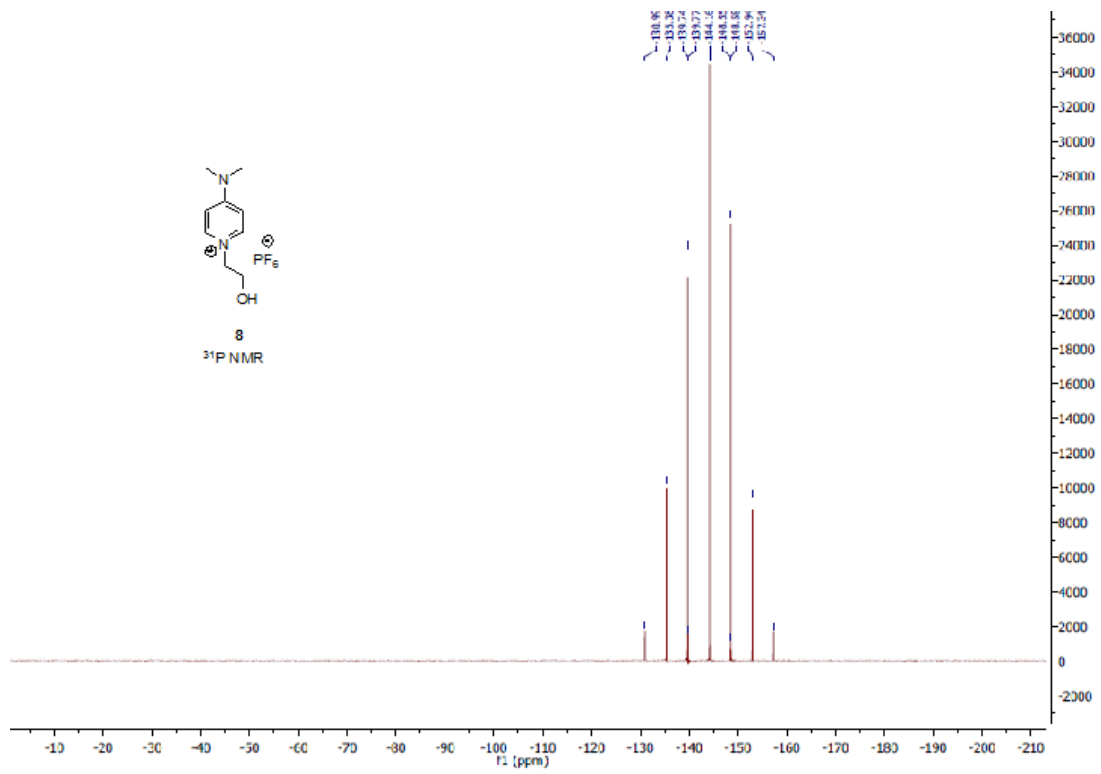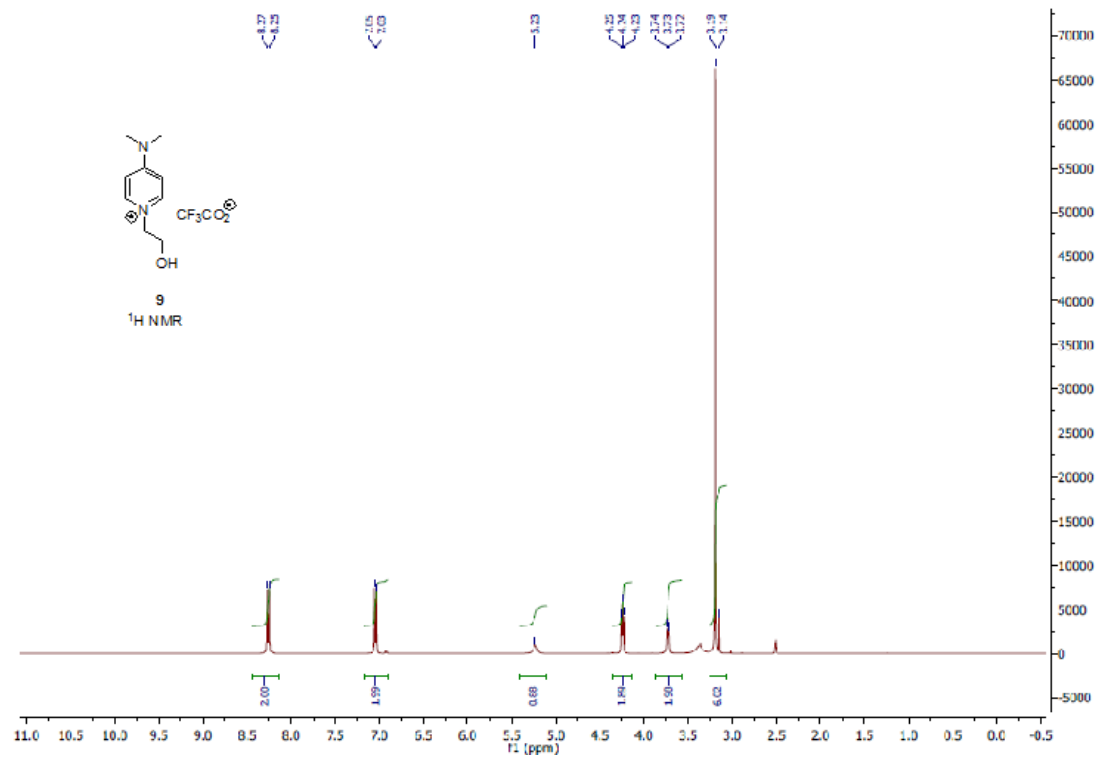

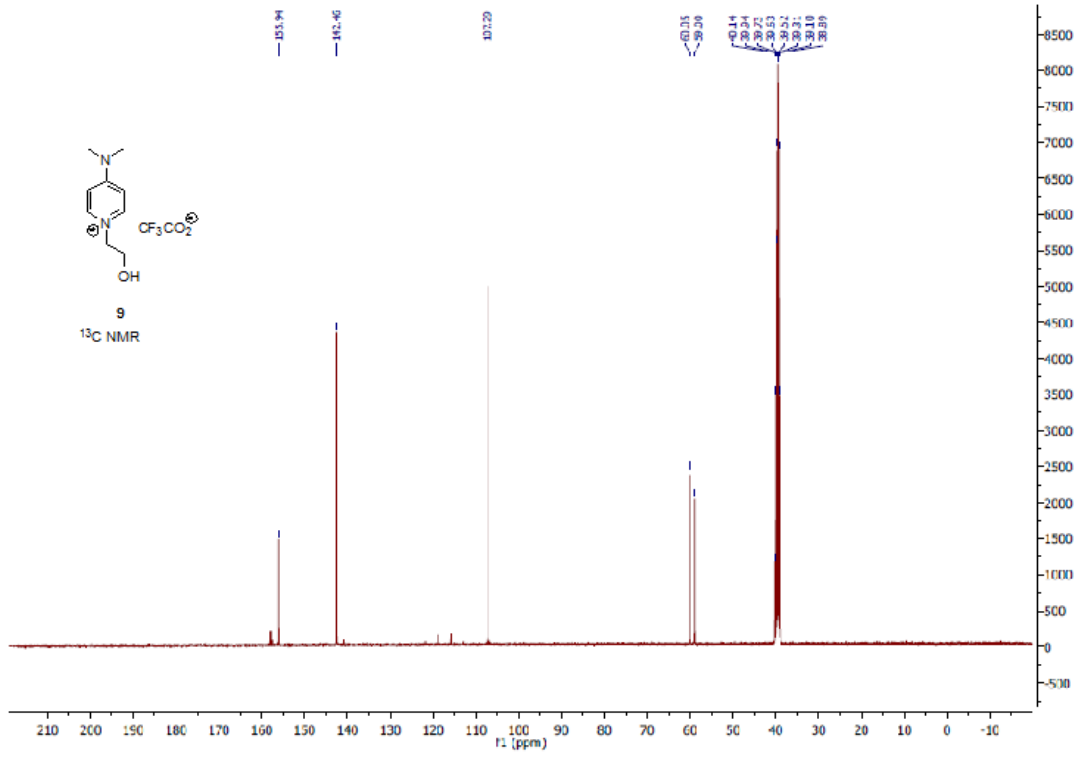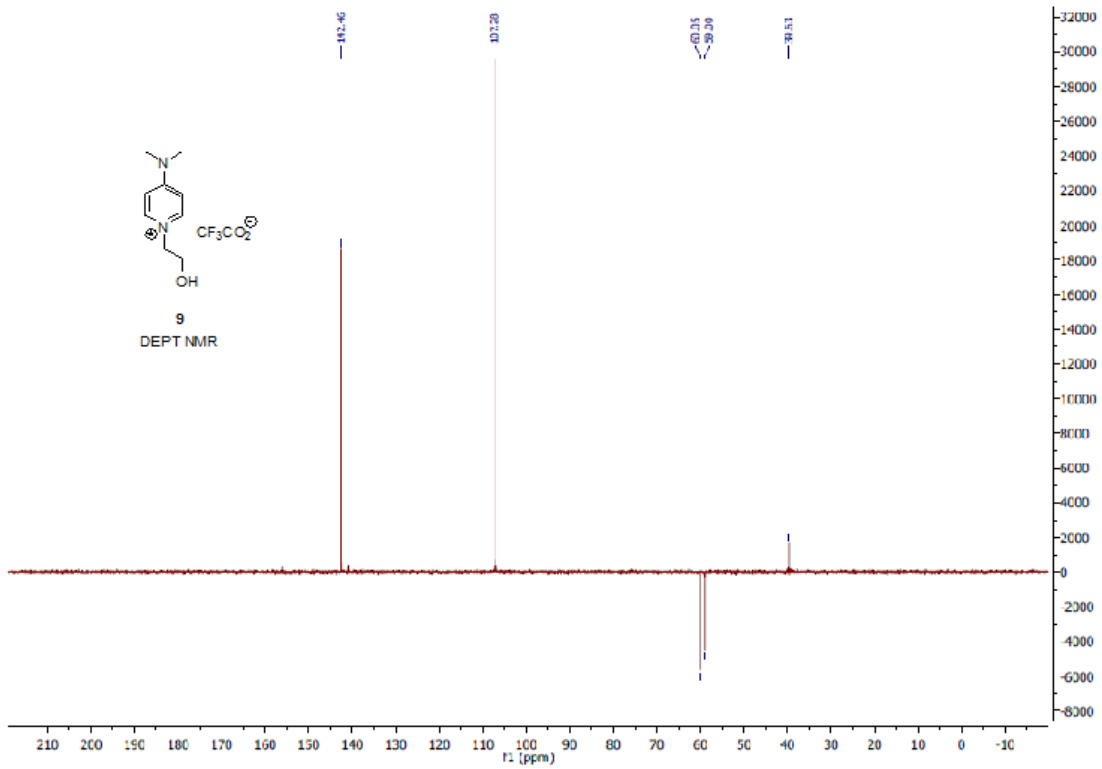

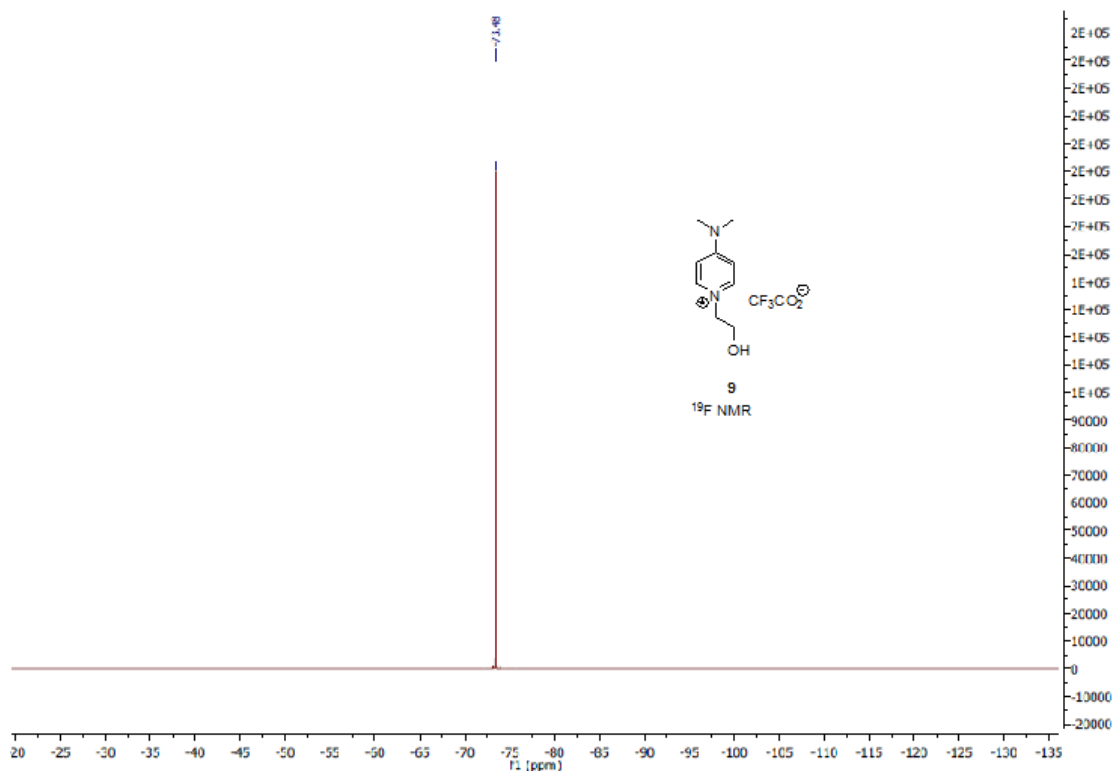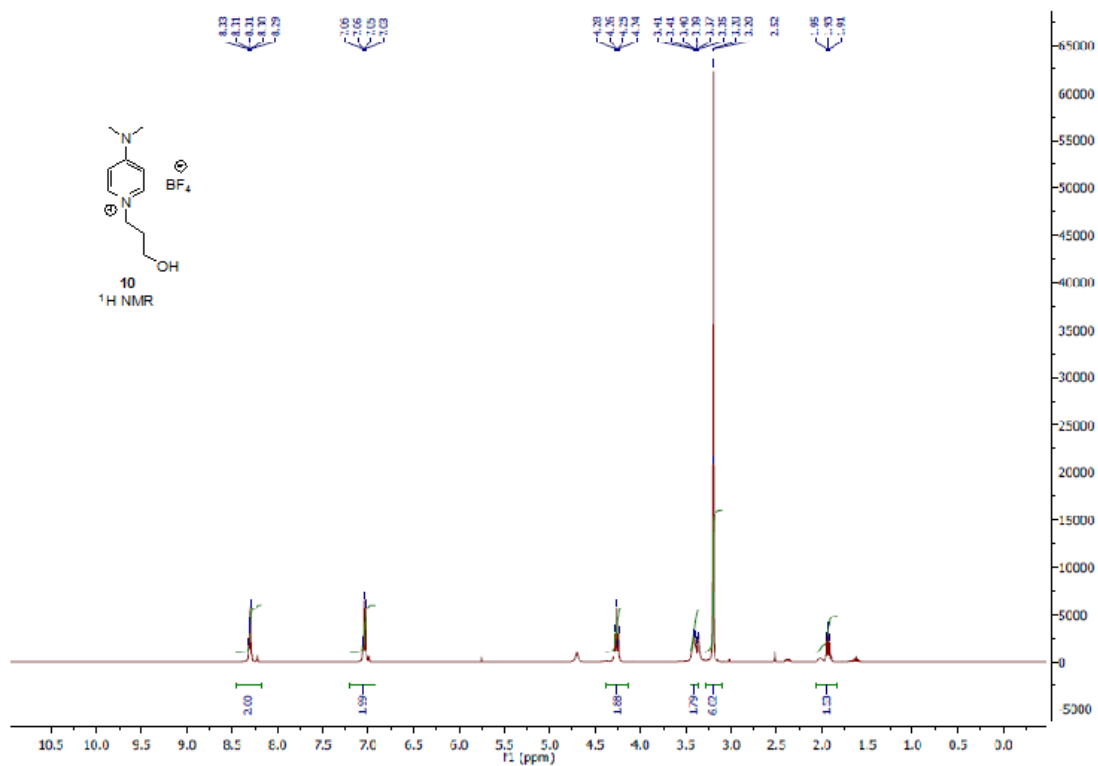



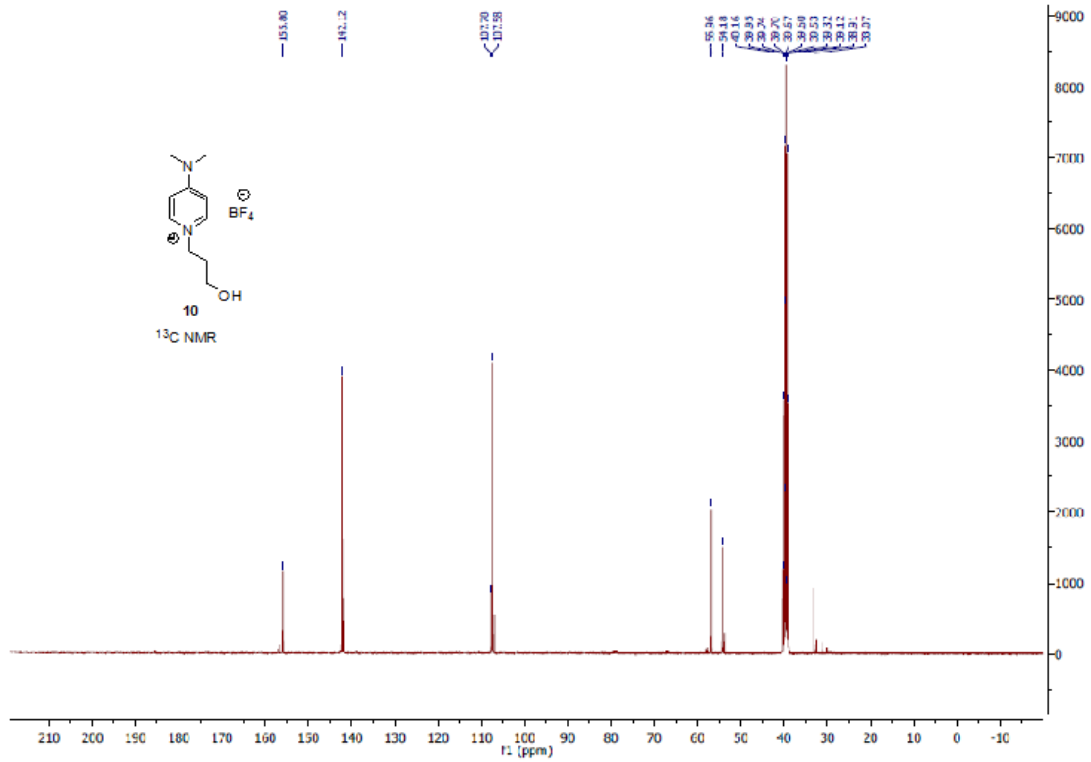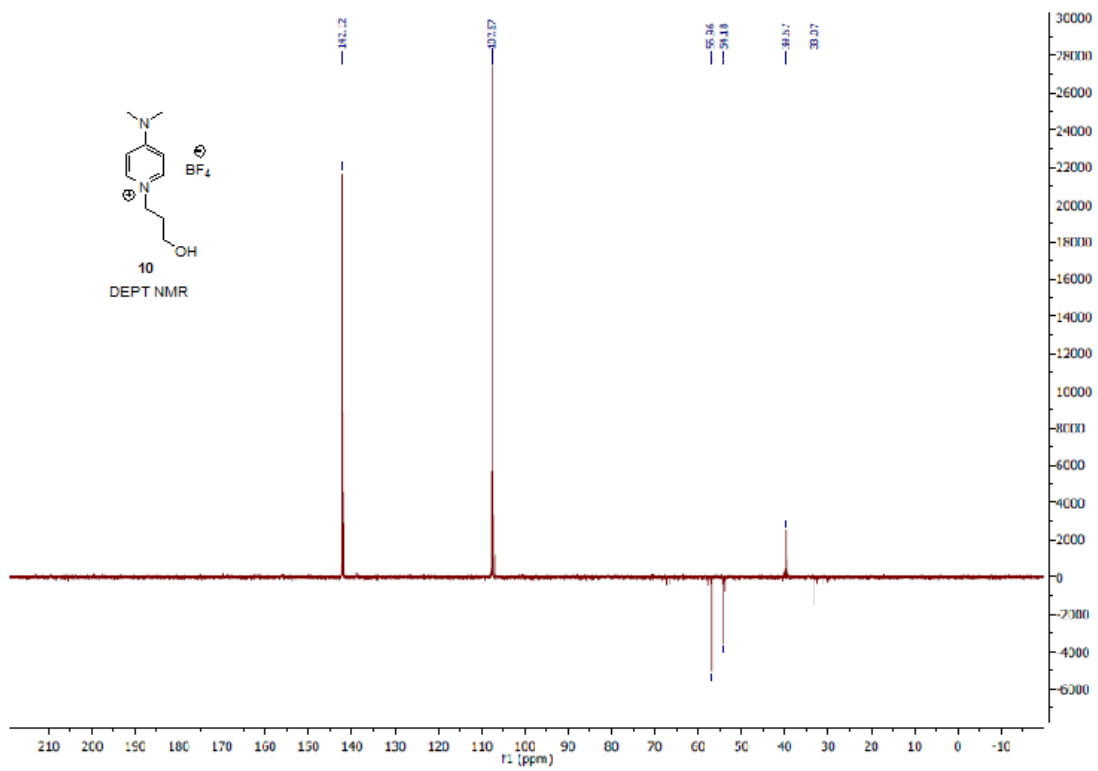

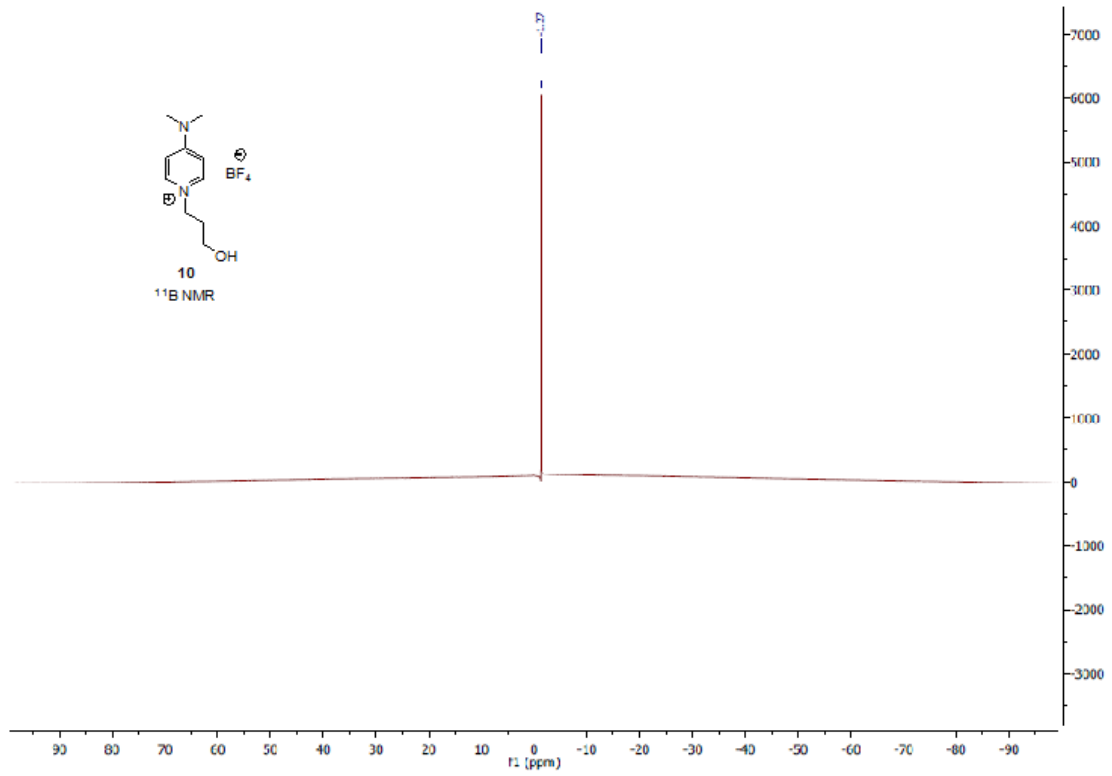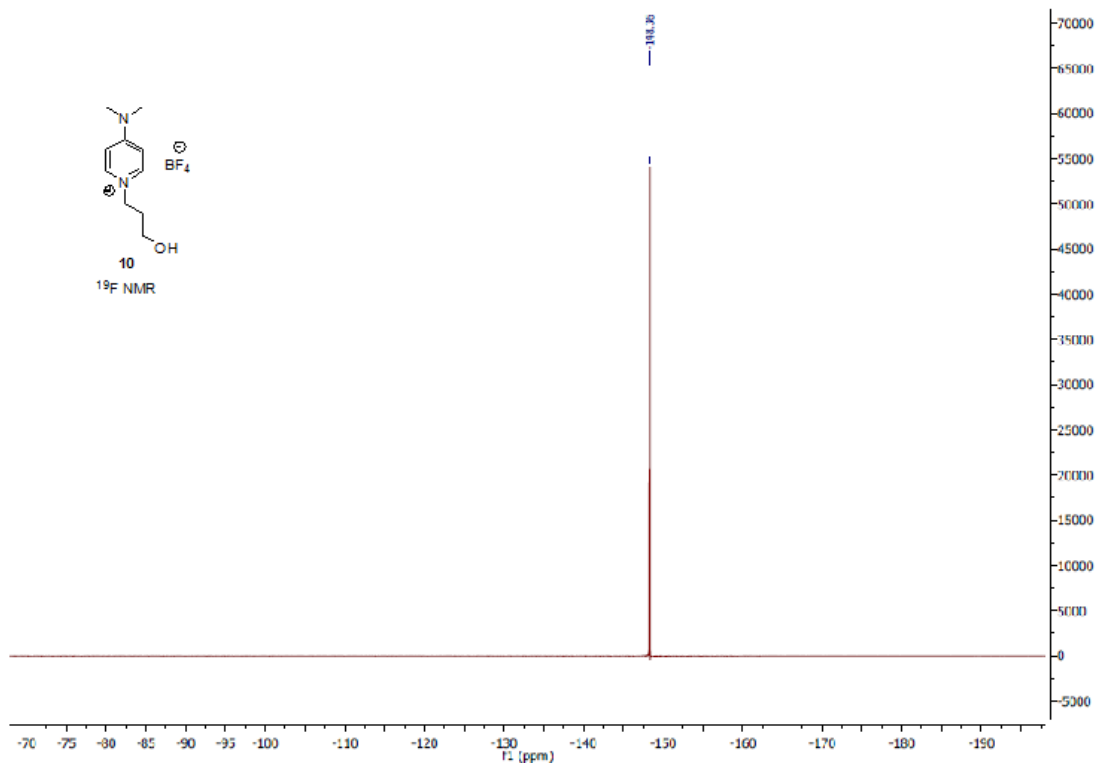

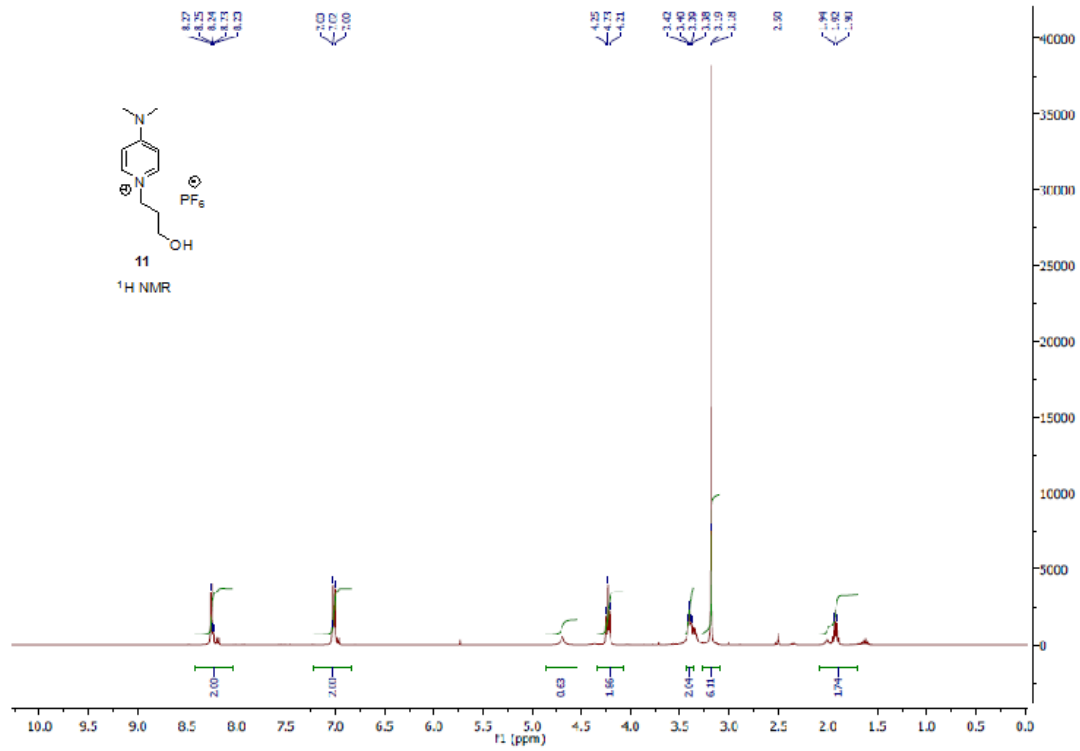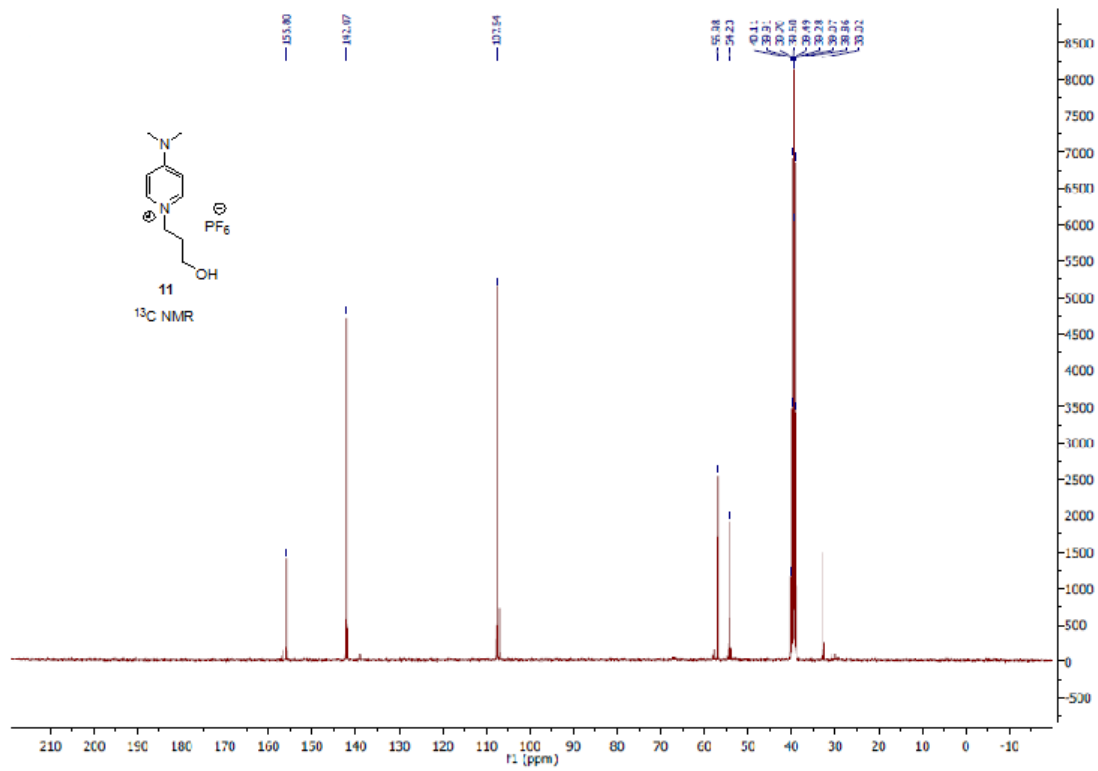

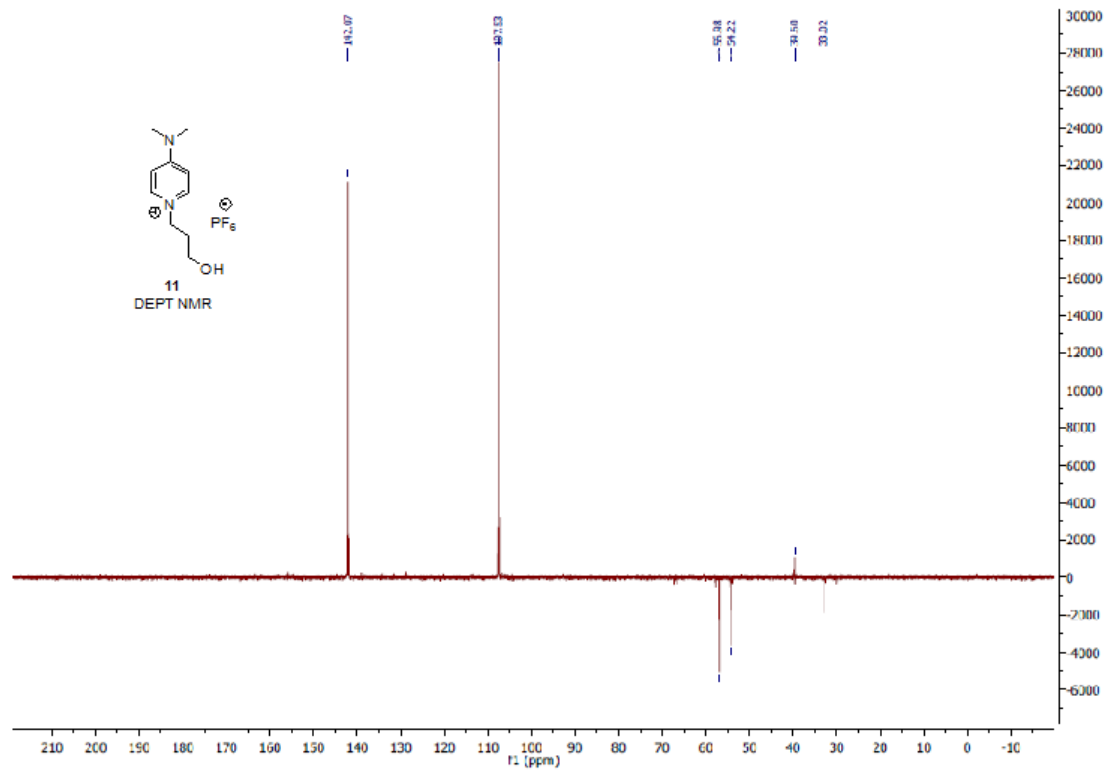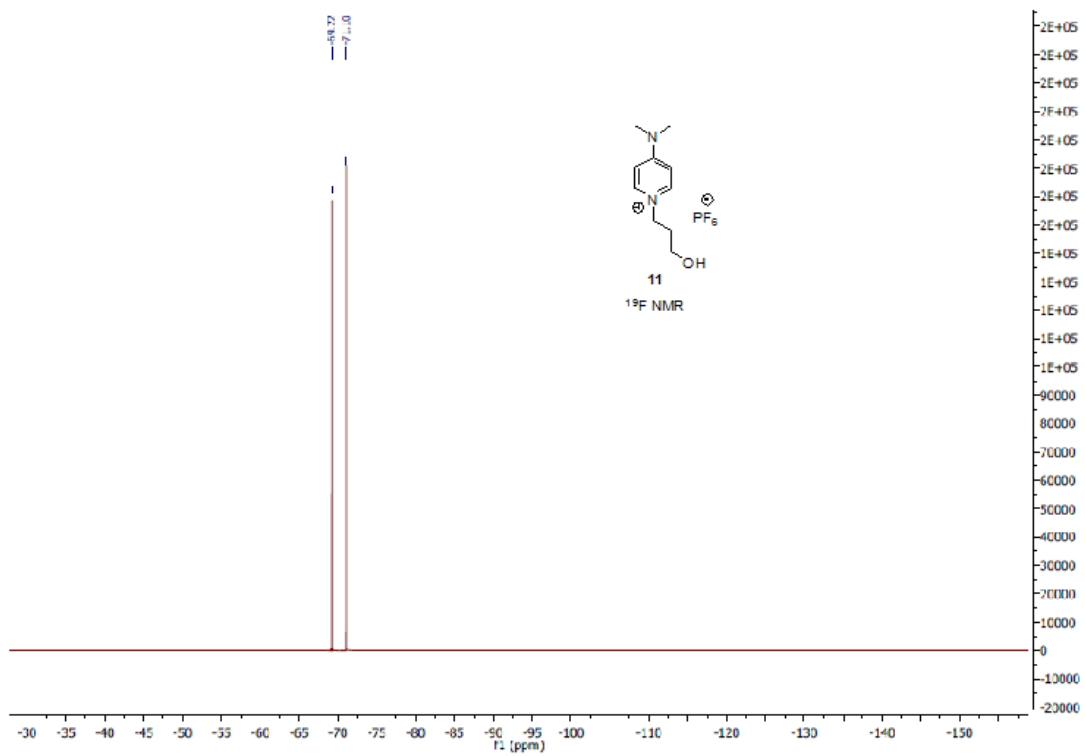

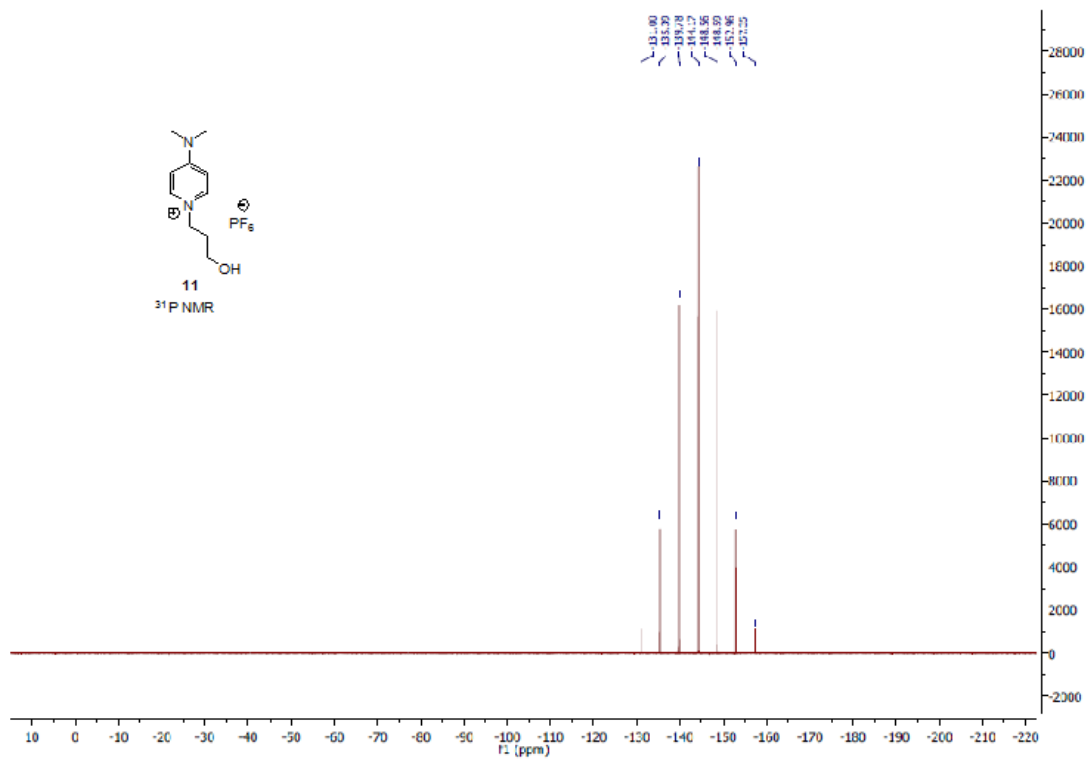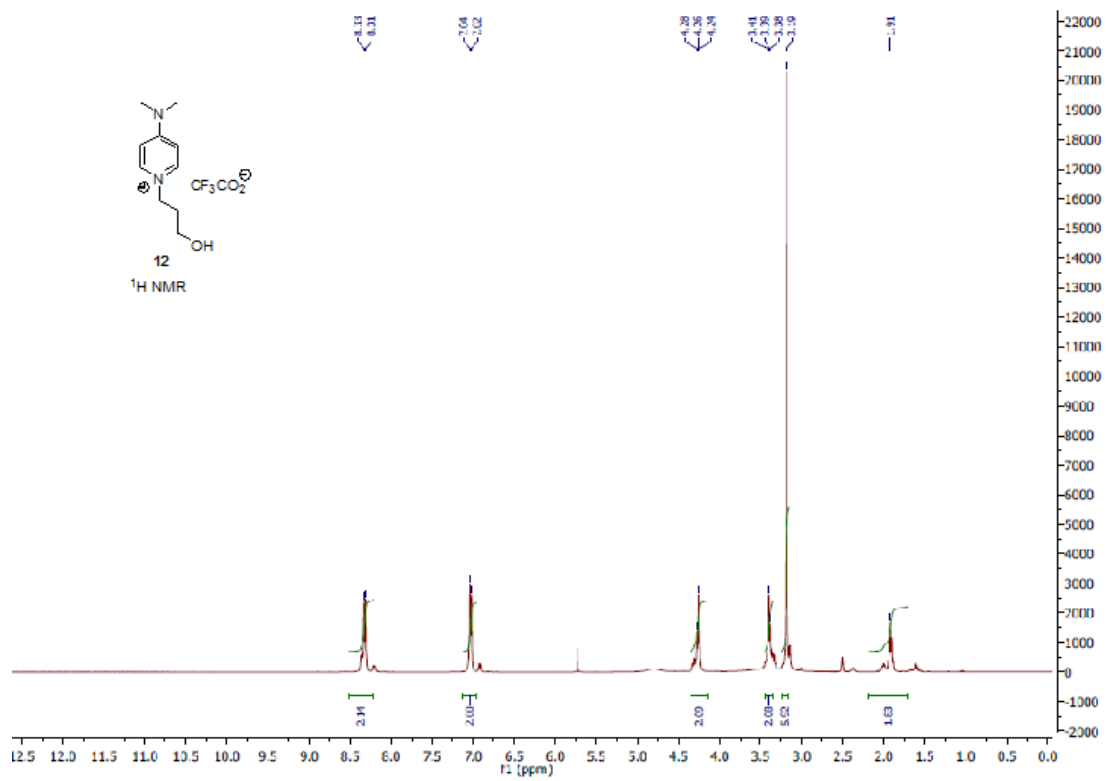

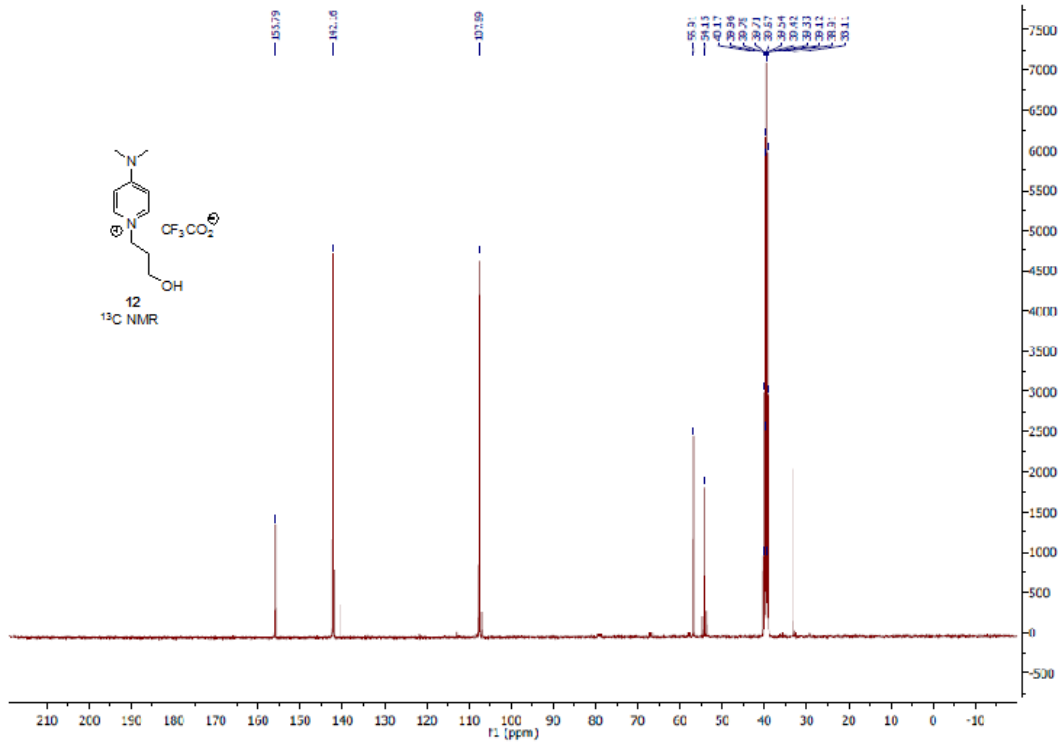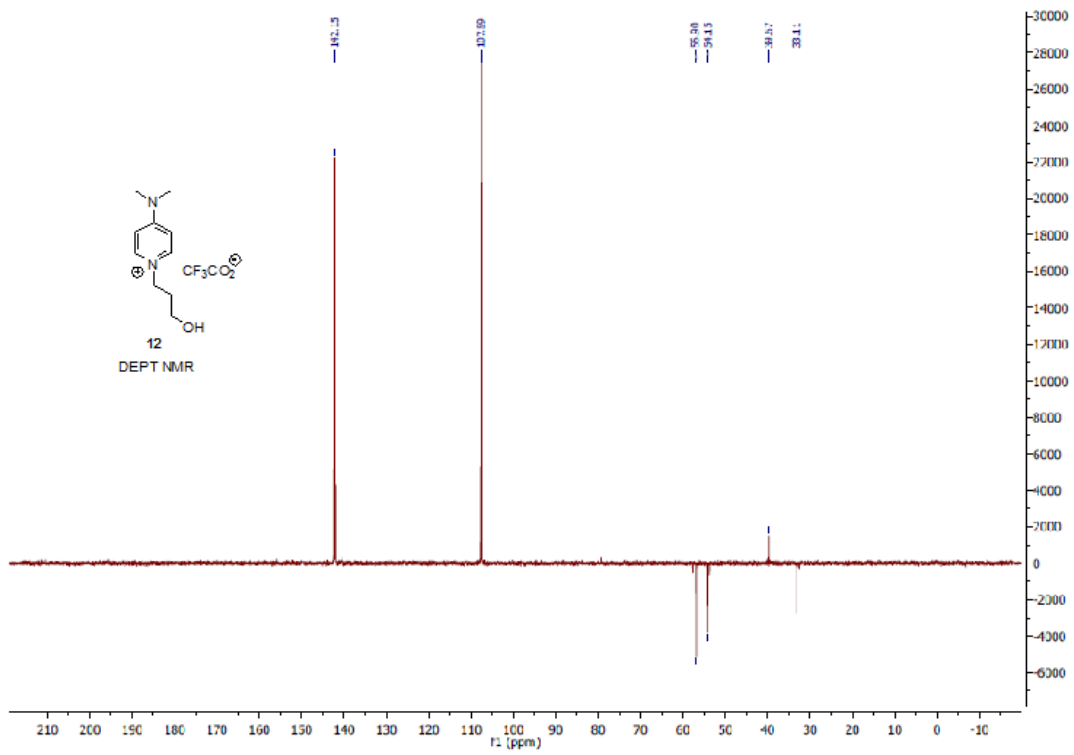

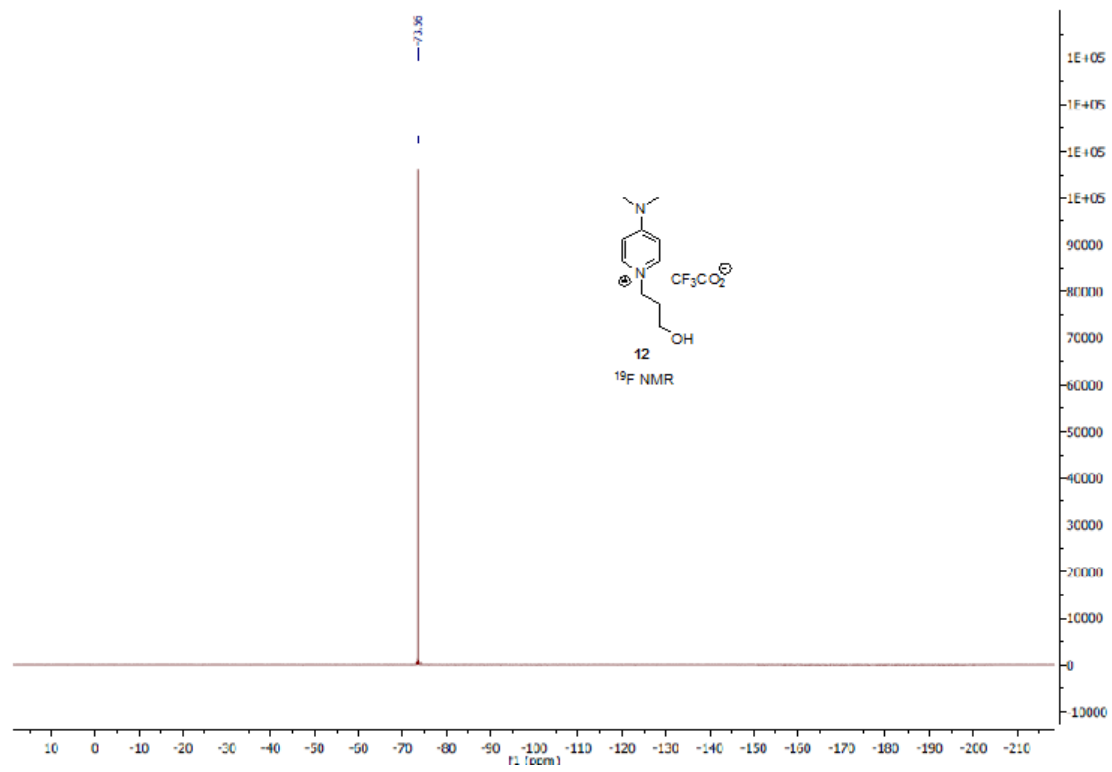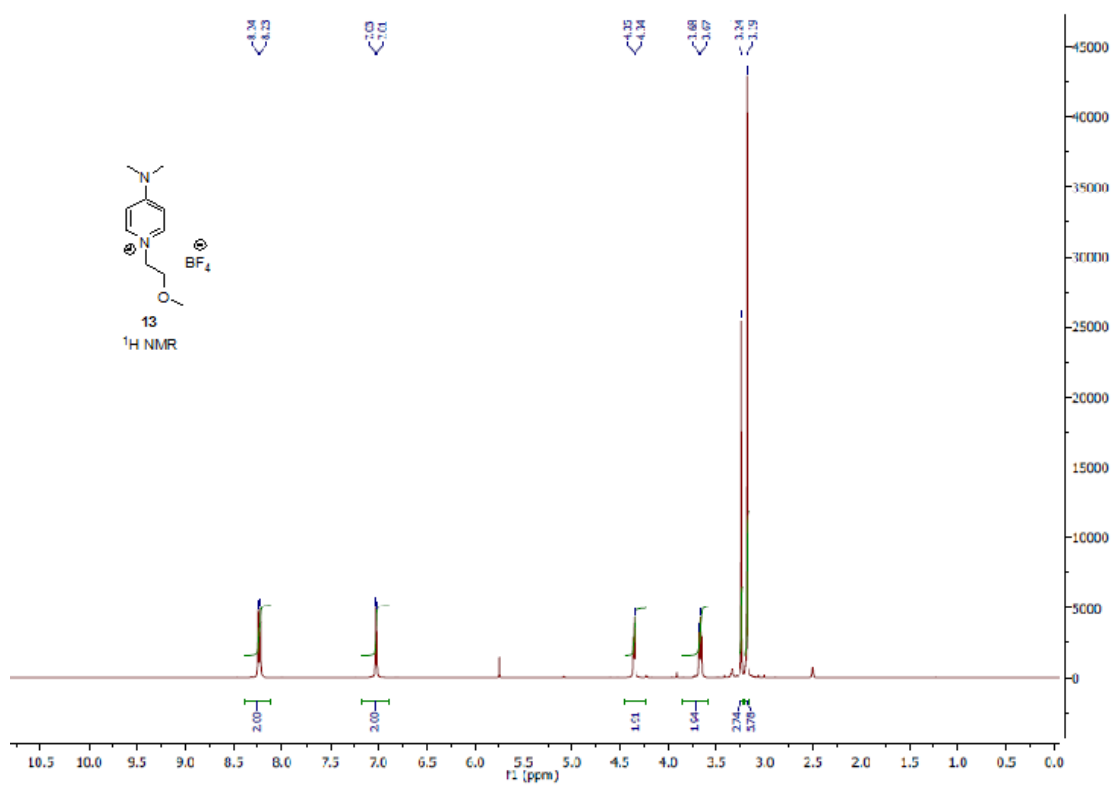

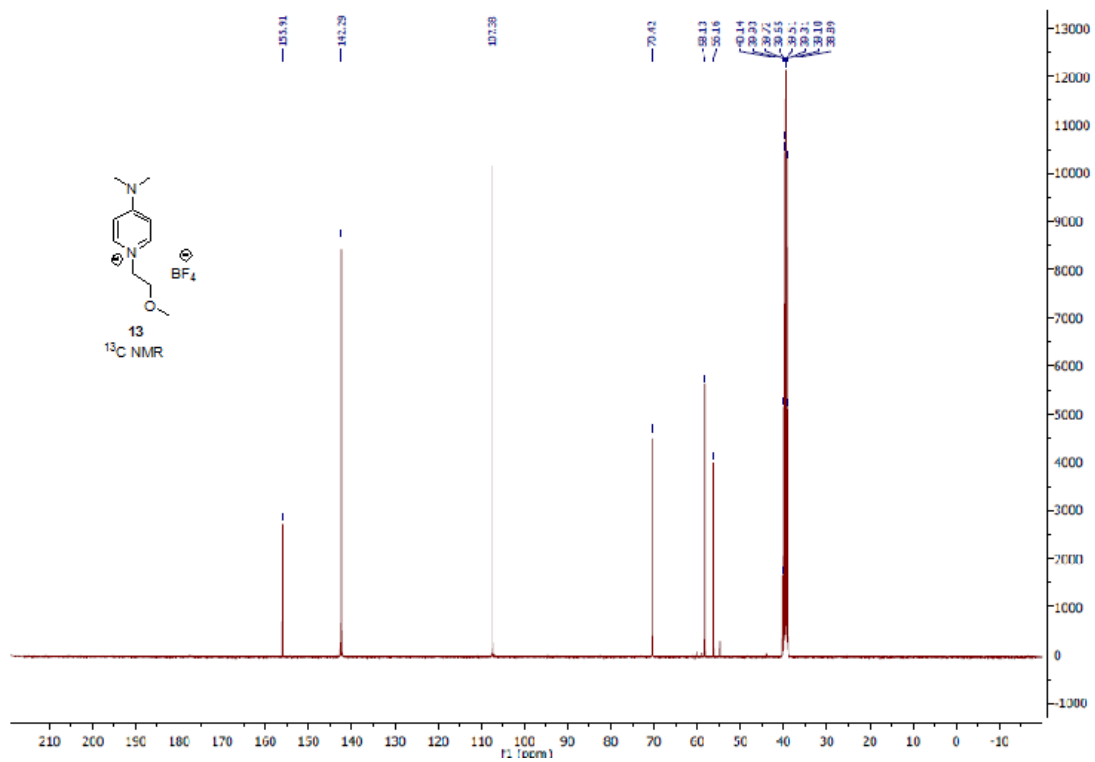



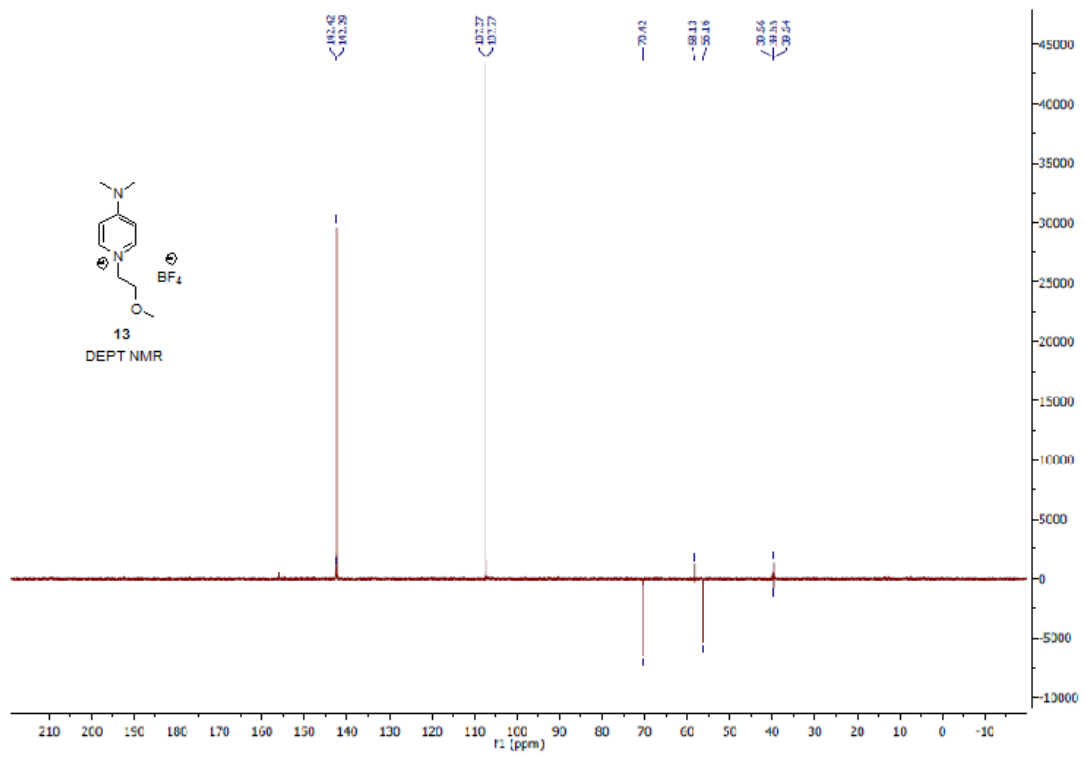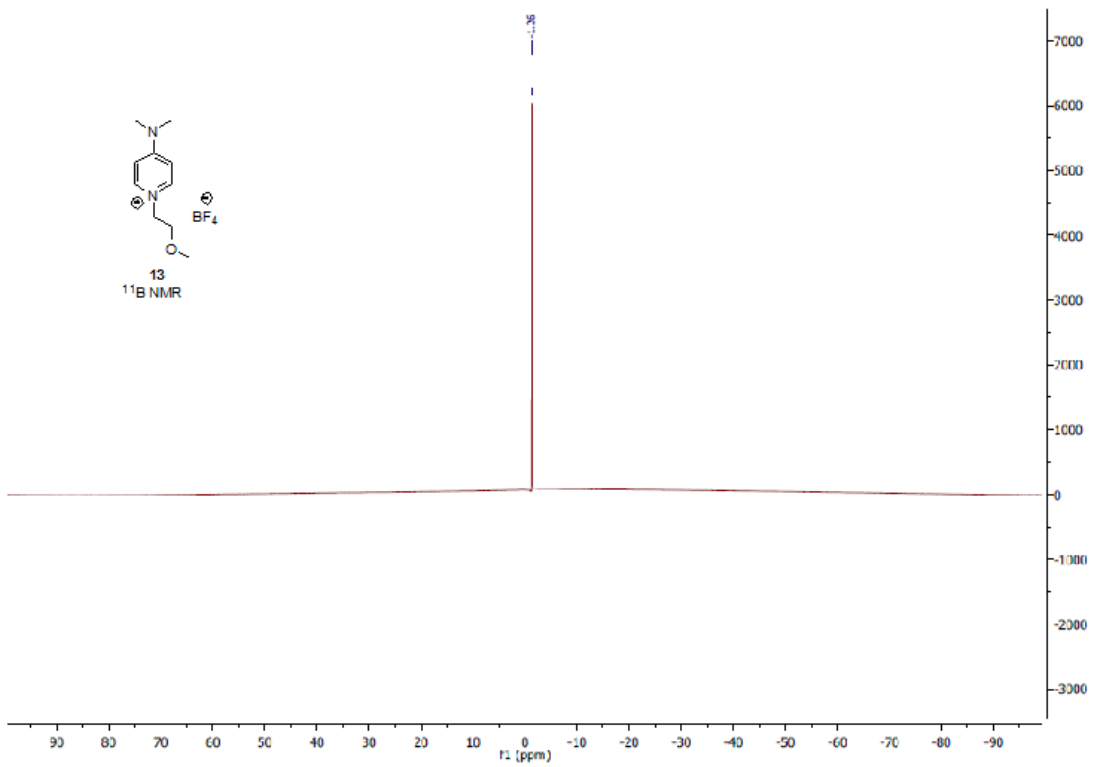

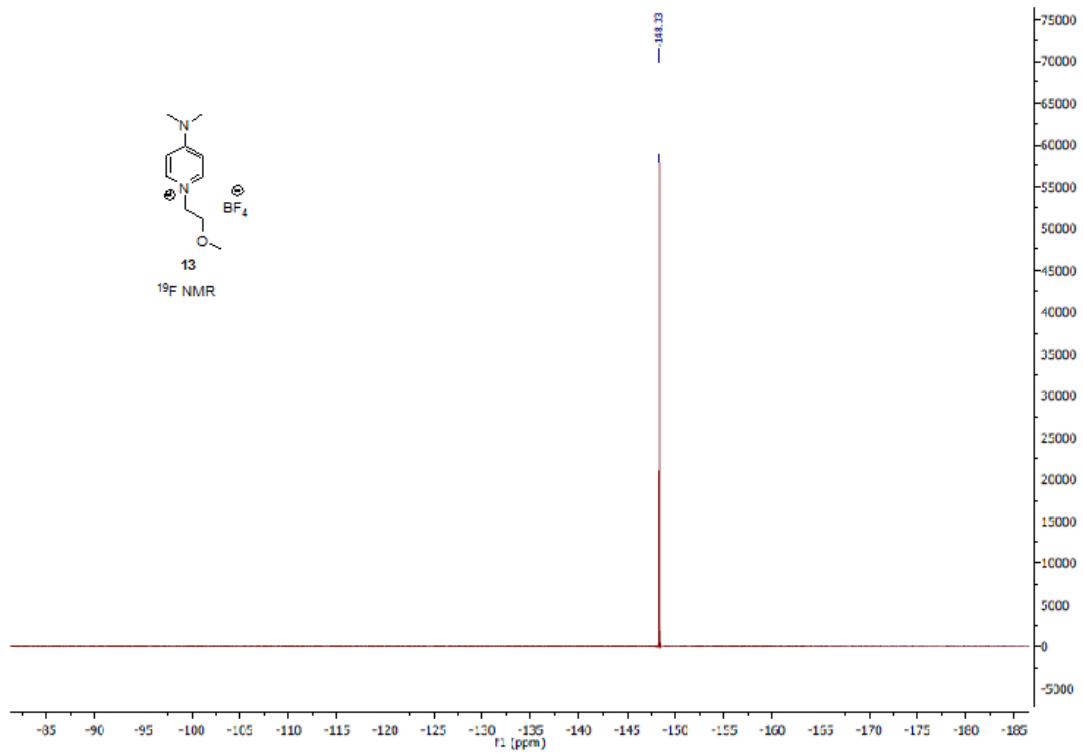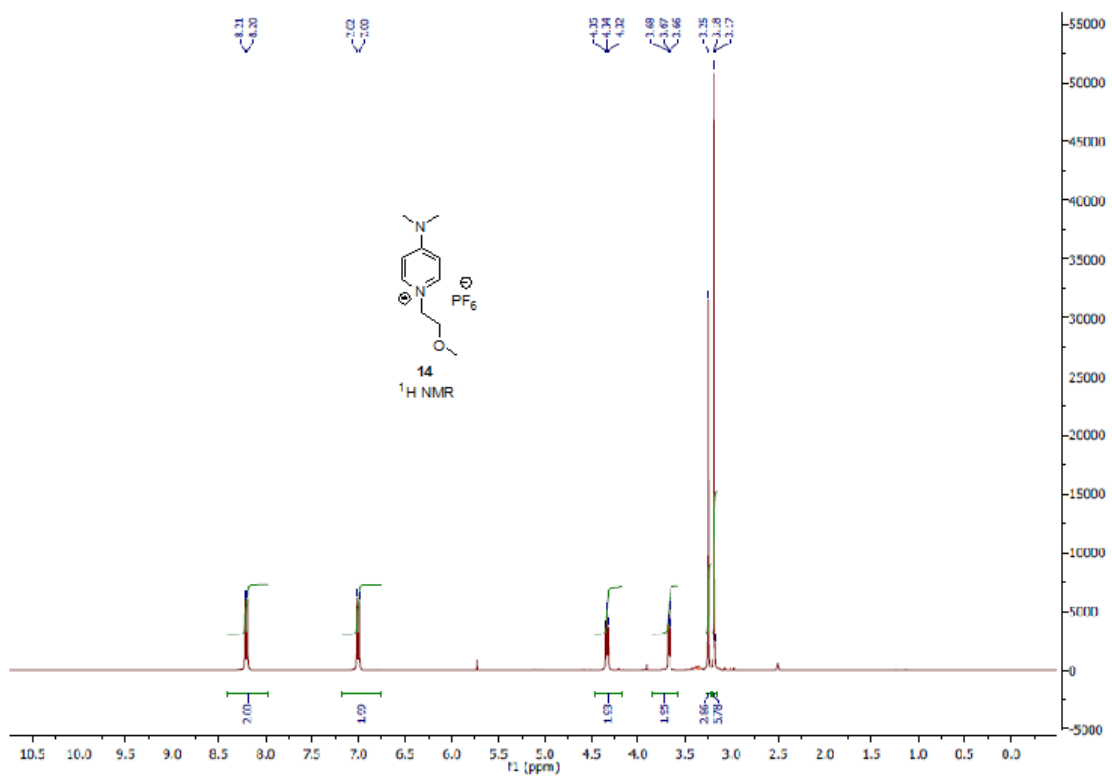

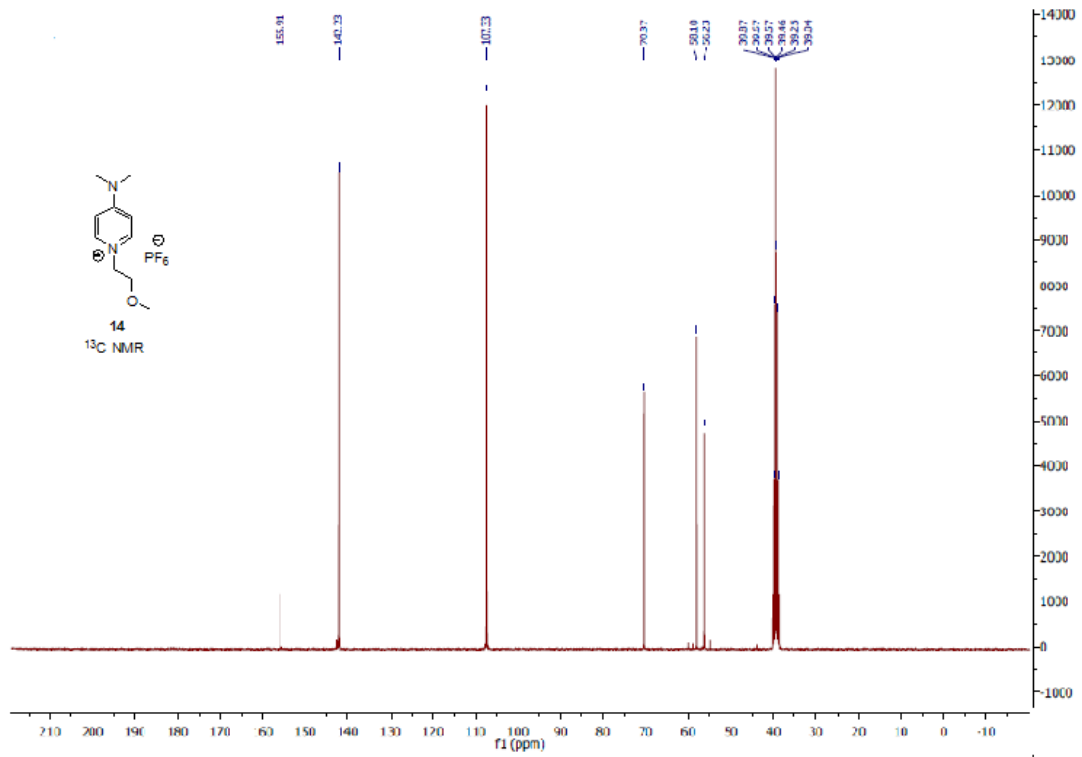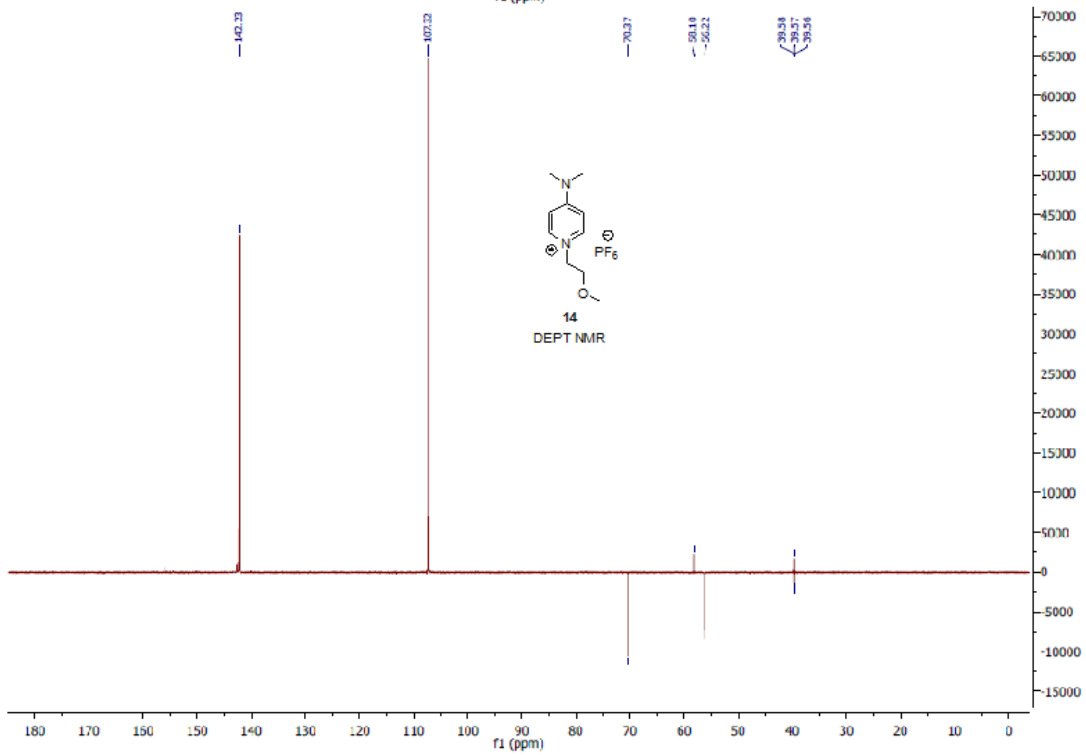

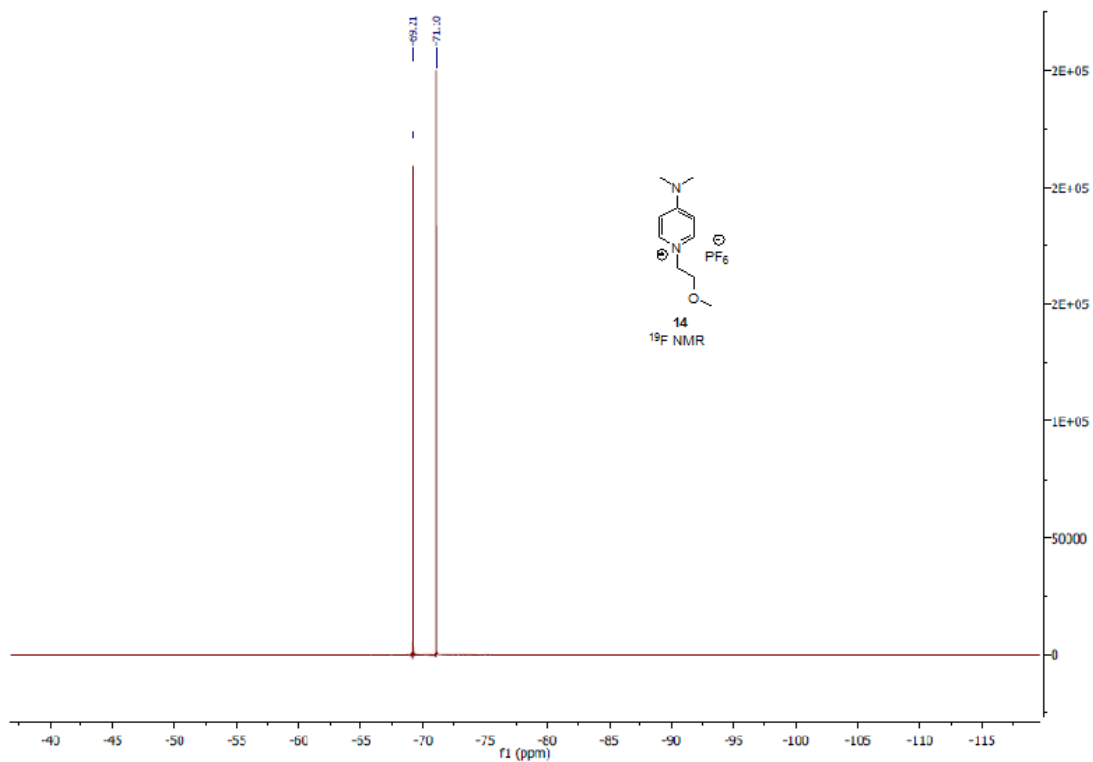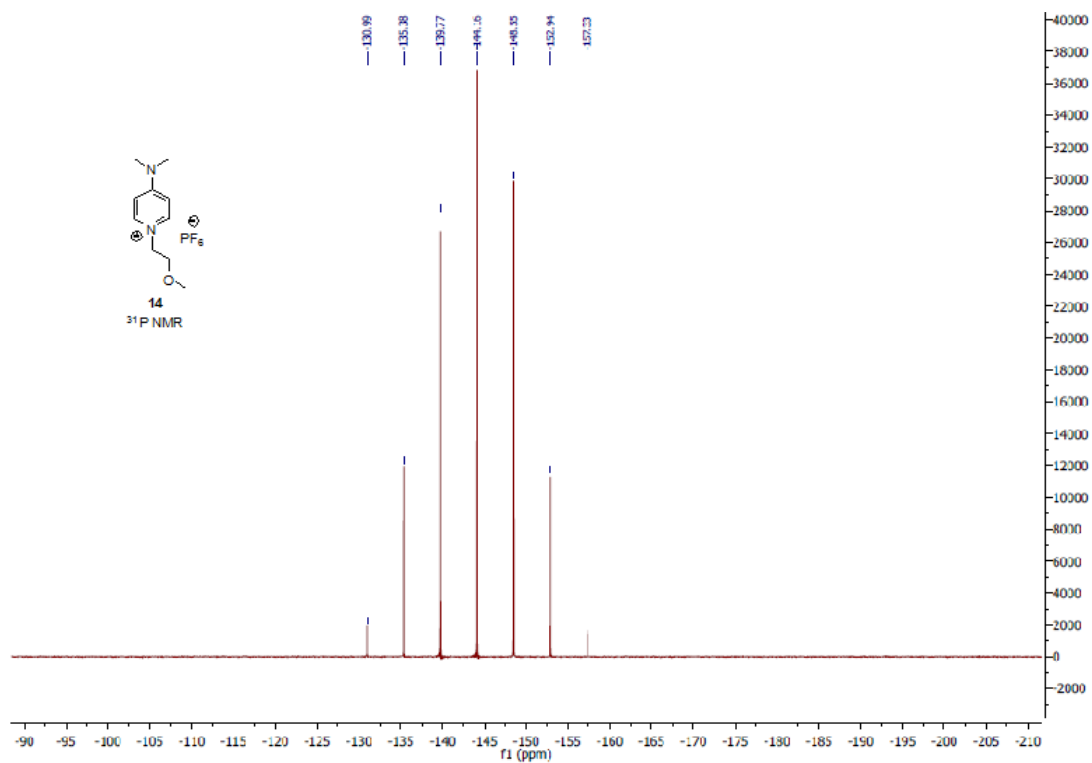

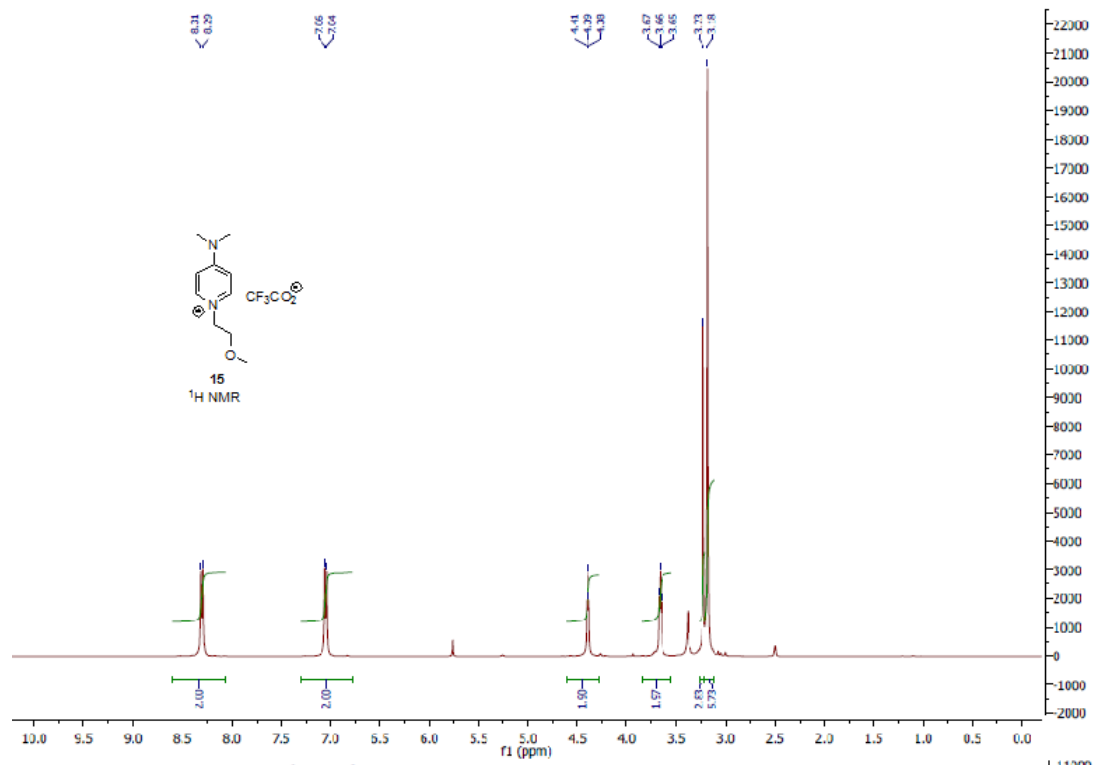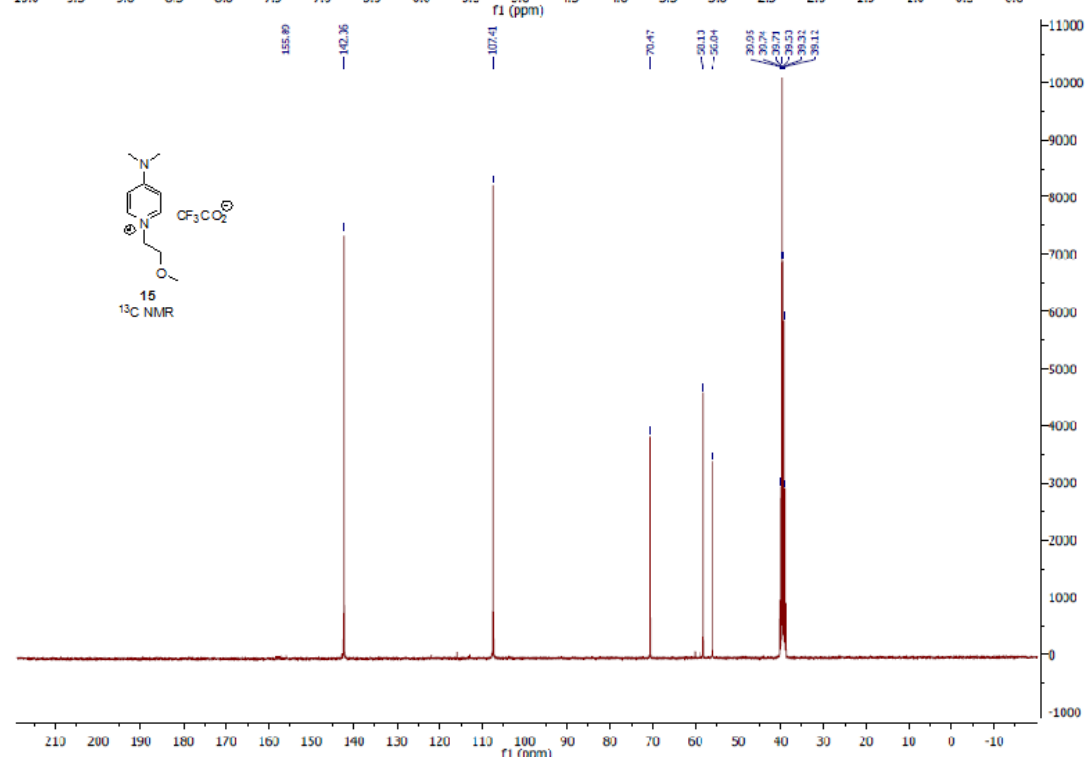

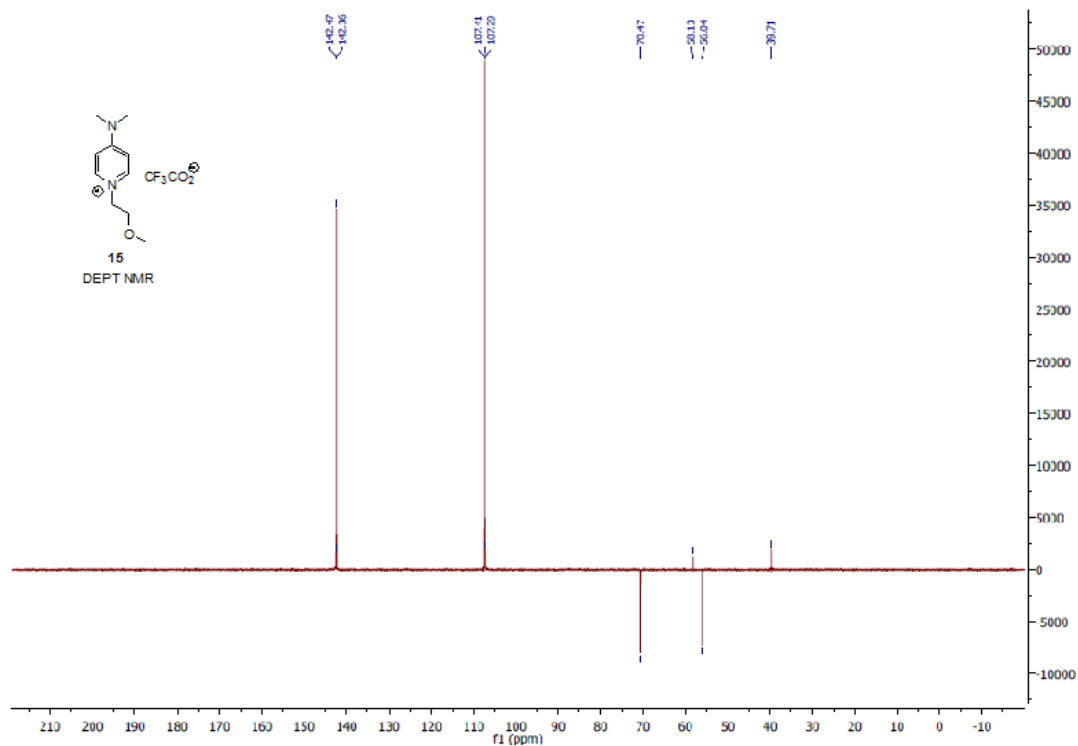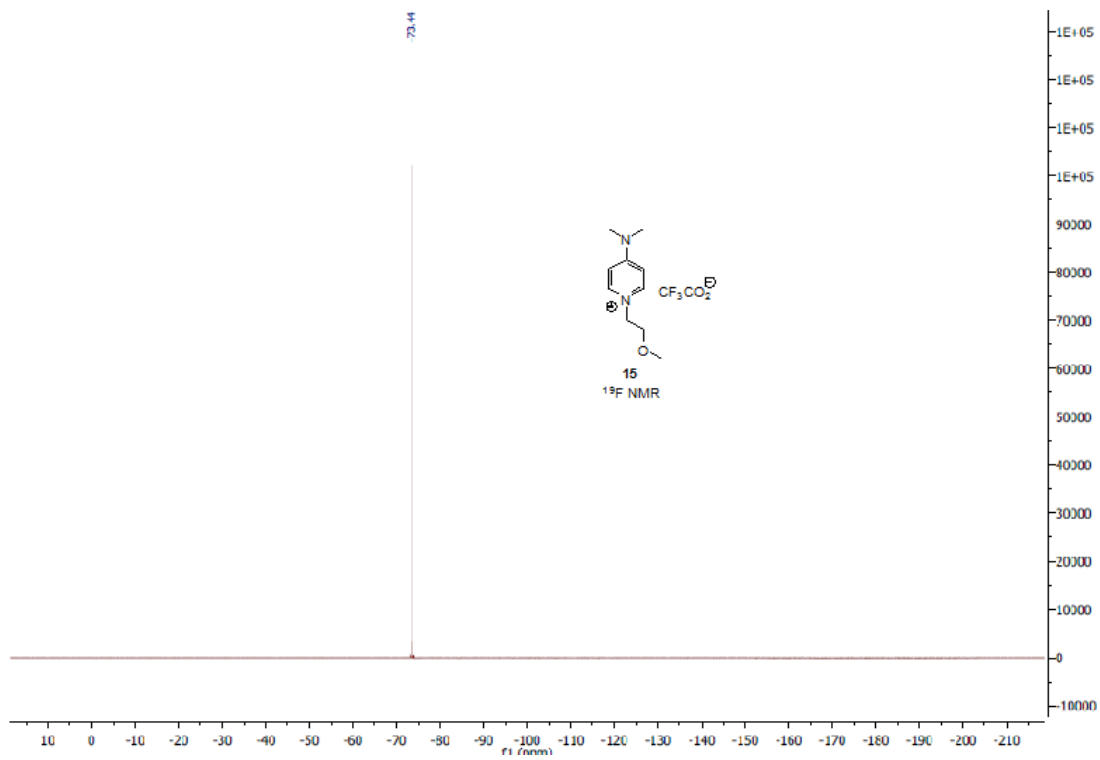

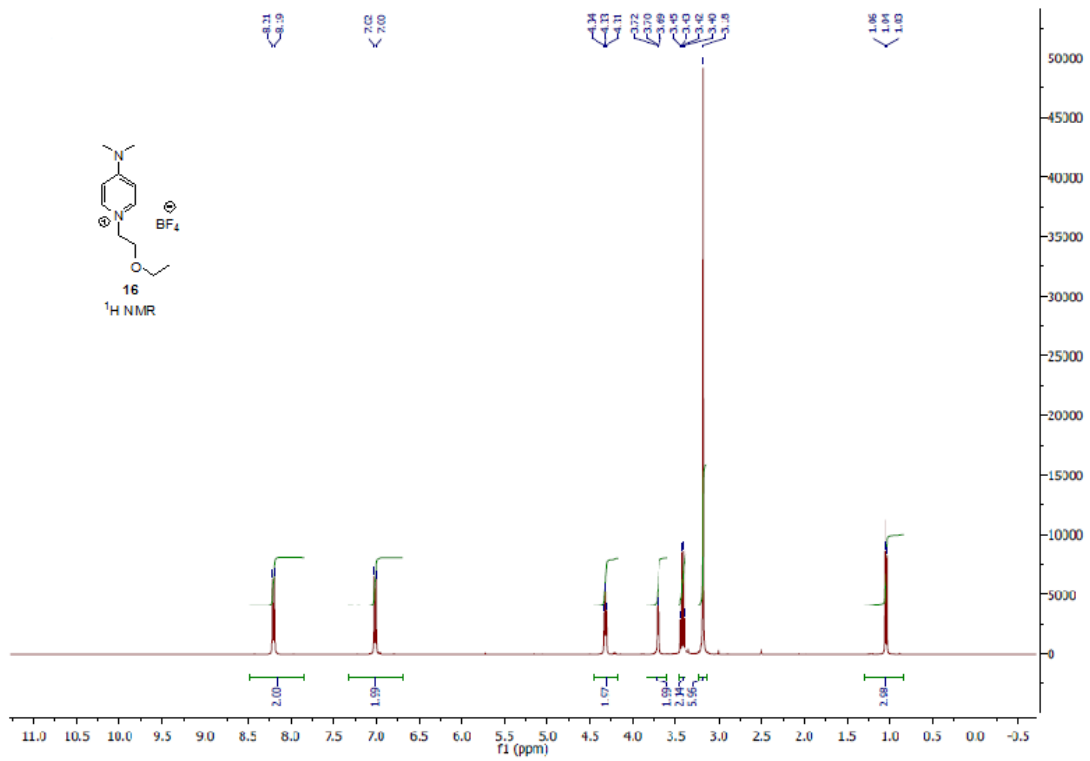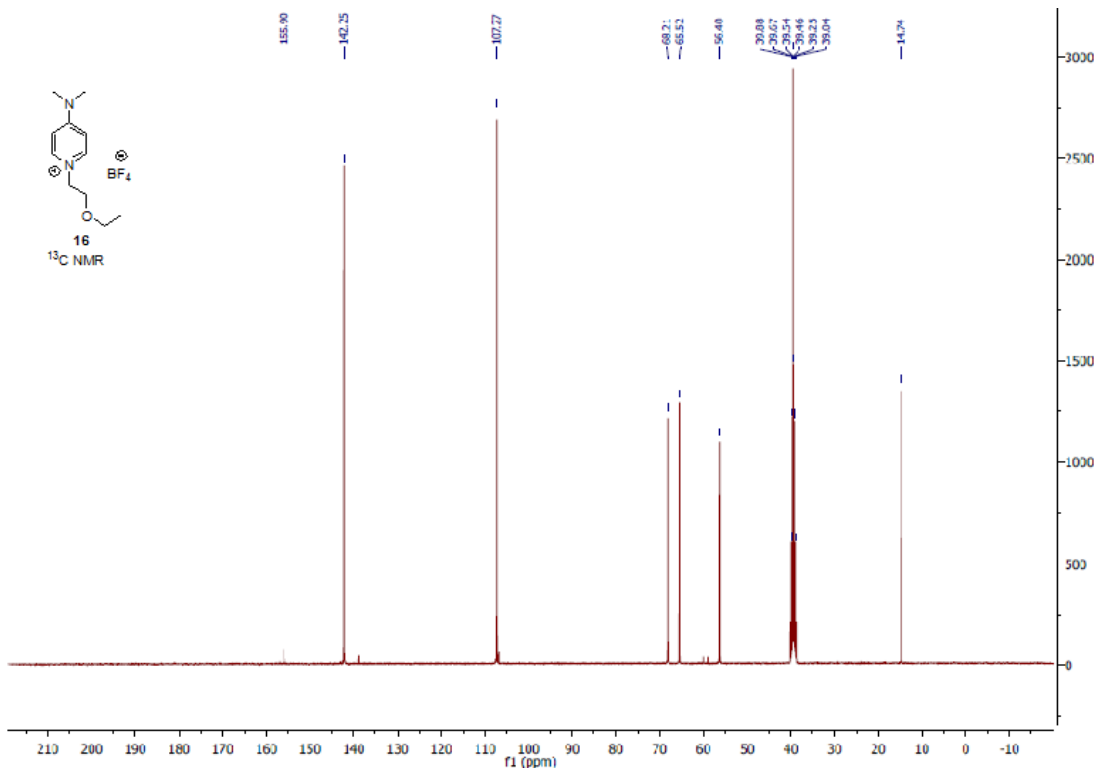

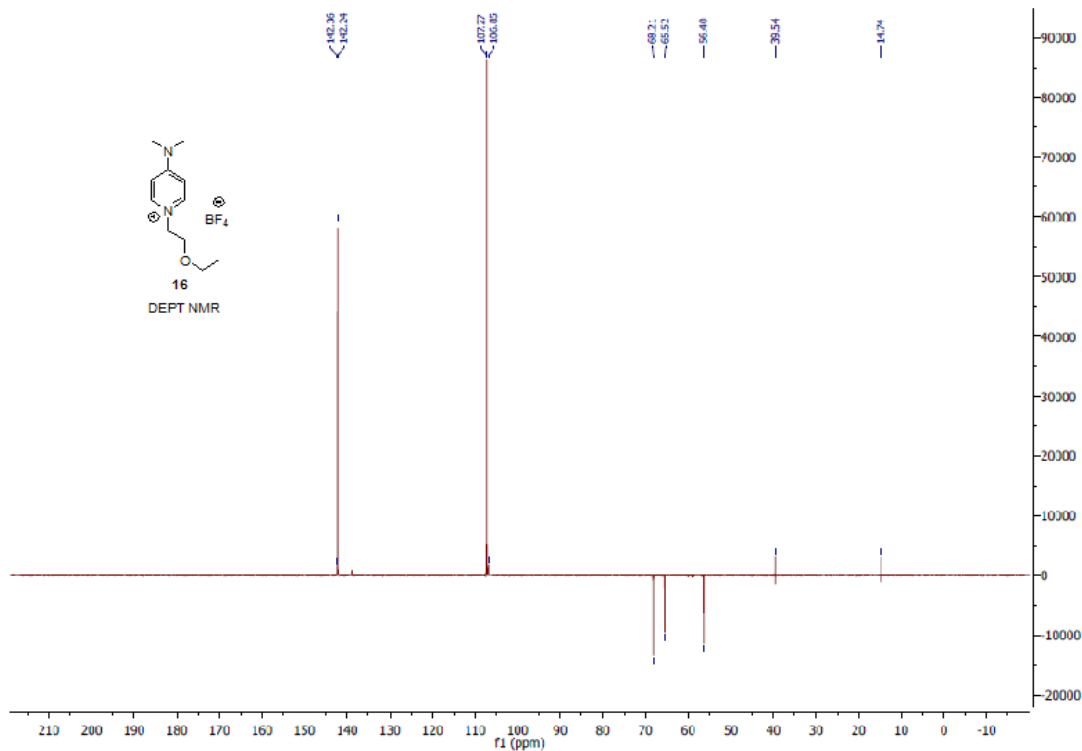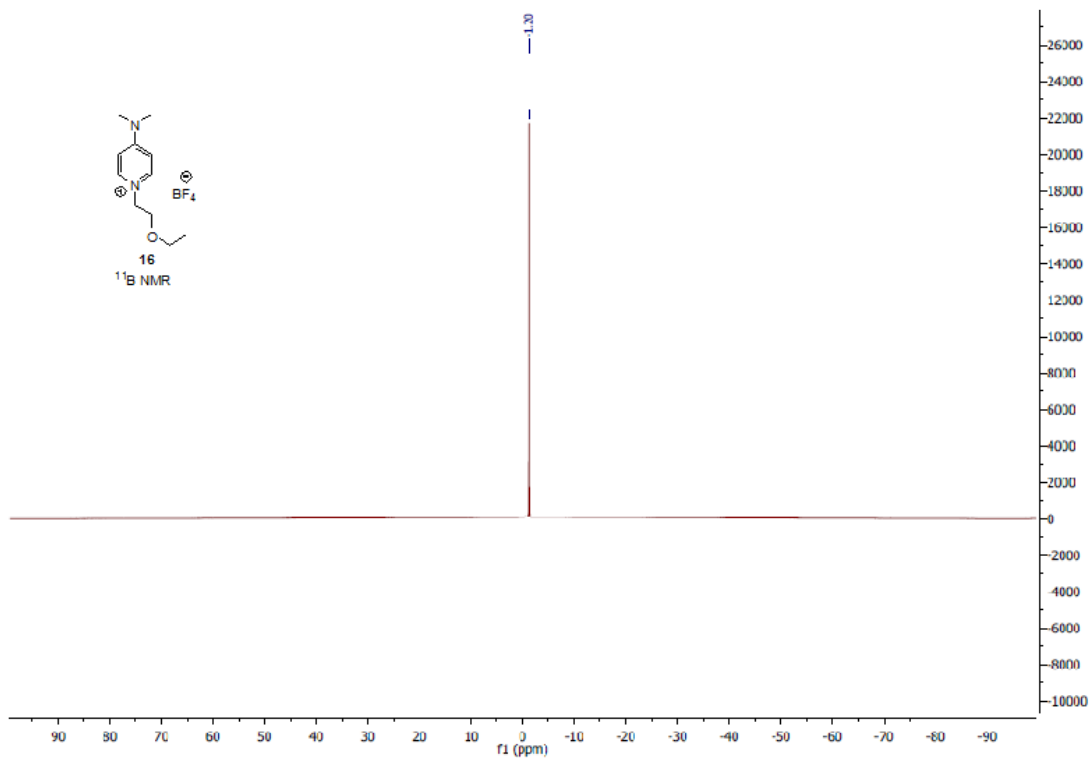



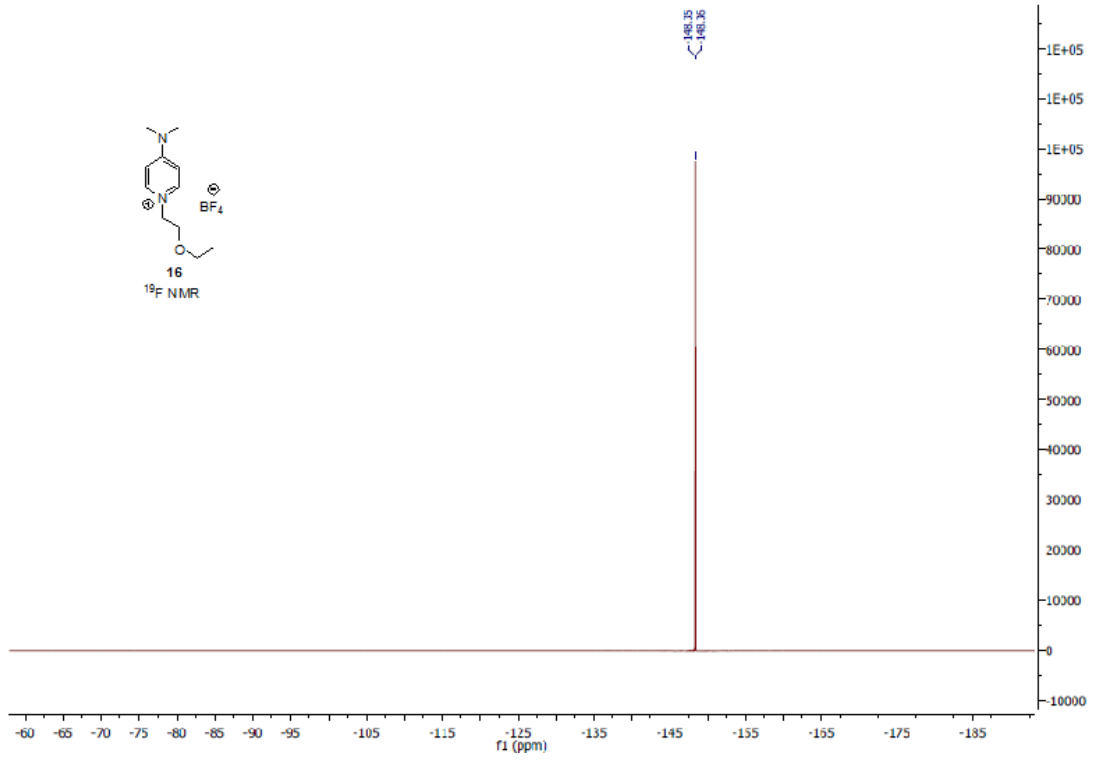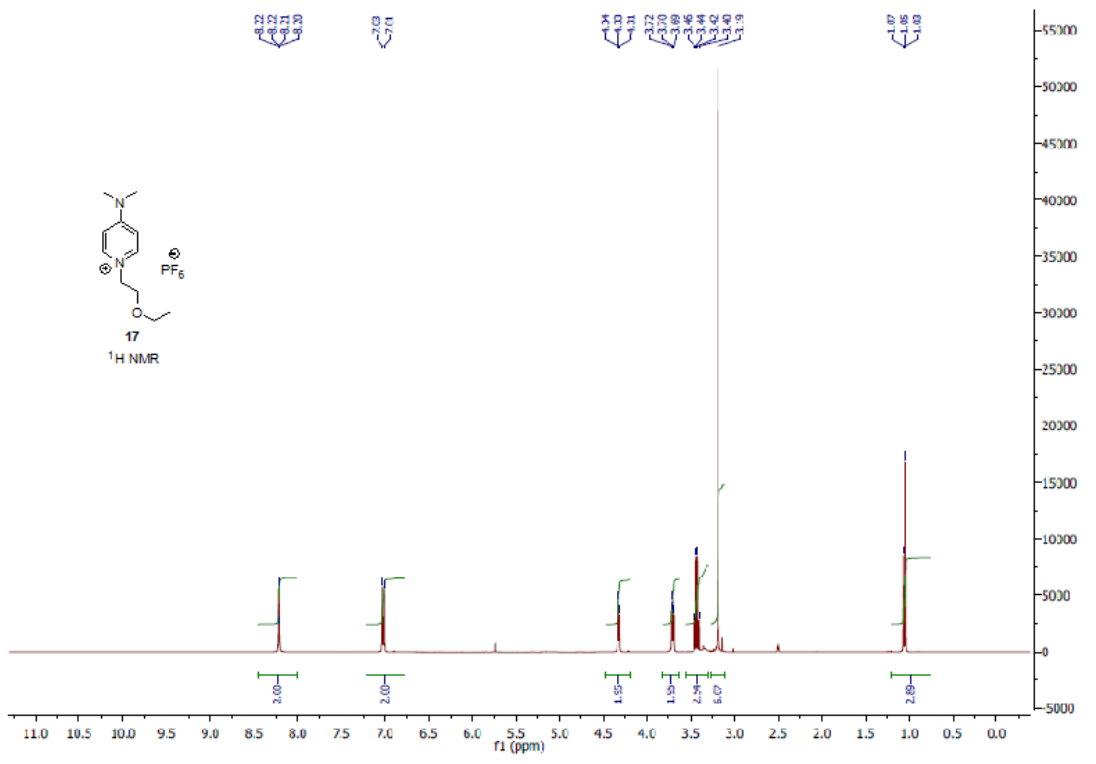

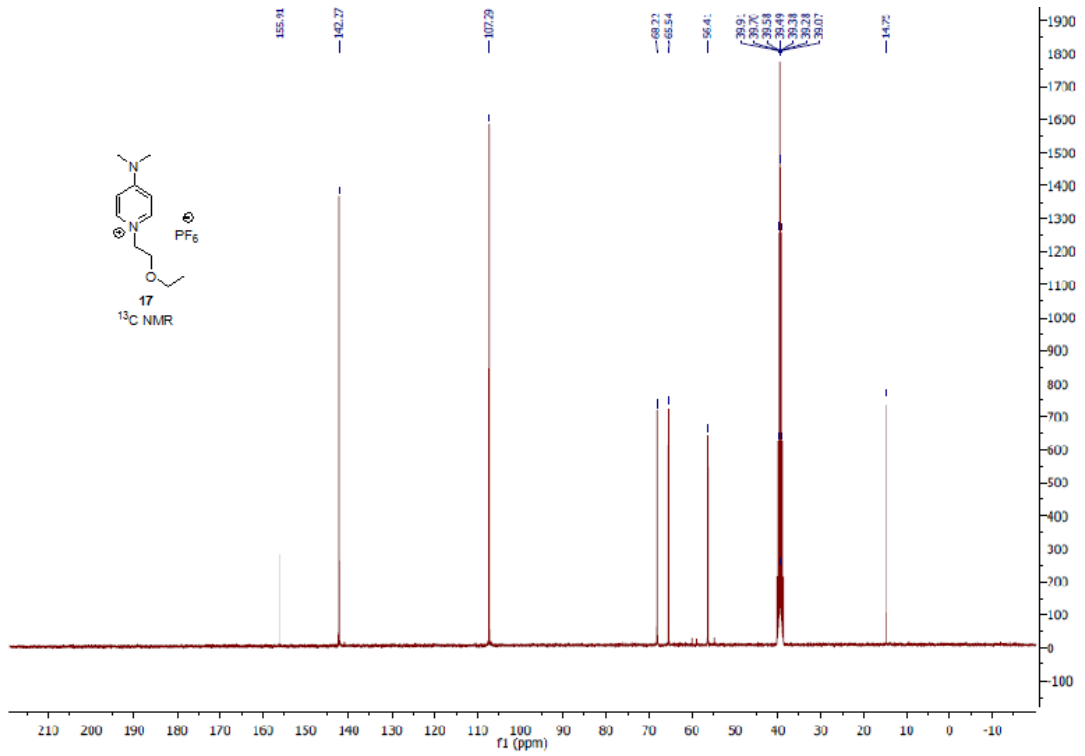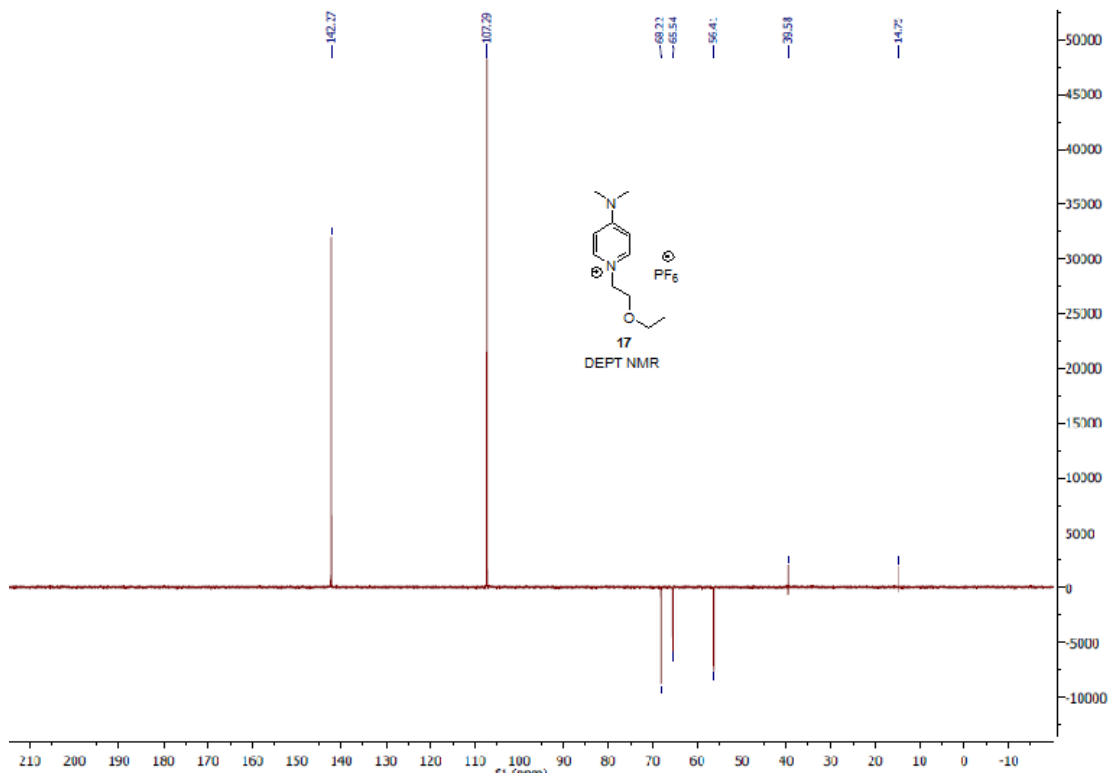

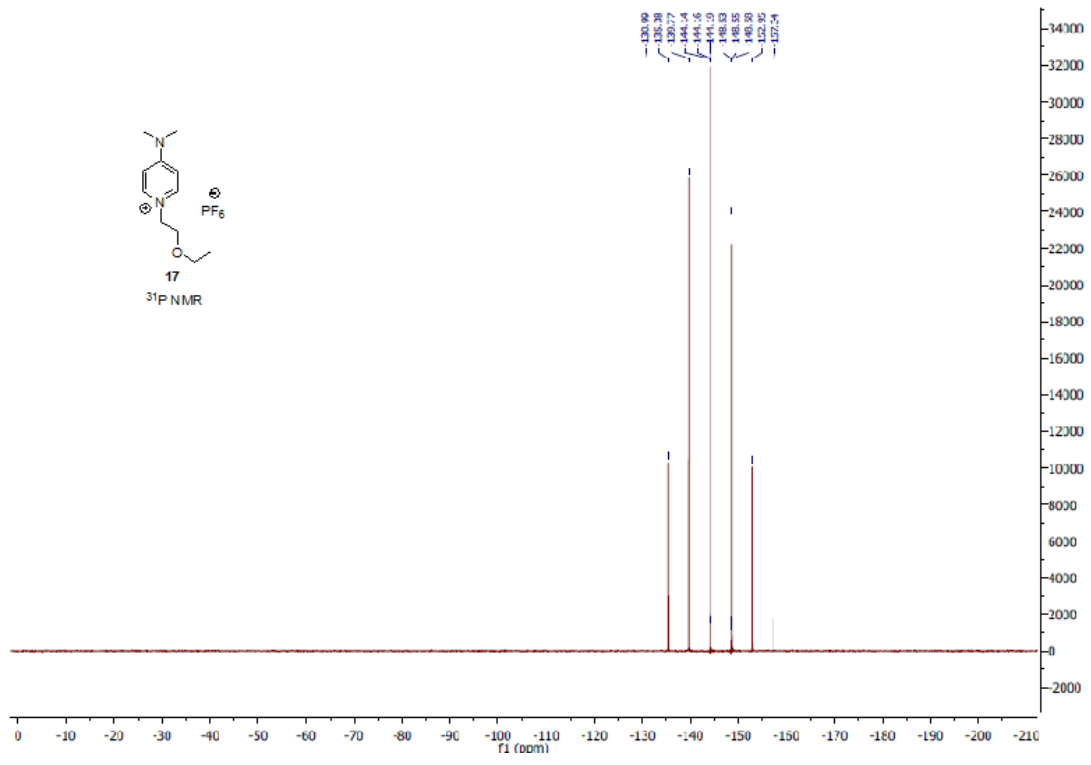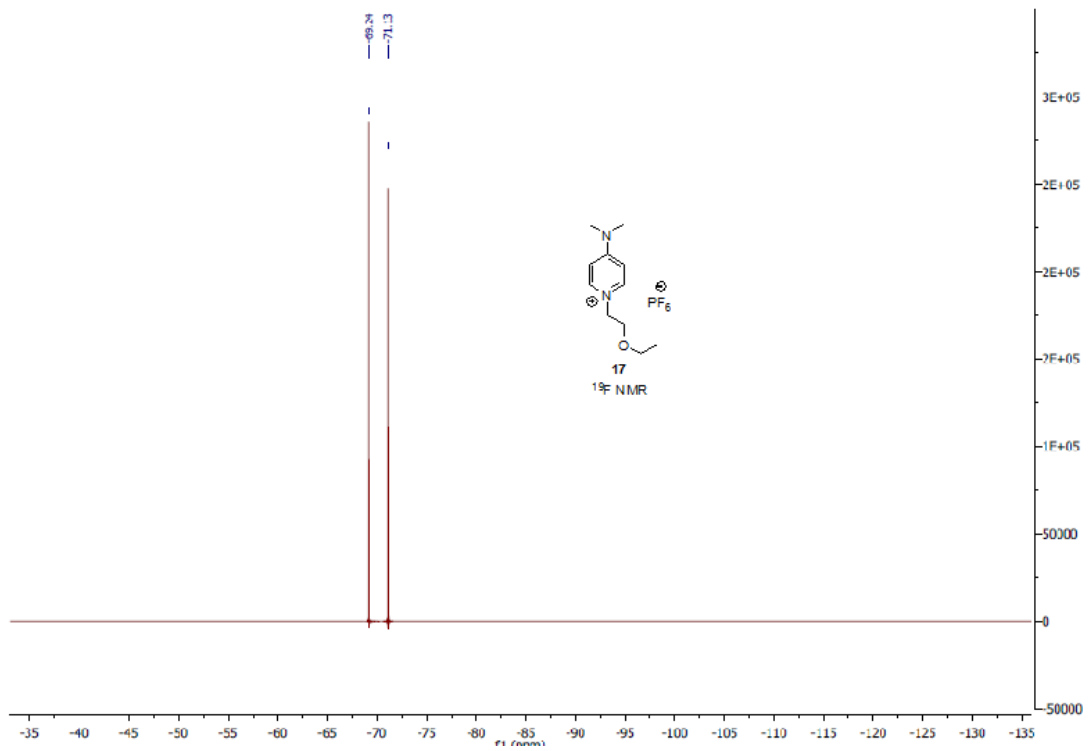

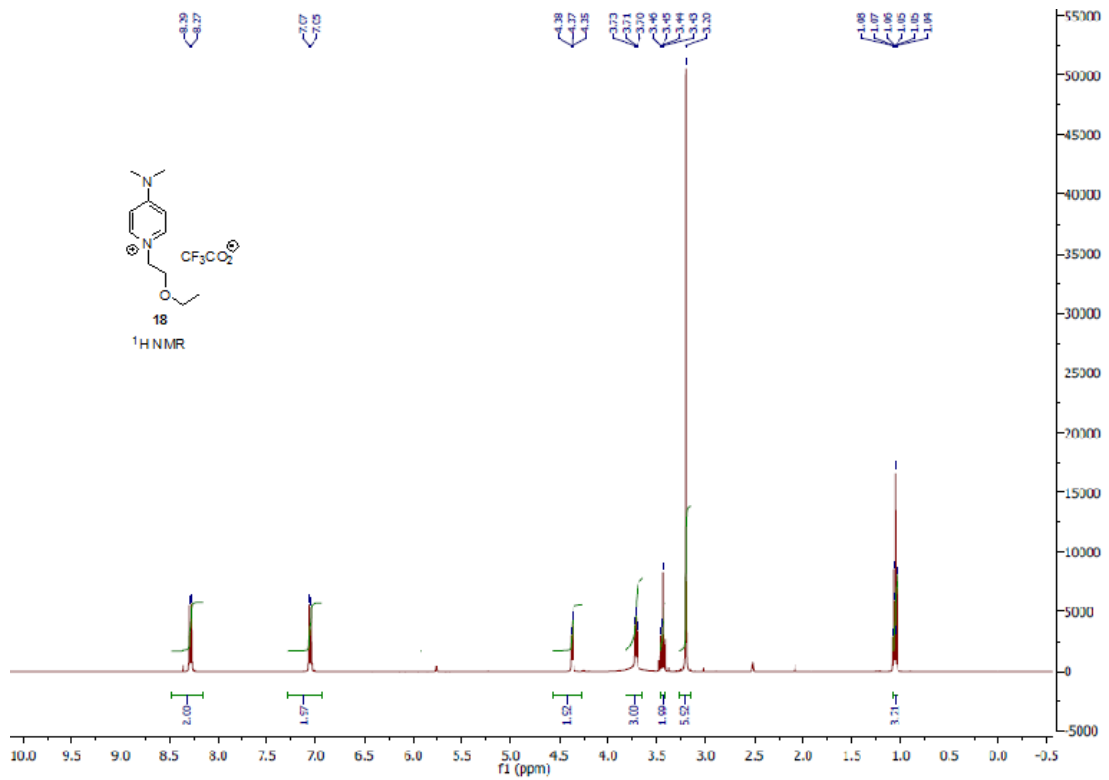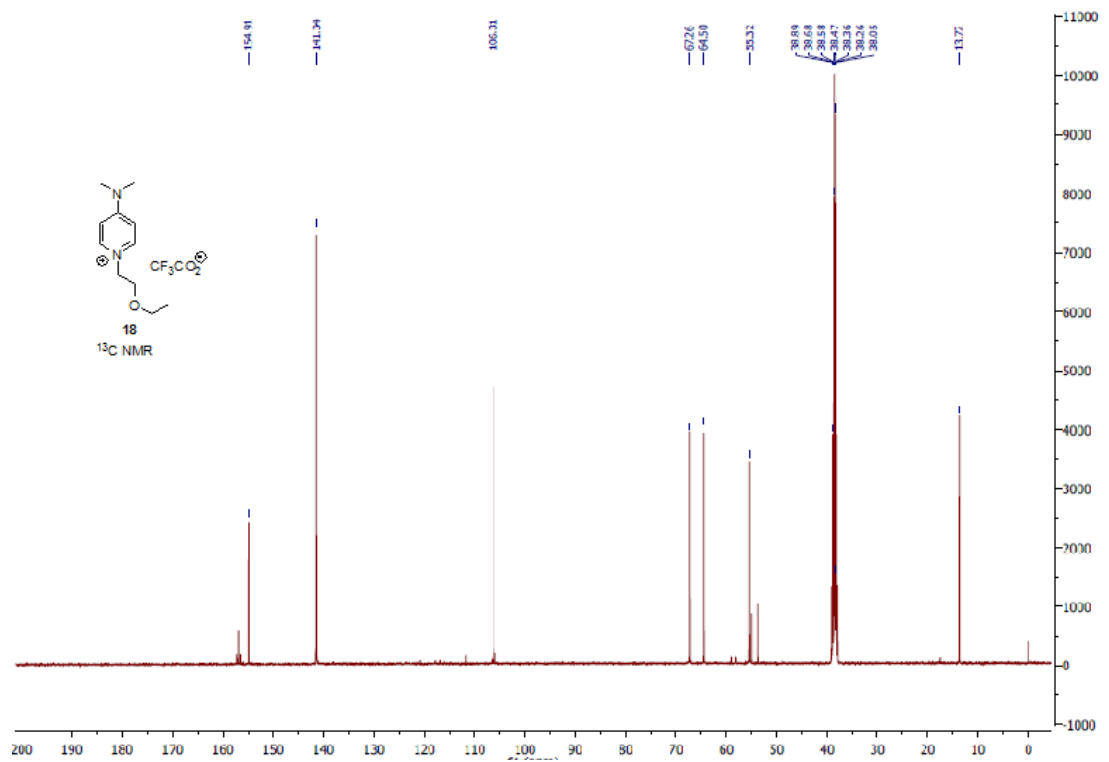

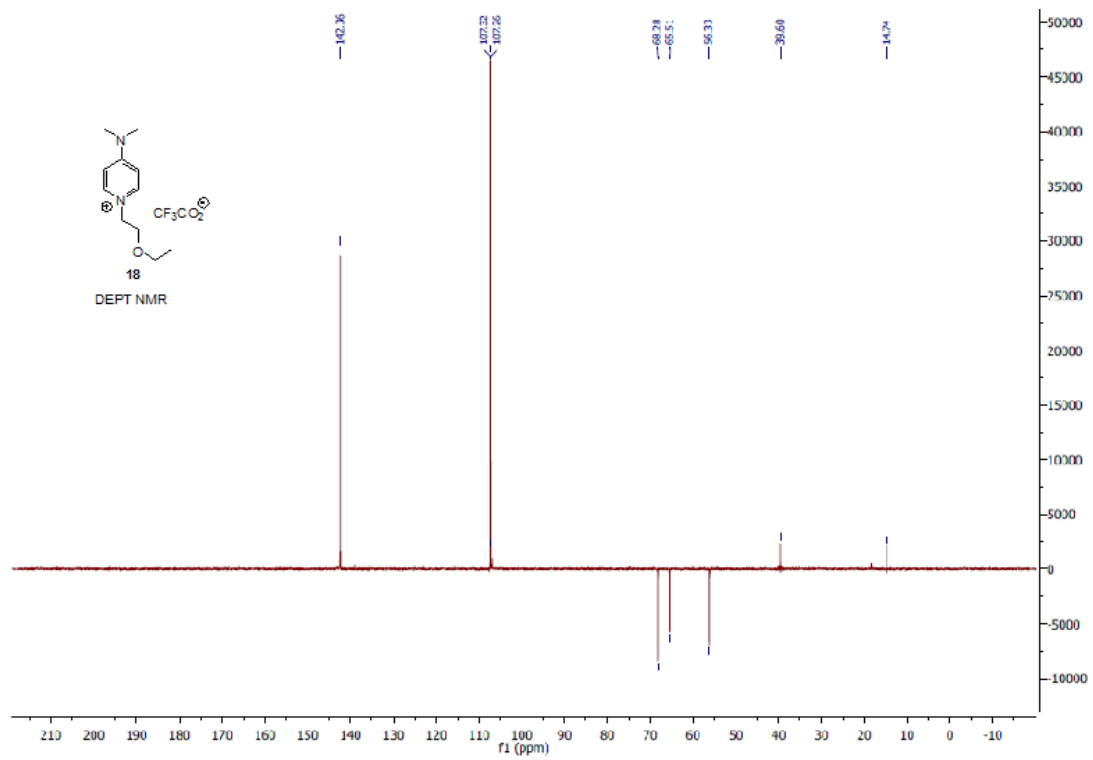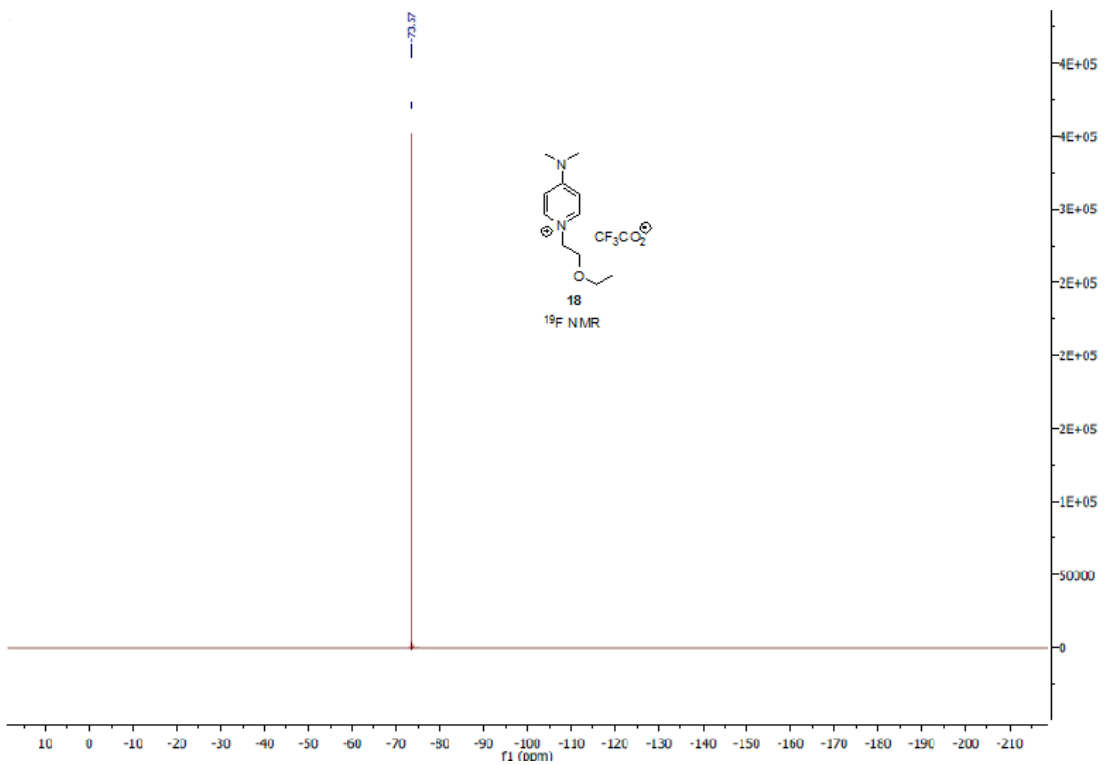

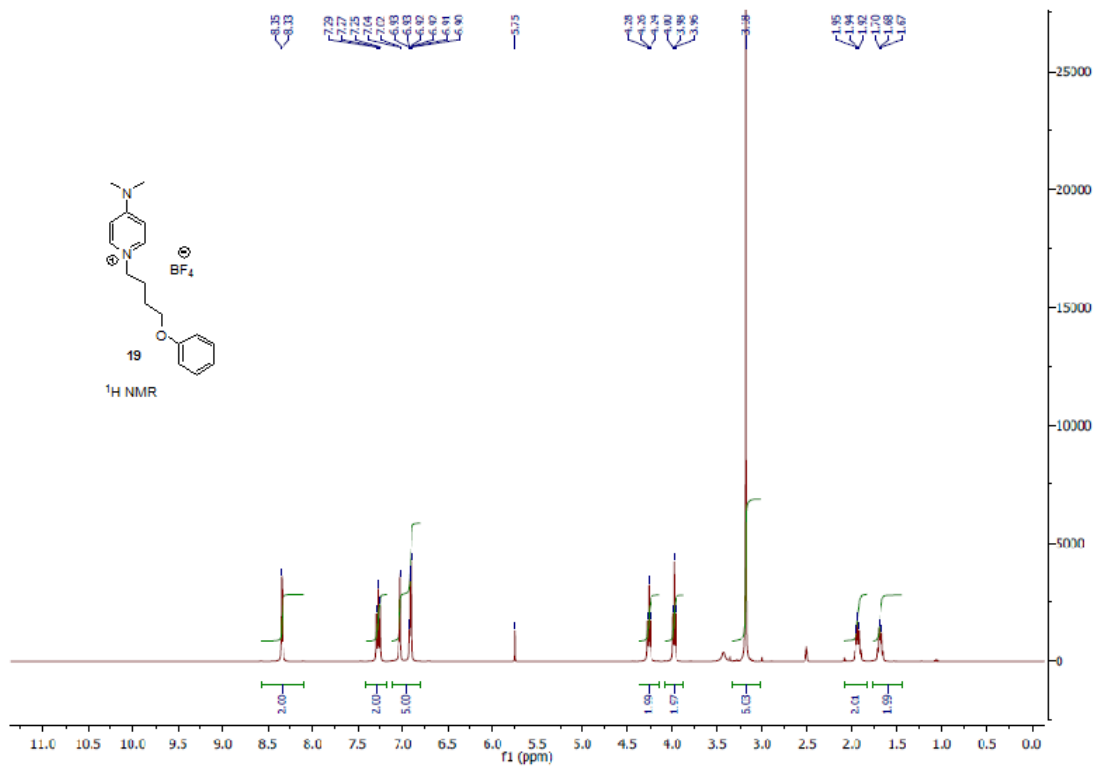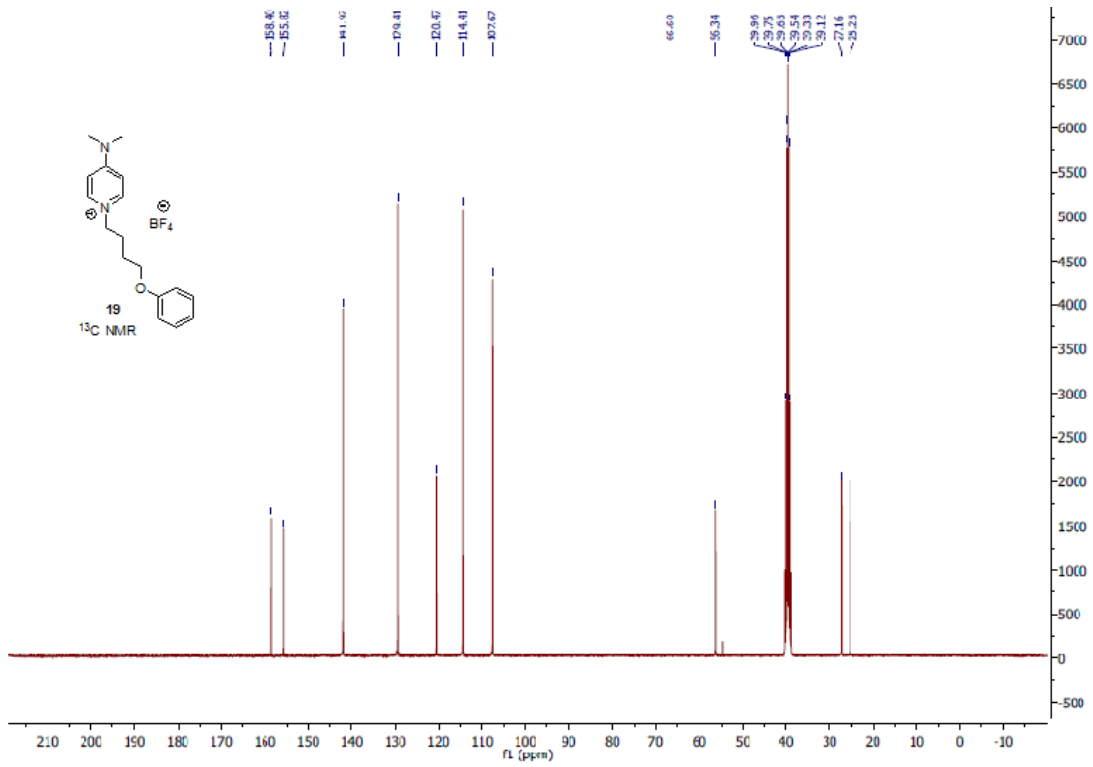

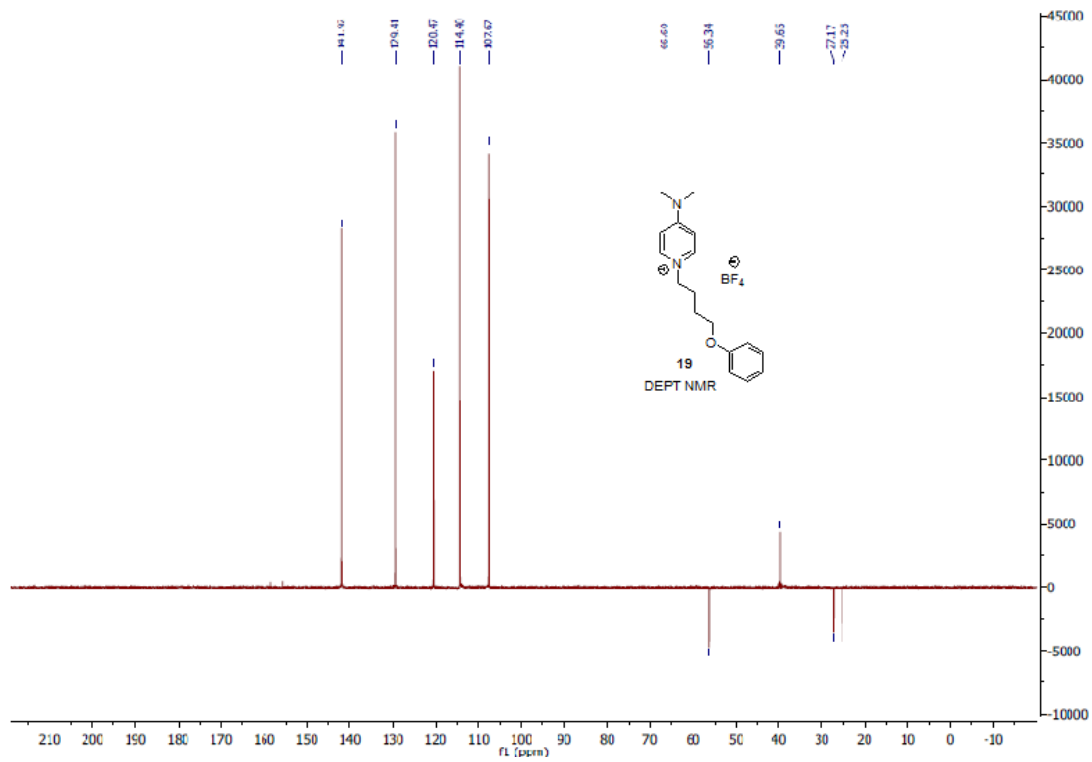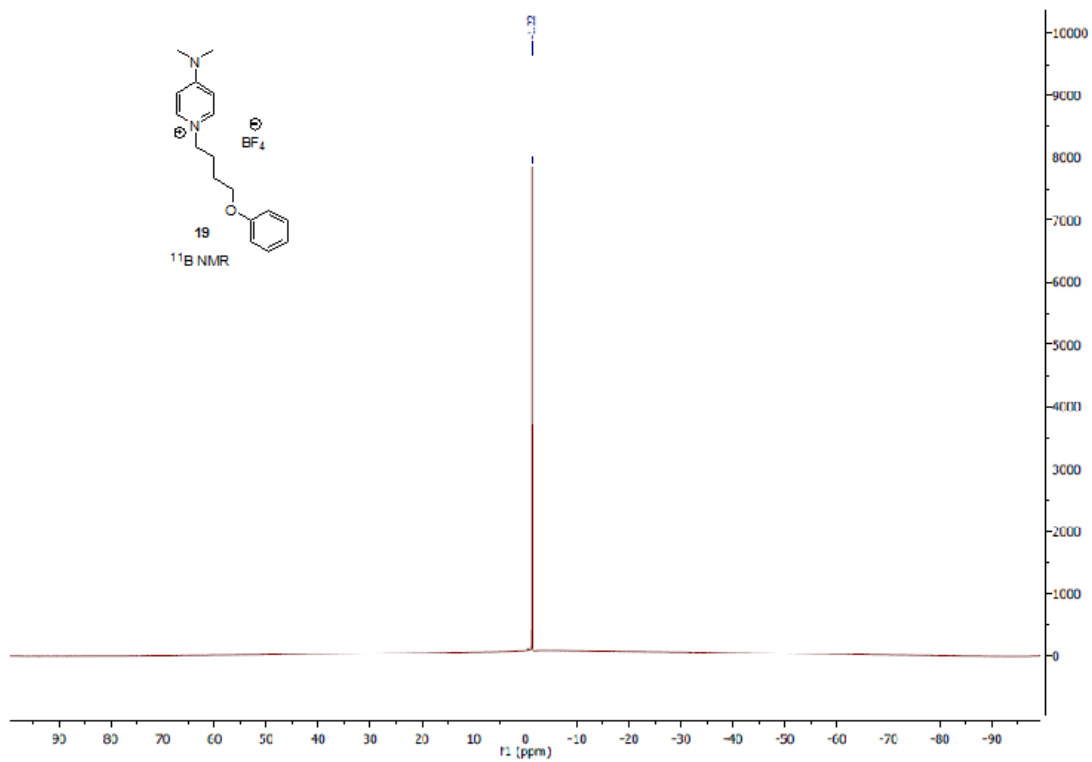

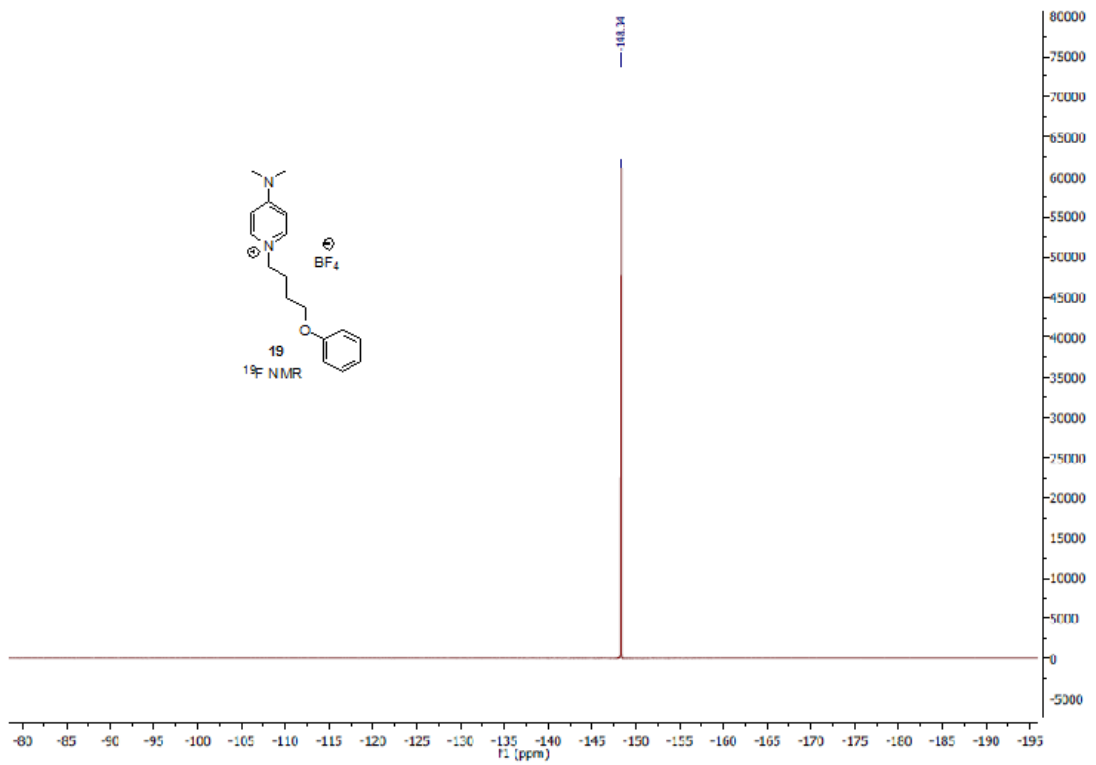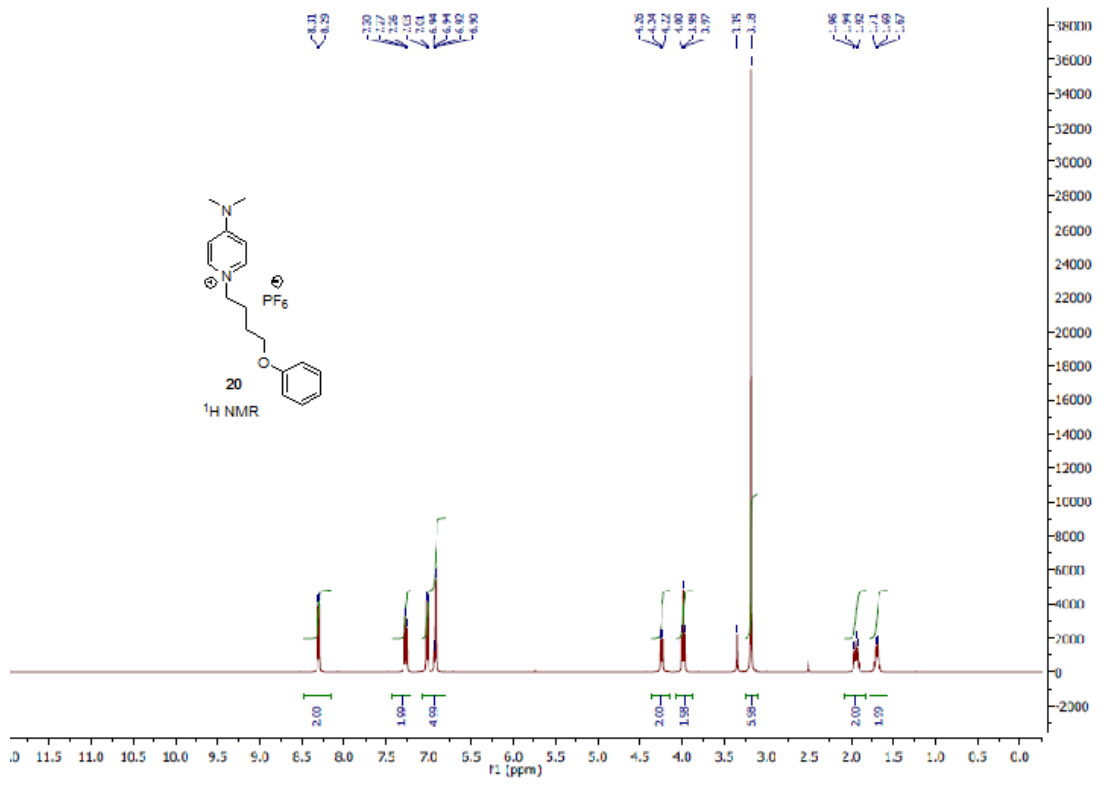



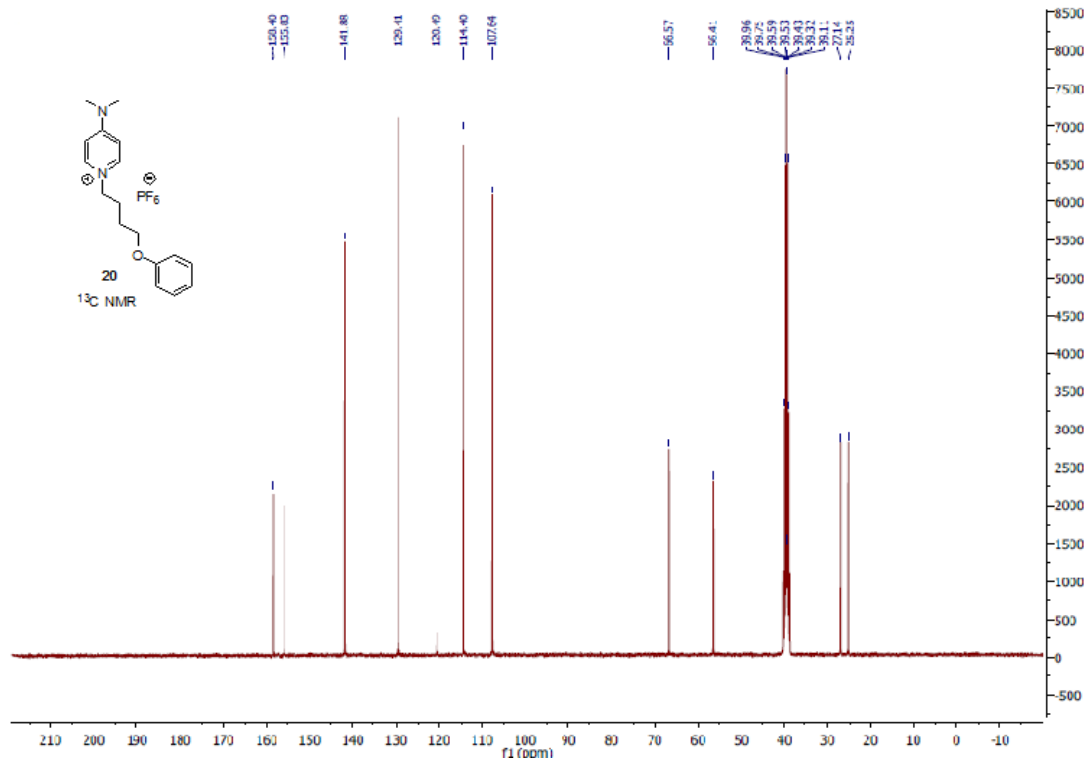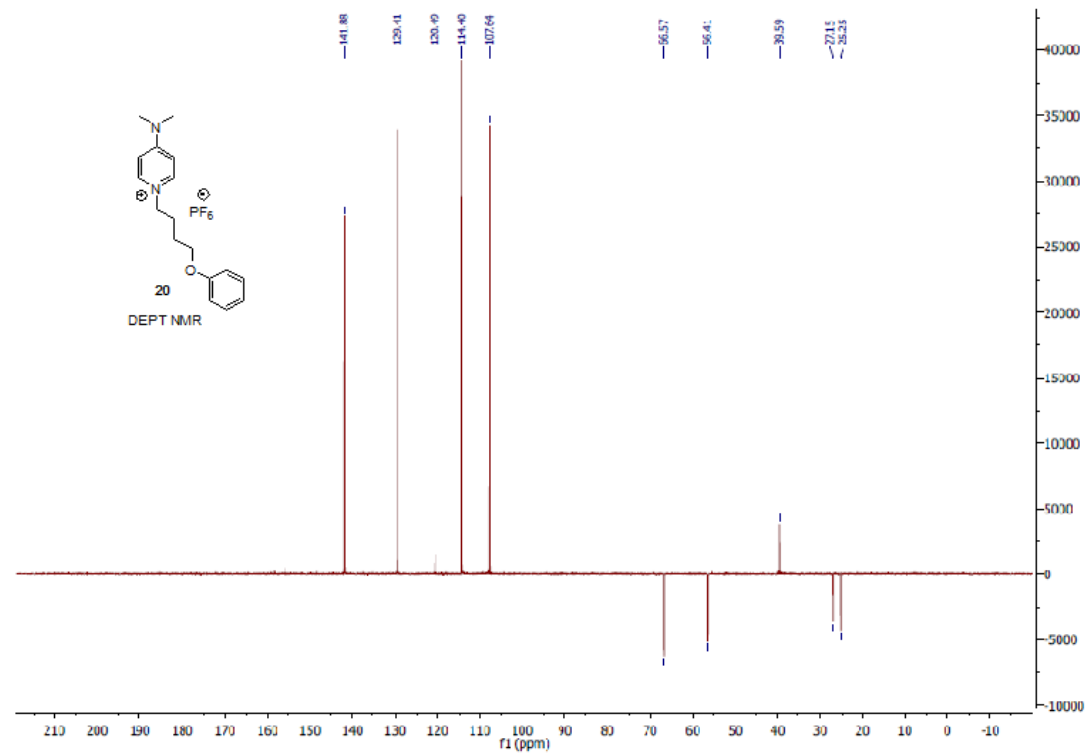

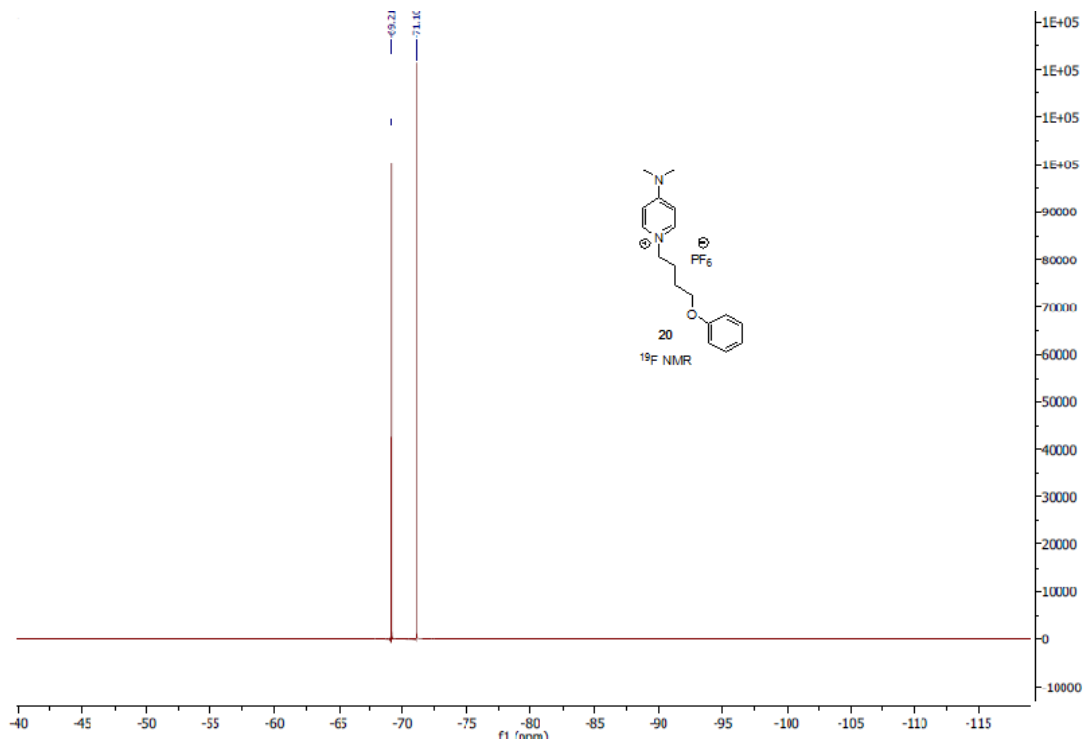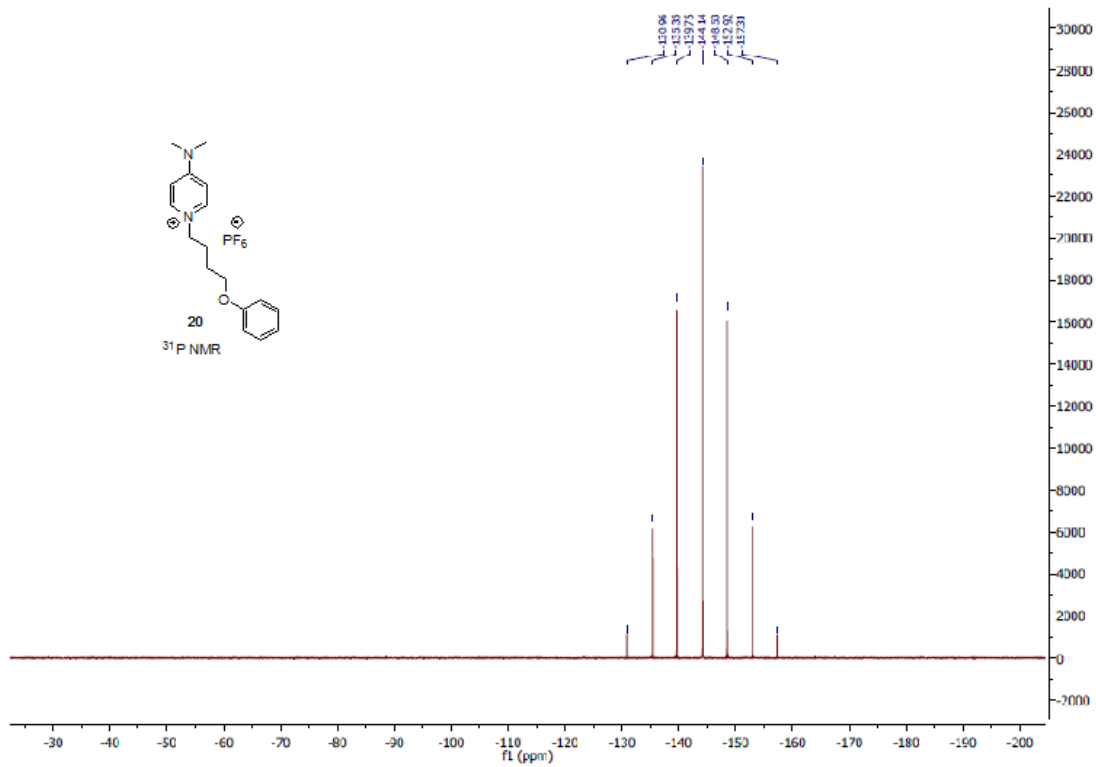

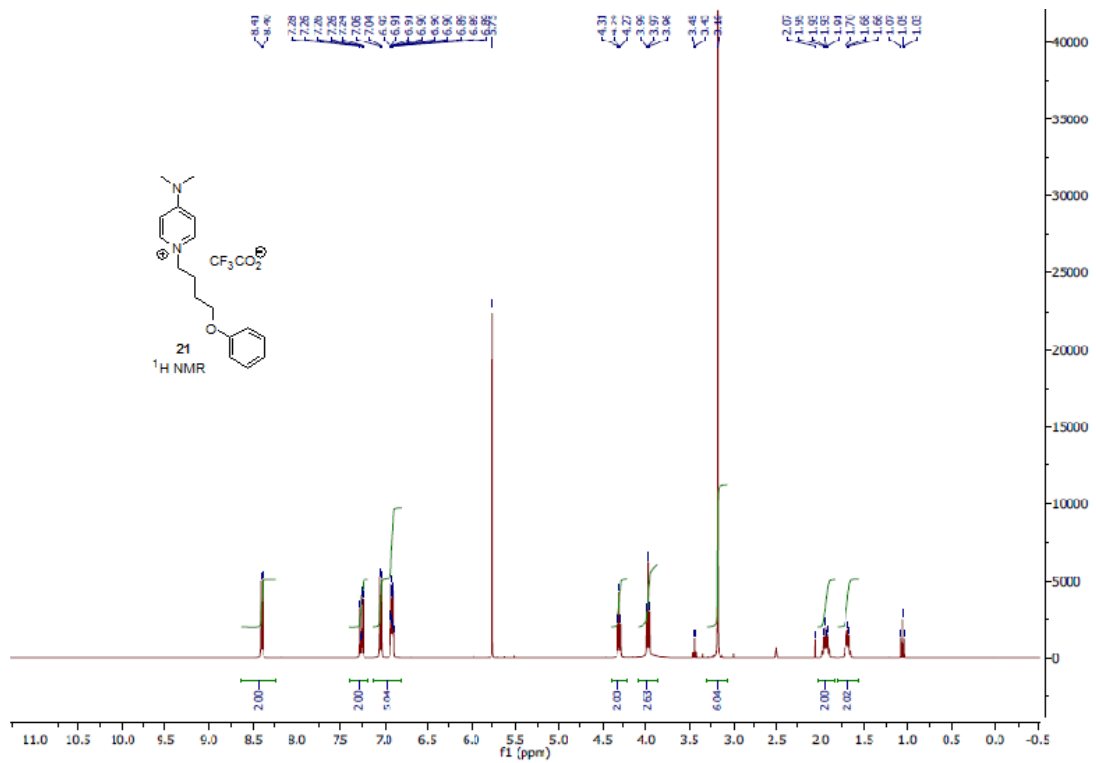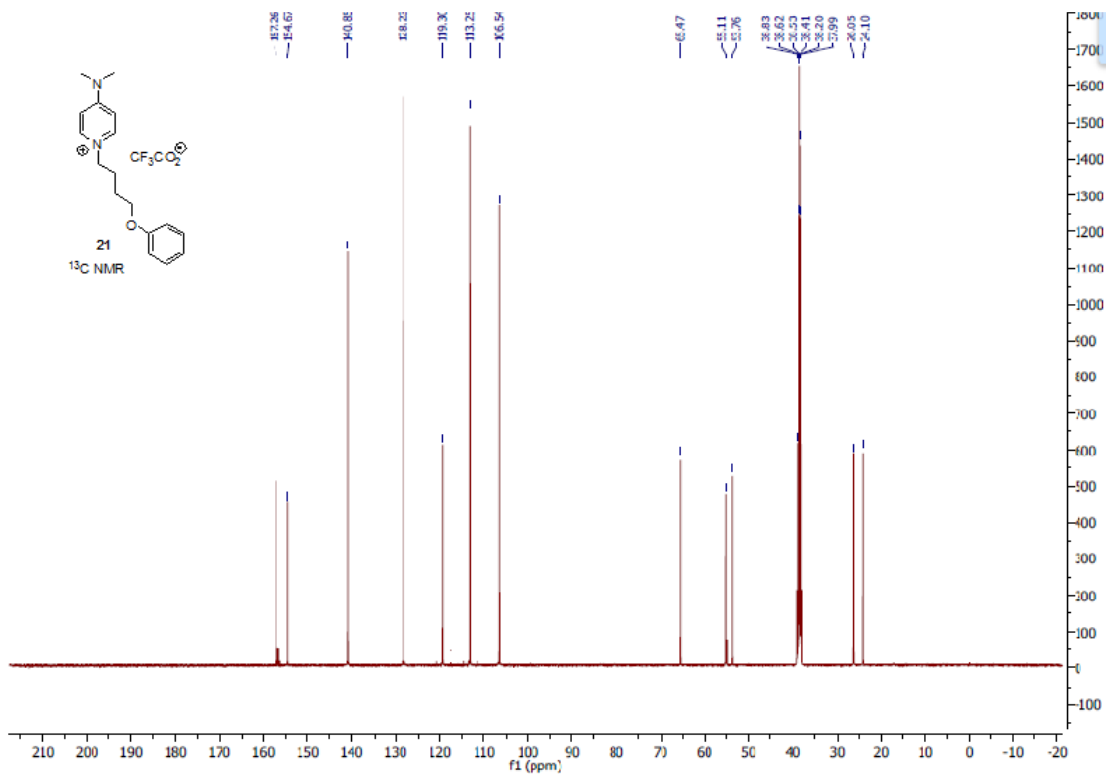

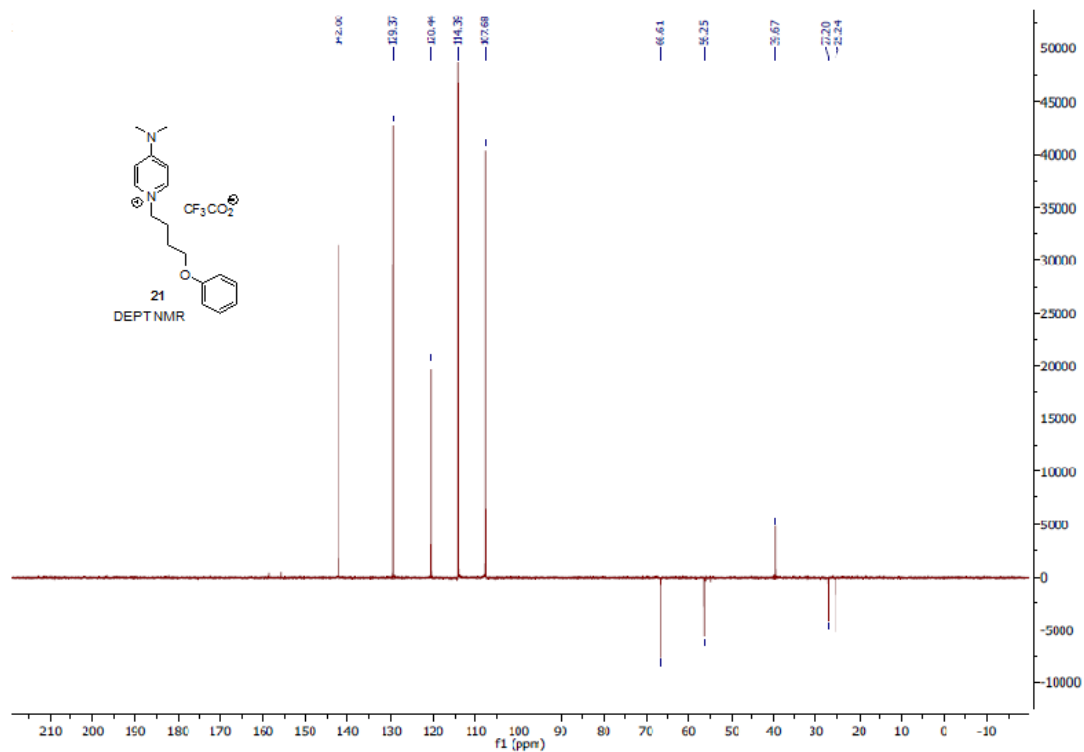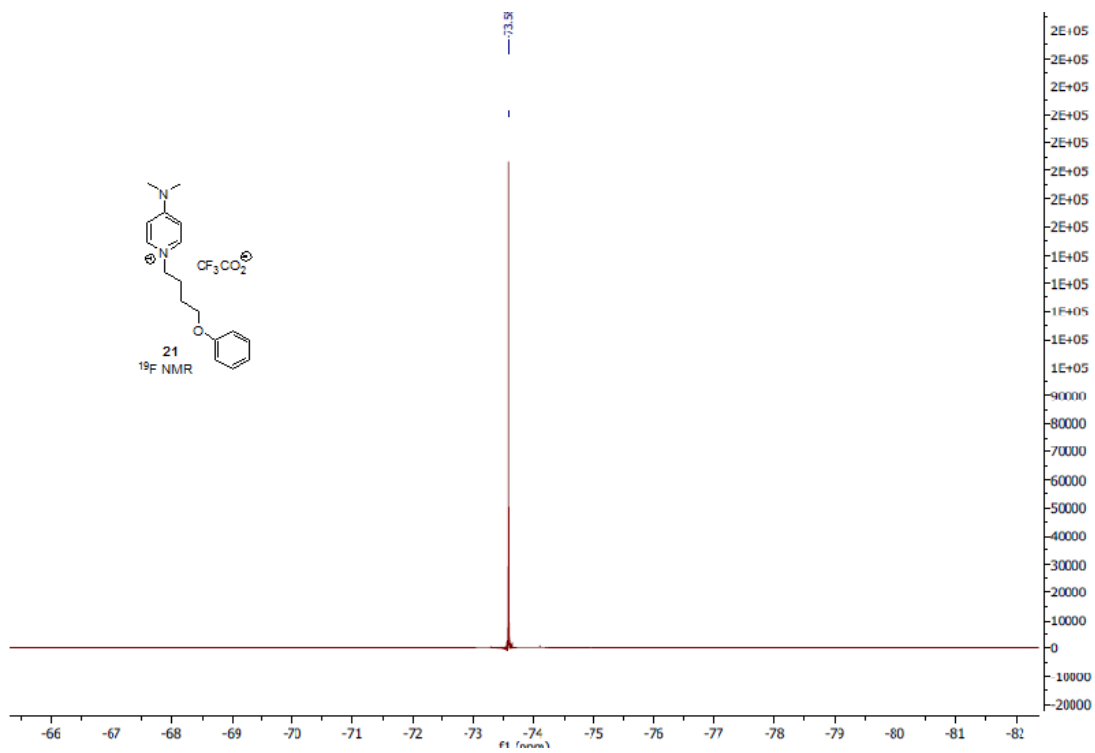

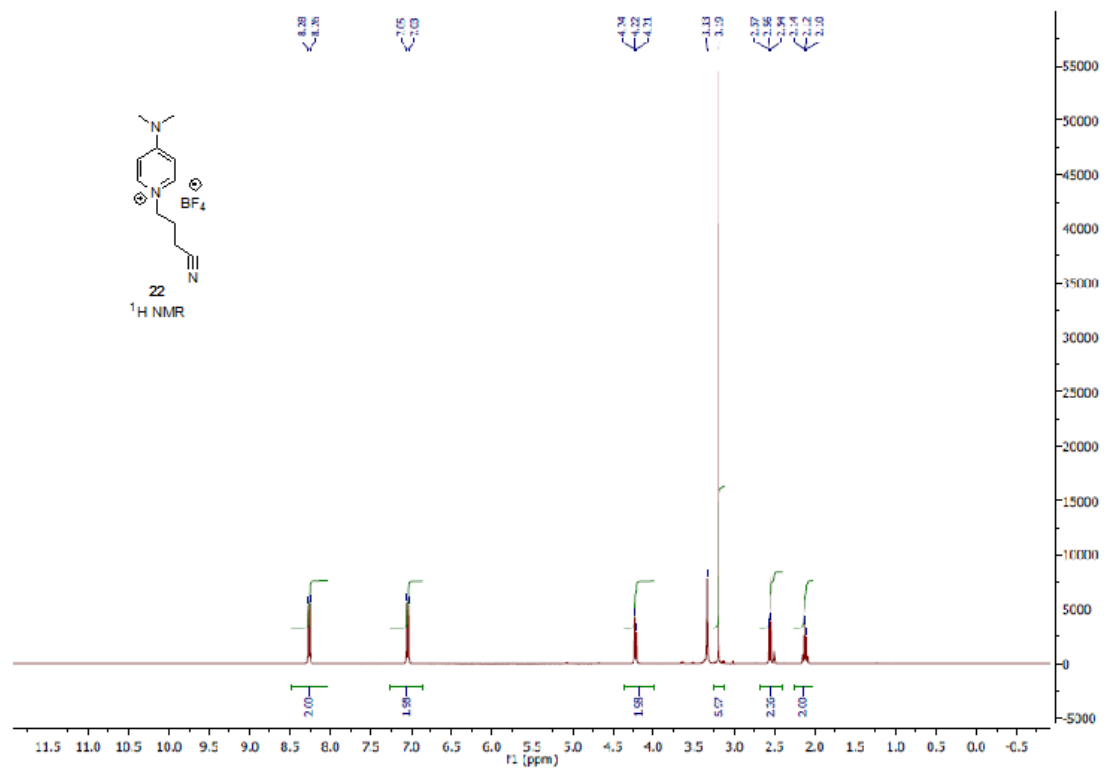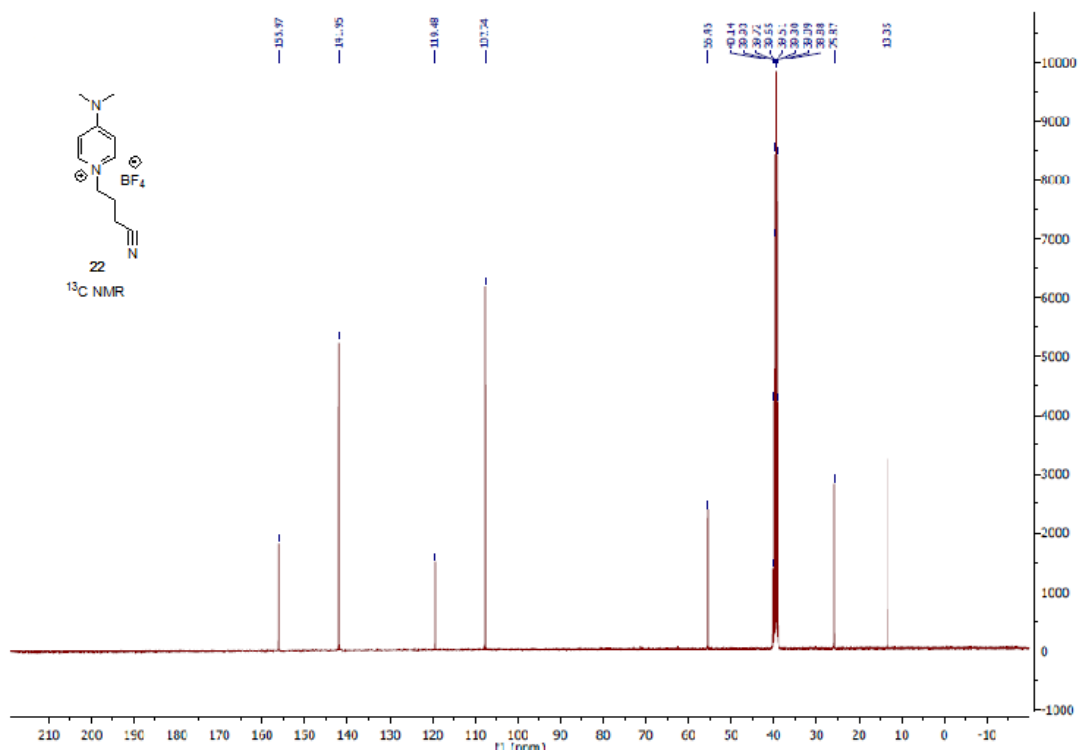

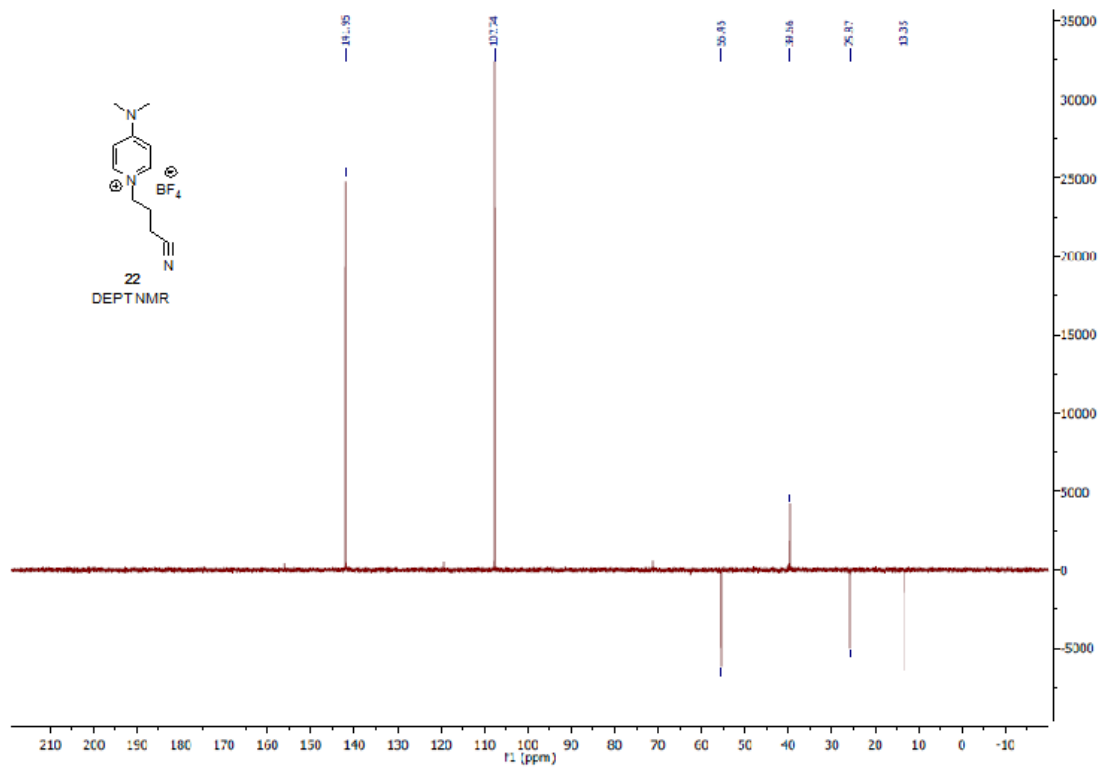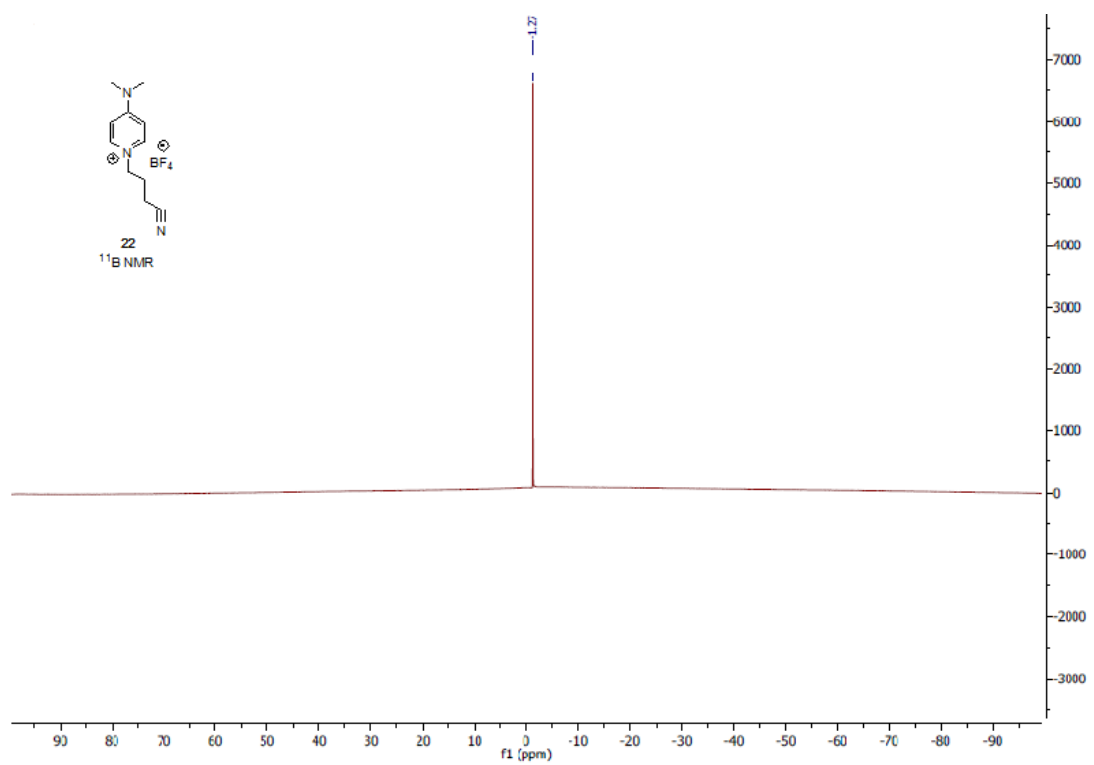

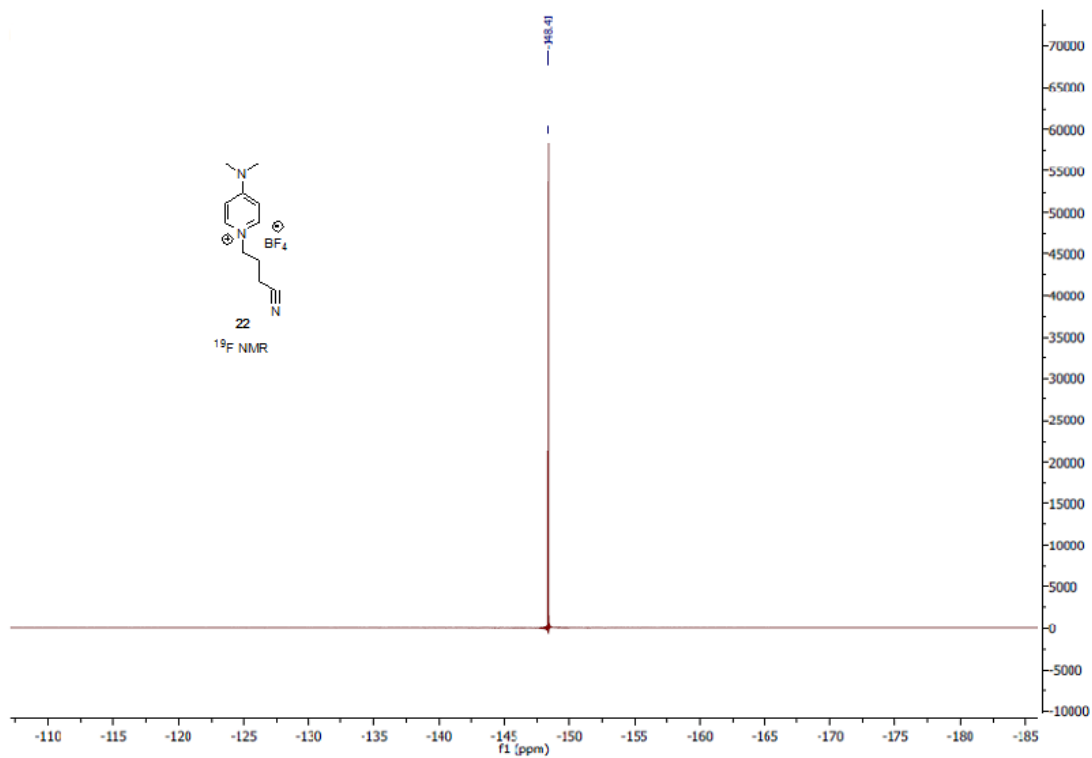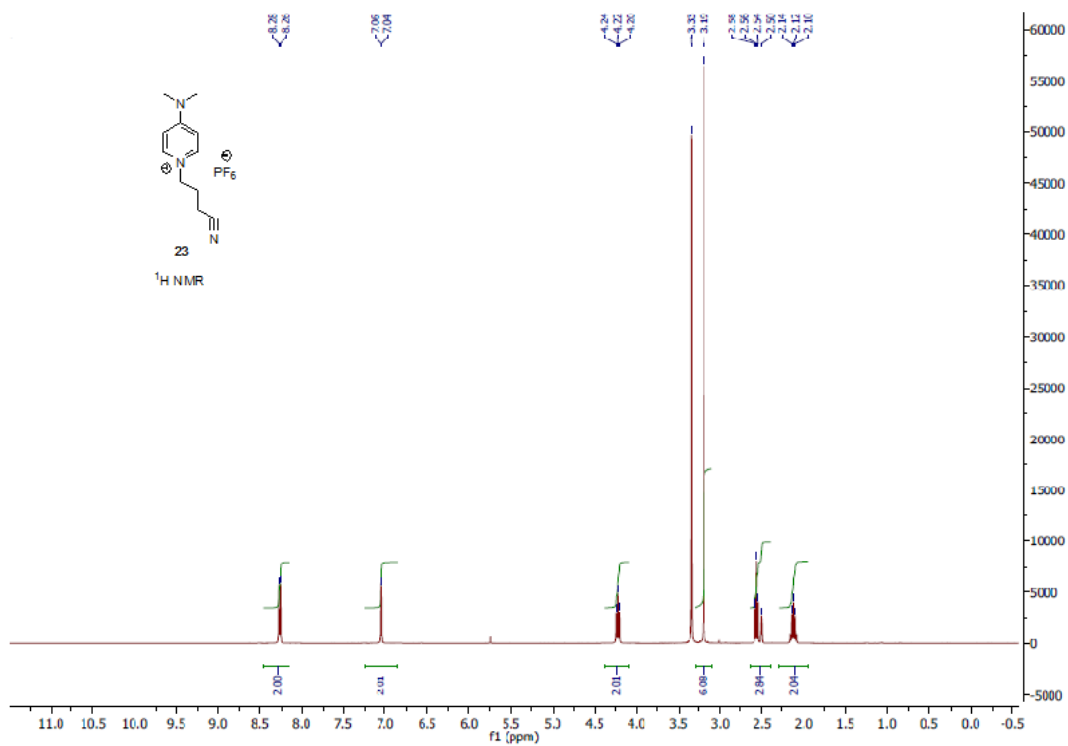

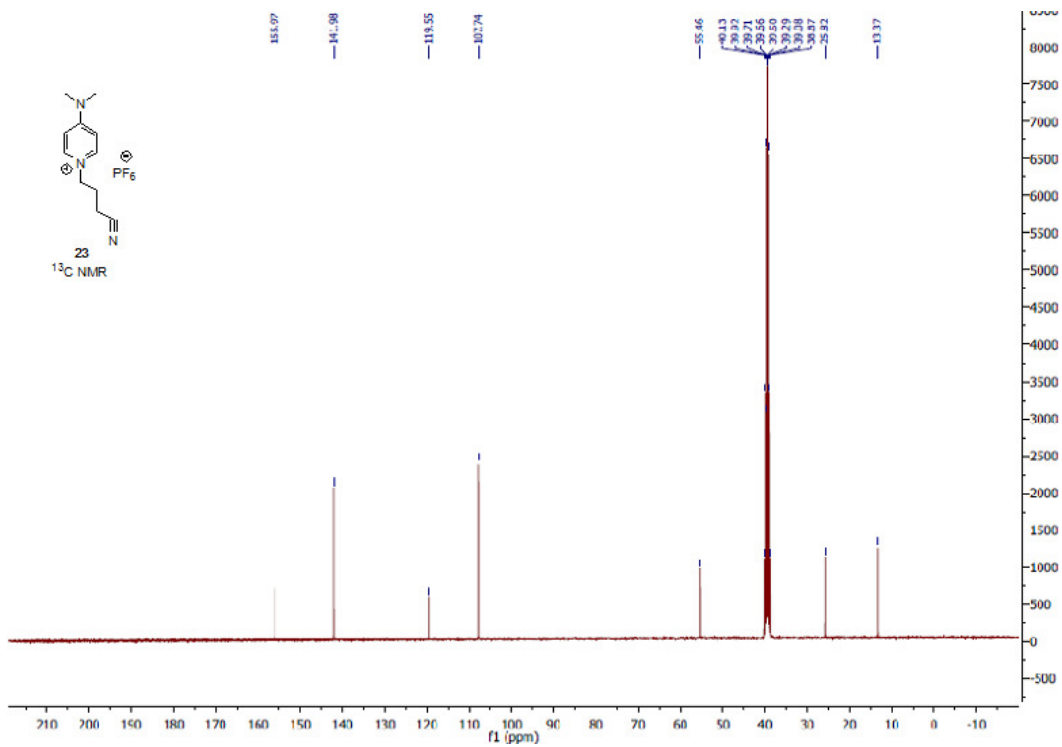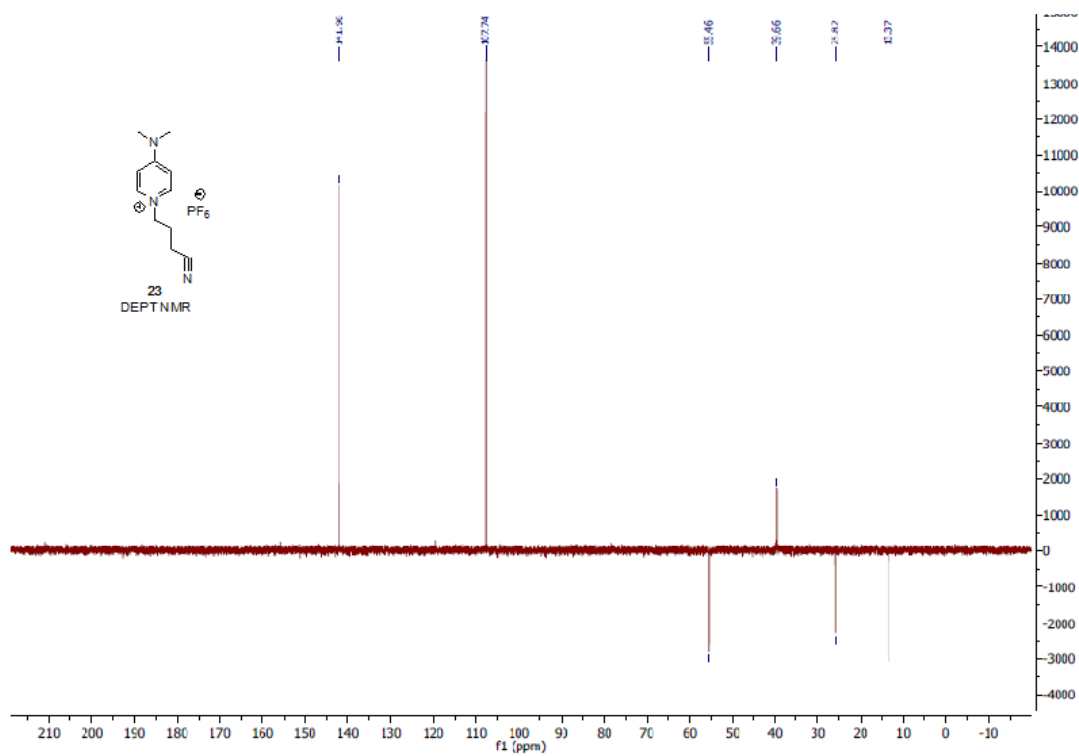



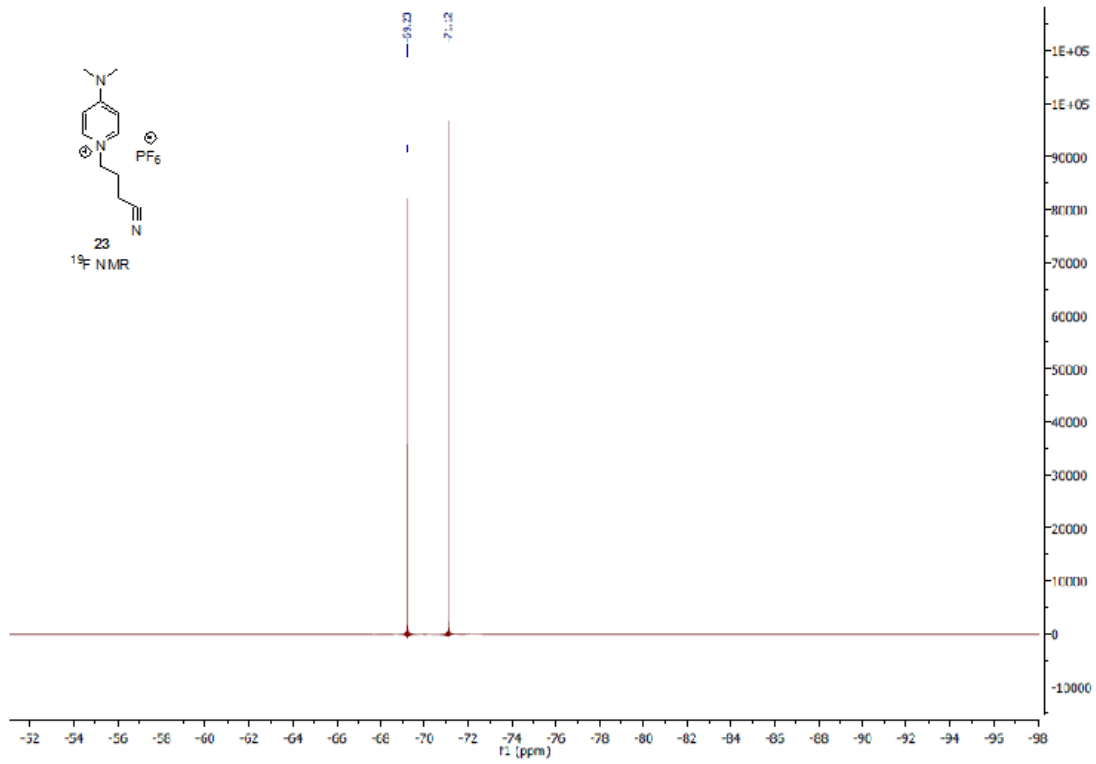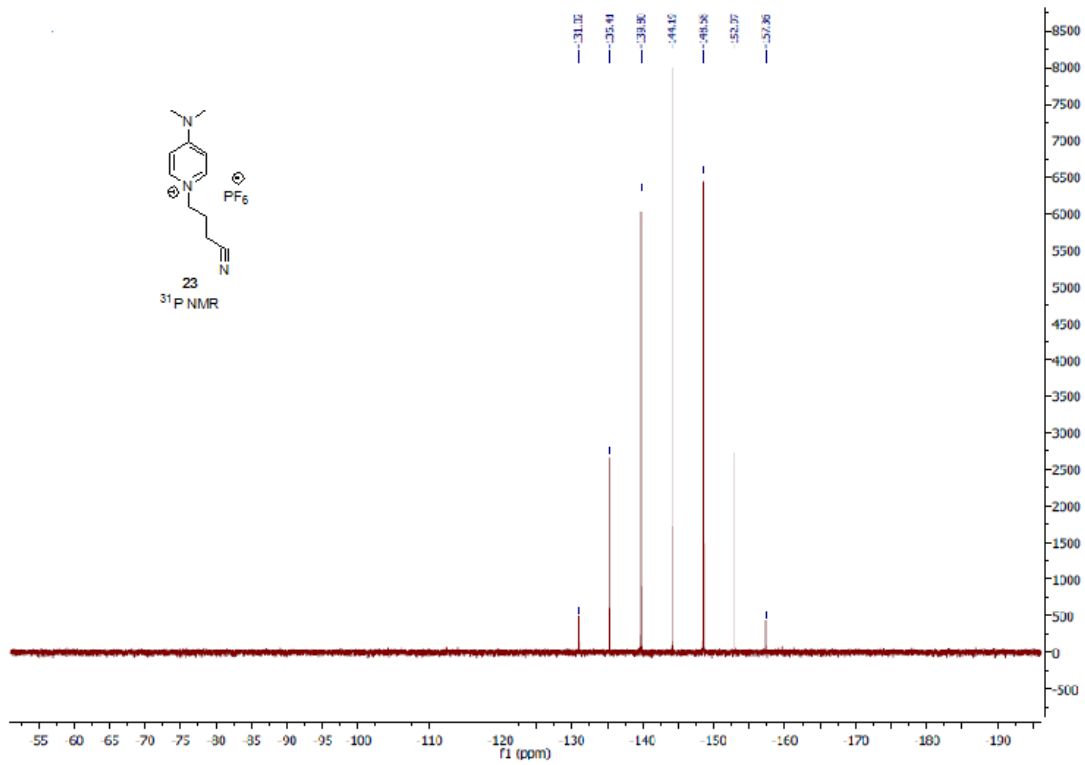

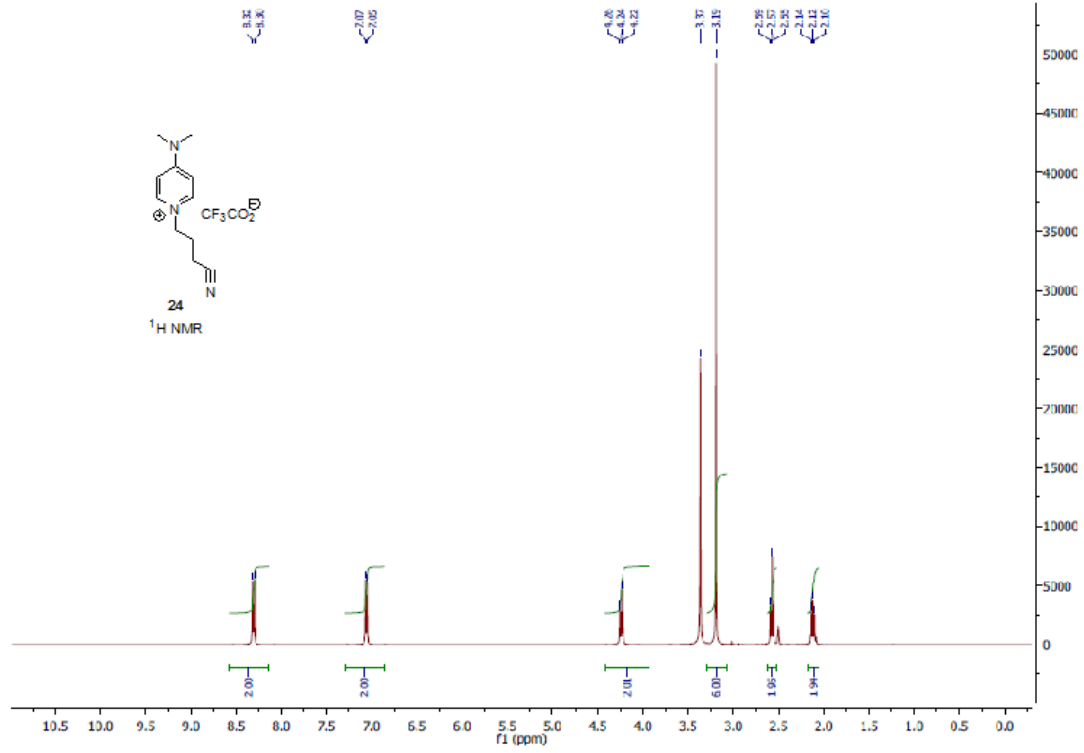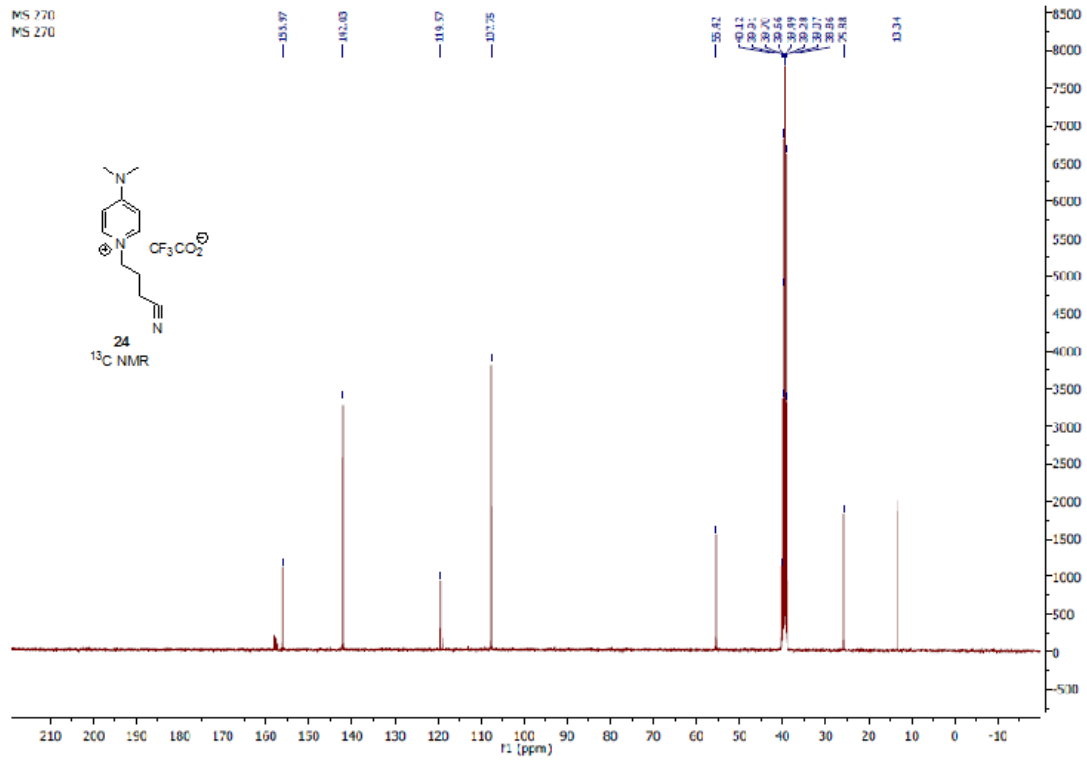

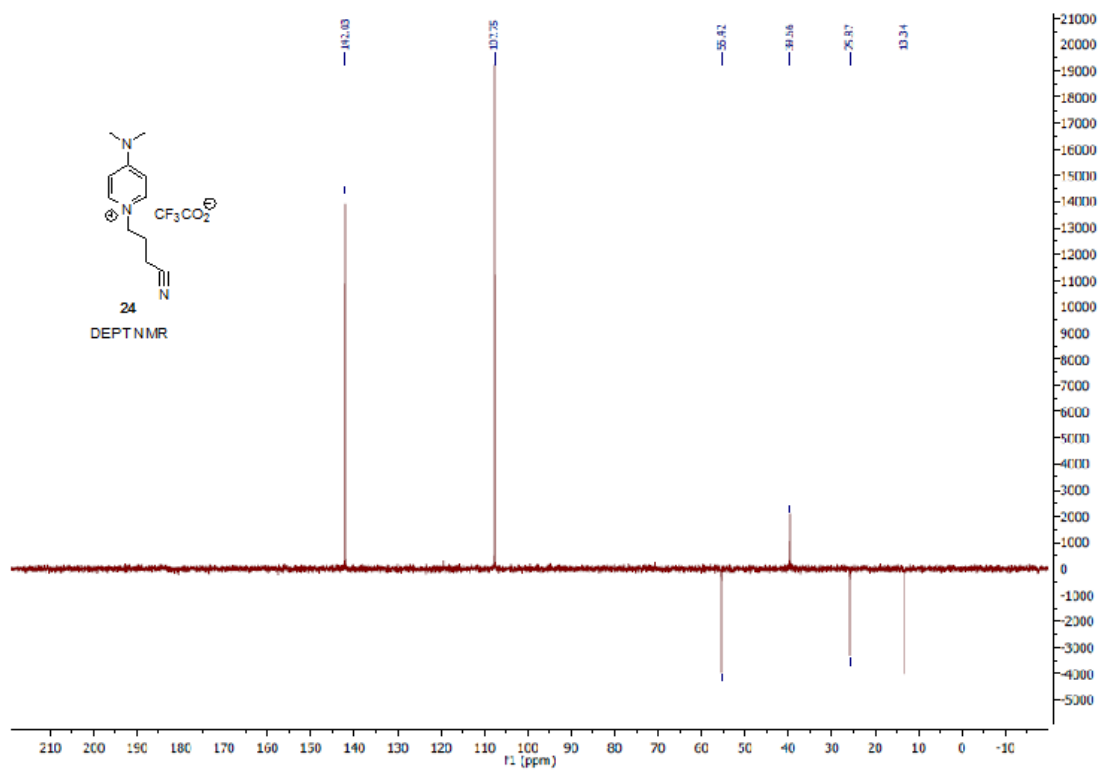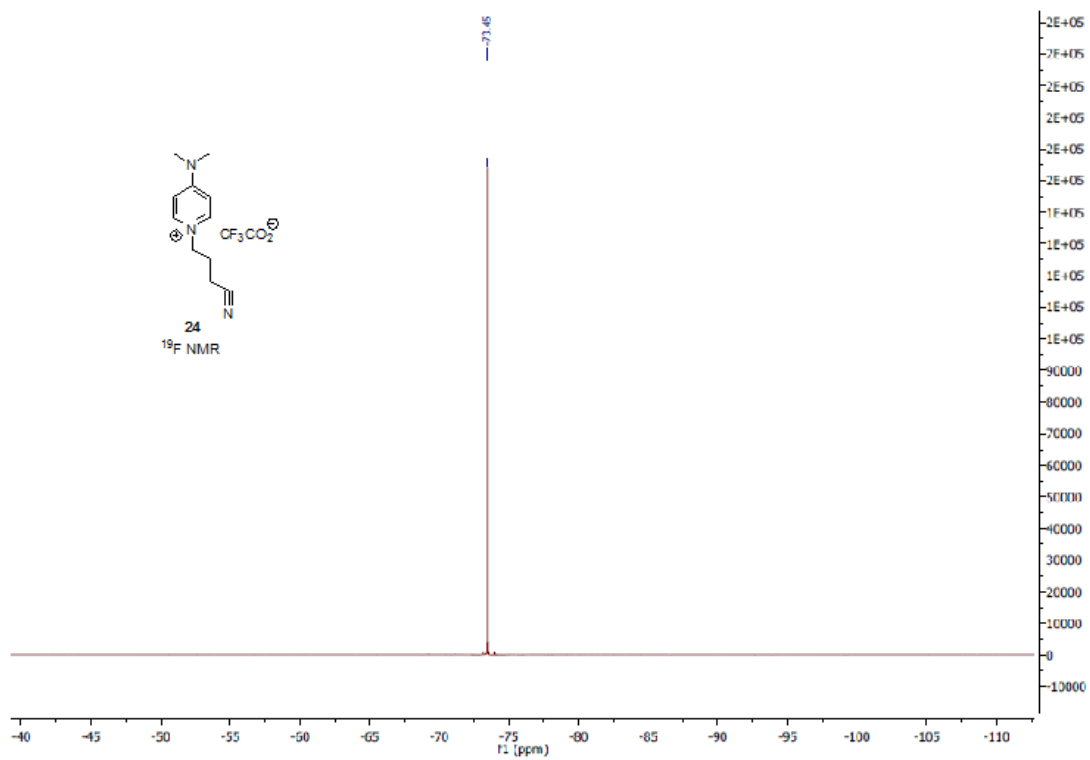

Supplement: molecules-20-14936-s001.pdf [file molecules-20-14936-s001.pdf]
